# Supplementary material for: Primary prevention of stroke: randomised controlled pilot trial protocol on engaging everyday activities promoting health
Source: PubMed Central journal article supplement — BMJ Open. 2019 Nov 2;9(11):e031984. doi: 10.1136/bmjopen-2019-031984 (PMC6830652; doi:10.1136/bmjopen-2019-031984), 2019-11-02
Supplement: bmjopen-2019-031984.draft_revisions.pdf [file bmjopen-2019-031984.draft_revisions.pdf]

# BMJ Open

BMJ Open is committed to open peer review. As part of this commitment we make the peer review history of every article we publish publicly available.

When an article is published we post the peer reviewers' comments and the authors' responses online. We also post the versions of the paper that were used during peer review. These are the versions that the peer review comments apply to.

The versions of the paper that follow are the versions that were submitted during the peer review process. They are not the versions of record or the final published versions. They should not be cited or distributed as the published version of this manuscript.

BMJ Open is an open access journal and the full, final, typeset and author-corrected version of record of the manuscript is available on our site with no access controls, subscription charges or pay-per-view fees (<http://bmjopen.bmj.com>).

If you have any questions on BMJ Open's open peer review process please email [info.bmjopen@bmj.com](mailto:info.bmjopen@bmj.com)

# BMJ Open

## Primary prevention of stroke: engaging everyday activities promoting health – a randomised controlled pilot trial protocol

|                               |                                                                                                                                                                                                                                                                                                                                                                                                                                                                                                                                                                                                                                                                                                                                |
|-------------------------------|--------------------------------------------------------------------------------------------------------------------------------------------------------------------------------------------------------------------------------------------------------------------------------------------------------------------------------------------------------------------------------------------------------------------------------------------------------------------------------------------------------------------------------------------------------------------------------------------------------------------------------------------------------------------------------------------------------------------------------|
| Journal:                      | <i>BMJ Open</i>                                                                                                                                                                                                                                                                                                                                                                                                                                                                                                                                                                                                                                                                                                                |
| Manuscript ID                 | bmjopen-2019-031984                                                                                                                                                                                                                                                                                                                                                                                                                                                                                                                                                                                                                                                                                                            |
| Article Type:                 | Protocol                                                                                                                                                                                                                                                                                                                                                                                                                                                                                                                                                                                                                                                                                                                       |
| Date Submitted by the Author: | 28-May-2019                                                                                                                                                                                                                                                                                                                                                                                                                                                                                                                                                                                                                                                                                                                    |
| Complete List of Authors:     | Patomella, Ann-Helen; Karolinska Institute, Department of Neurobiology, Care Sciences and Society<br>Guidetti, Susanne; Karolinska Institutet, Neurobiology, Care Science and Society<br>Mälstam, Emelie; Karolinska Institute, Department of Neurobiology, Care Sciences and Society<br>Eriksson, Christina; Karolinska Institute, Department of Neurobiology, Care Sciences and Society<br>Bergström, Aileen; Karolinska Institutet Department of Neurobiology Care Sciences and Society<br>Åkesson, Elisabet; Karolinska Institute, Department of Neurobiology, Care Sciences and Society<br>Kottorp, Anders; Malmö Universitet<br>Asaba, Eric; Karolinska Institute, Department of Neurobiology, Care Sciences and Society |
| Keywords:                     | Stroke < NEUROLOGY, Prevention, Mhealth, PRIMARY CARE, stroke risk, occupational therapy                                                                                                                                                                                                                                                                                                                                                                                                                                                                                                                                                                                                                                       |
|                               |                                                                                                                                                                                                                                                                                                                                                                                                                                                                                                                                                                                                                                                                                                                                |

SCHOLARONE™  
Manuscripts

1  
2  
3  
4 **Primary prevention of stroke: engaging everyday activities promoting health – a**  
5 **randomised controlled pilot trial protocol**  
6  
7  
8

9 Patomella AH (ORCID 0000-0003-2667-4073)<sup>1</sup>, Guidetti S ( ORCID 0000-0001-6878-6394) <sup>1</sup>,  
10 Mälstam E (ORCID 0000-0002-0840-6342)<sup>1, 2</sup>, Eriksson C (ORCID 0000-0002-0546-1151)<sup>1, 3</sup>,  
11 Bergström A (ORCID 0000-0002-7091-7514)<sup>1</sup> , Åkesson E (ORCID 0000-0002-8227-  
12 9118)<sup>5,6</sup>, Kottorp A (ORCID 0000-0002-8976-2612)<sup>4</sup>, and Asaba E (ORCID 0000-0002-6910-  
13 3468)<sup>1</sup> .  
14  
15  
16

17  
18 <sup>1</sup>Department of Neurobiology, Care Sciences and Society, Division of Occupational Therapy,  
19 Karolinska Institutet, Stockholm, Sweden  
20

21 <sup>2</sup>Faculty of Health and Occupational studies, Department of Public health and Sport  
22 sciences, University of Gävle, Sweden  
23

24 <sup>3</sup> Academic Primary Healthcare Centre, Stockholm  
25

26 <sup>4</sup>University of Malmö  
27

28 <sup>5</sup>Department of Neurobiology, Care Sciences and Society, Division of Neurogeriatrics,  
29 Karolinska Institutet, Stockholm, Sweden  
30

31 <sup>6</sup>R&D Unit, Stockholms Sjukhem, Stockholm, Sweden  
32  
33  
34  
35  
36  
37  
38  
39  
40  
41  
42  
43  
44  
45  
46  
47  
48  
49  
50  
51  
52  
53  
54  
55  
56  
57  
58  
59  
60

**Corresponding author:**

Ann-Helen Patomella, Department of Neurobiology, Care Sciences and Society, Division of Occupational Therapy, Karolinska Institutet, Stockholm, Sweden

Email address: ann-helen.patomella@ki.se

Phone number: +46 852483726

\* I, the Submitting Author has the right to grant and does grant on behalf of all authors of the Work (as defined in the below author licence), an exclusive licence and/or a non-exclusive licence for contributions from authors who are: i) UK Crown employees; ii) where BMJ has agreed a CC-BY licence shall apply, and/or iii) in accordance with the terms applicable for US Federal Government officers or employees acting as part of their official duties; on a worldwide, perpetual, irrevocable, royalty-free basis to BMJ Publishing Group Ltd ("BMJ") its licensees and where the relevant Journal is co-owned by BMJ to the co-owners of the Journal, to publish the Work in BMJ Open and any other BMJ products and to exploit all rights, as set out in our licence.

The Submitting Author accepts and understands that any supply made under these terms is made by BMJ to the Submitting Author unless you are acting as an employee on behalf of your employer or a postgraduate student of an affiliated institution which is paying any applicable article publishing charge ("APC") for Open Access articles. Where the Submitting Author wishes to make the Work available on an Open Access basis (and intends to pay the relevant APC), the terms of reuse of such Open Access shall be governed by a Creative Commons licence – details of these licences and which Creative Commons licence will apply to this Work are set out in our licence referred to above.

**Word count:** 3839 (excluding title page, abstract, references, and table).

**Protocol version:** 27<sup>th</sup> May 2019. Version 1.0

**Trial Registration number:** ClinicalTrials.gov Identifier: NCT03730701

## **Abstract**

### Introduction

Stroke is a globally common disease that has detrimental effects on the individual and, more broadly, on society. Lifestyle change can contribute to reducing risk factors for stroke.

Although there are direct benefits of a healthy lifestyle, sustaining and incorporating healthy activities into everyday life is a challenge. Engaging everyday activities have the potential to support lifestyle change and promote sustainable activity patterns. Current healthcare is failing to reduce modifiable risk factors in people at risk, and in addition to current practice, there is a need for systematic and efficient non-pharmacological and non-surgical stroke prevention strategies. The aim of the pilot study is to increase knowledge about the effects of a prevention programme and its feasibility to promote sustainable and healthy activity patterns among persons at risk for stroke.

### Methods and analysis

The proposed pilot study will be a two-armed randomised, assessor-blinded, parallel pilot trial. The study will include feasibility data, investigating acceptability and delivery of the intervention. Persons at risk of stroke (n=60) will be included in a mobile phone-supported prevention programme. The 10-week programme will be conducted at primary healthcare clinics, combining group meetings and online resources to support self-management of lifestyle change. Main outcomes are stroke risk, lifestyle habits and healthy activity pattern. Assessments will be performed at baseline and at follow-up (immediately following the end of the programme and at 6 and 12 months). Effects of the programme will be analysed using inferential statistics. Feasibility will be analysed using both qualitative and quantitative methods.

### Ethics and dissemination

The study has been approved by the Regional Ethical Review Board in Stockholm, Sweden, being granted Ref. Nos. 2015/834-31, 2016/2203-32 and 2019/01444. Study results will be disseminated through peer-review journals and presentations to mixed audiences at regional and international conferences.

## Article Summary

### Strengths and limitations of this study

- A major strength of the proposed study is the utilisation of engaging everyday activities as a mediator for sustainable lifestyle change.
- The study is designed as a randomised controlled trial and will provide preliminary data on the effects of a prevention programme for persons at risk of stroke.
- Mobile phone technology will be used to support lifestyle change processes among participants.
- The combination of qualitative and quantitative data systematically collected before and after the intervention period will provide rich data, which is useful for analysing the feasibility of the programme and its impact on the health and well-being of persons at risk of stroke.
- A limitation of the study is a relatively small sample size, which can result in insufficient power to determine effects.

## INTRODUCTION

Stroke is the third-leading cause of the global disease burden based on disability-adjusted life years (DALYs), which is a measure of years lost due to death, poor health or disability (1). The residual effects of stroke detrimentally impact on quality of life in terms of limiting physical, social, and emotional health both for persons with stroke and their caregivers (2). Subsequently, the economic impact of stroke is estimated at 76,000 Euros for the first 2 years after the event, not including indirect costs such as loss of income and family burden (1). The magnitude of the problem can be put into context, considering evidence that suggests that many of the risk factors for stroke and other cardiovascular events are modifiable: tobacco use, excessive alcohol consumption, type 2 diabetes, hypertension, physical inactivity and dietary intake leading to high cholesterol and/or obesity (1, 3). Meaningful and purposeful everyday activities combined with moderate physical activities and a healthy diet has been found to be strongly related to well-being and longevity (4, 5). However, a recent focus-group study with general practitioners in a Swedish primary healthcare context revealed that there was a lack of systematic screening of stroke risk and adherence to risk factor modification was rare (6).

### Theoretical concept of the prevention program

The prevention program in this study is a theoretically grounded, complex intervention (7). The programme is based on activities in people's everyday lives and integrates health and well-being with what people do, as well as with what they want or need to do, in order to thrive and live well (8, 9).

In this protocol, the term lifestyle is used to conceptualize and define activity patterns (individual actions and behaviour) in everyday life that may or may not contribute to health. Lifestyle change refers to a conscious change of behaviour and everyday activities in order to promote health. The process of changing behaviour results from an interaction between the person (e.g. self-efficacy), the environment (support and material) and the action (10). In the project, the key behavioural change technique (11), is incorporating engaging everyday activities (EEA) that contribute to a healthy lifestyle. This might include changing the form of current EEAs or finding new health-promoting EEAs.

### *Engaging everyday activity – a game-changer*

Although the benefits of healthy lifestyle are clear (3, 12) the long-term effect and maintenance of healthy lifestyle are not (13-16). The effectiveness of primary healthcare-based physical activity's interventions are inconclusive (17). There is evidence for short-term improvements, but there is a lack of evidence for long-term effects (14). Successfully and

1  
2  
3 sustainably incorporating healthy lifestyle patterns into everyday life is a challenge for many  
4 people. Engaging everyday activities (EEA) are seen as the means and goal for changing  
5 and sustaining a healthy lifestyle. EEAs occur in the interaction between the individual and  
6 the sociocultural setting (18). EEAs are personal activities done regularly and seen by the  
7 individual as valuable, meaningful and purposeful, as well as providing an intense sense of  
8 participation (19). EEAs can go beyond personal pleasure and can have a higher level of  
9 importance due to meaning for others such as family, friends or society at large. EEAs are  
10 the things that people do that make life worth living and that can contribute to well-being (9,  
11 19, 20). Studies have shown that promoting EEAs can have positive health impacts for older  
12 adults (8, 18, 21, 22). However, EEAs can also lead to ill health in cases where the EAA  
13 contributes to the sedimentation of risk factors in everyday life. Although EEAs can be a key  
14 to incorporating change and sustainable healthy lifestyle choices to reduce the risk for stroke,  
15 there is a need to systematically explore this further.  
16  
17  
18  
19  
20  
21  
22  
23

### 24 *Sharing personal experiences as part of a change process*

25  
26  
27 The intervention in the present study espouses the idea that personal experiences should be  
28 the point of departure for a person-centred prevention programme, enabling individual  
29 autonomy in decisions regarding lifestyle change. Sharing experiences, shared activities and  
30 reflections lead to learning about one's own stroke risk, activity patterns and habits. Bryan  
31 and colleagues (23) have used theories to summarise five central principles for adult  
32 learning: a) adults need to know why they are learning; b) adults need to be motivated to  
33 learn by the need to solve problems; c) adults' previous experiences must be respected and  
34 built upon; d) learning approaches should match adults' backgrounds and diversity; e) adults  
35 need to be actively involved in the learning process. The programme will be tailored to match  
36 needs and competences of the individual and build on participants' previous experiences. In  
37 addition to increase literacy with regard to stroke risk and change, there is a need to learn  
38 how to use digital support systems efficiently. Participants in the study will be actively  
39 involved in setting their own goals because this is important in order to manage their health  
40 while following the programme.  
41  
42  
43  
44  
45  
46  
47  
48

### 49 **Objectives of the proposed study**

50  
51  
52 The aim is to gain knowledge concerning the effectiveness of a prevention programme in  
53 promoting sustainable and healthy activity patterns and enabling lifestyle change together  
54 with and among people at risk of stroke. The study's aim is also to gain knowledge about the  
55 feasibility and usefulness of a research protocol that includes a mobile phone application  
56 (app).  
57  
58  
59  
60



## METHODS AND ANALYSIS

### Design

The pilot study will be a two-armed randomised, assessor-blinded, parallel pilot trial. The protocol also includes a feasibility study combining qualitative interviews and descriptive quantitative data, investigating the acceptability and delivery of the intervention (24).

### Study setting

The study will be conducted in close collaboration with Primary healthcare clinics (PHC) in the Stockholm area (different parts of Stockholm in order to reach a diverse population of healthcare seekers) and in PHCs in both urban and rural areas in the County Council of Gävleborg.

### Sample size and power considerations

This study is an explorative pilot and feasibility study; no statistical power analyses have been calculated. It is estimated that a total of four PHCs will participate, (two from Stockholm, two from Gävleborg) each running an intervention group with 8-10 participants. A drop-out rate of 20% is expected, resulting in a total of n= 26 in the intervention and control groups, respectively.

### Participant timeline

Participant enrolment will be started in June 2019 and the last qualitative interview is scheduled for before June 2020. During this period, 60 participants are expected to be enrolled in the study (30 controls and 30 in the intervention group).

### Participants: Eligibility criteria

Persons at risk of stroke will be included in the project and recruitment will be by means of advertisements in local newspapers, webpage and at PHCs. A stroke risk screening survey (potential participants are either self-screened online or screened by a professional at their PHC) will be used to find eligible participants. A total sample of n=60 participants (persons at risk of stroke), divided into two arms (30+30) intervention and controls is estimated. Block randomisation will be utilised with a block size of four (2 control=A and 2 intervention=B, with blocks of 4 having random block orders: AABB, ABAB, ABBA, BABA, BAAB, and BBAA) to allocate patients to either the intervention or the control group (25). Inclusion criteria are that the participants a) have a high risk for stroke according to the Stroke Risk Score card (26), b) are motivated for lifestyle change and for participating in a digital lifestyle prevention (including the use of a smart phone or tablet), c) are between 45-70 years old and without a diagnosis of dementia or cognitive impairment hindering participation. Exclusion criteria are

1  
2  
3 having previously had a Stroke or TIA diagnosis and lack of understanding the Swedish  
4 language.  
5

6  
7 The researchers will encourage and guide any participant who experiences health-related  
8 problems during the programme to get in contact with his or her general practitioner, GP.  
9  
10 Participants may choose to interrupt their participation in the study at any time. The  
11 researcher can also discontinue a participant's participation based on health issues or  
12 reasons that might jeopardize that person's safety. Reasons for interruption will be recorded.  
13  
14

### 15 16 **Active Lifestyle – a stroke-prevention programme**

17 The prevention programme is based on earlier research evidence and theoretical  
18 underpinnings as presented, and on preliminary studies conducted by the research group  
19 (6). The inter-professional research group together with health professionals and technicians  
20 had a total of four workshops during 2015-2017 with the aim of modelling the components  
21 and themes of the programme. A logic model (27) was created in order to plan and organise  
22 the intervention. The logic model was used to visualise possible conflicts, barriers,  
23 contradictions, needed resources, activities, outputs and impacts of the research process.  
24  
25

26  
27 The Active Lifestyle prevention programme enables healthy activity patterns and aims to  
28 reduce the risk of stroke by means of four strategies: a) the incorporation of health-promoting  
29 EEAs, b) the use of mobile phone technology to increase health literacy and awareness of  
30 current habits c) forming new habits that prompt conscious decisions to make healthy  
31 choices, and d) setting realistic goals and sharing experience in a learning environment.  
32  
33  
34  
35  
36  
37  
38

### 39 *Duration and specific content of the intervention programme*

40  
41 The Active Lifestyle stroke-prevention programme is a 10-week programme. The intervention  
42 will include 5 sessions over 5 weeks with a booster session 5 weeks later. The programme  
43 starts with an individual meeting (baseline) and with a follow-up meeting one week after the  
44 last group session. The participants in the intervention group will set three self-chosen goals  
45 for lifestyle change formulated as daily goals based on an interview done at baseline using  
46 the Canadian Occupational Performance Measure (28). During the intervention, participants  
47 will work actively with both EEAs and habits in order to change behaviour and lifestyle. For  
48 example, a person may have reading as an EEA, an activity that is relatively neutral on a  
49 continuum of health-promotion. The activity might be experienced as engaging and  
50 meaningful, and contribute to psychological wellbeing, but a redesign of the activity could be  
51 walking or exercising at the gym while listening to an audio book, leading to health benefits  
52 which could be accepted and incorporated into the individual's activity patterns. During the  
53  
54  
55  
56  
57  
58  
59  
60

programme, the participants will become aware of their current lifestyle habits as well as new habits that are formed by the participants themselves. New habits may be cued by situations (such as seeing an escalator) prompting a health-promoting behaviour and making a conscious decision (e.g. to take the stairs) (29).

Each module has a theme and relevant activities. Group dynamics are used to reflect on experiences, doing and future goals. The modules, presented in table 1, are delivered by an interventionist/researcher together with a trained health professional (training during two half-days), for example an occupational therapist, physiotherapist or dietician.

Table 1: Summary of module themes, concepts and activities supporting a change process

| Module theme                                                                                        | Concepts                                                                                  | Activity                                                                                                  |
|-----------------------------------------------------------------------------------------------------|-------------------------------------------------------------------------------------------|-----------------------------------------------------------------------------------------------------------|
| 1: Risk factors for stroke and engaging activities                                                  | Health literacy concerning stroke risk, engaging activities, change process, expectations | Peer interview on engaging activities. Learn how to register in the app. Set three lifestyle change goals |
| 2: Physical activity                                                                                | Physical activity, physical inactivity                                                    | Try a physical group exercise class at a gym                                                              |
| 3: Diet and health                                                                                  | Dietary routines and change                                                               | Prepare and test a healthy sandwich                                                                       |
| 4: Balanced everyday life                                                                           | Activity balance, stress                                                                  | Relaxation, for example medical yoga                                                                      |
| 5: Sustained health: routines and activity patterns                                                 | Current and desired routines and activity patterns, revisiting goals                      | Walking session                                                                                           |
| Booster session: "Future horizon", identity, self-management of health and social aspects of health | Self-management, view of the self, social support                                         | Preparing healthy snacks and walking and talking in a park                                                |

### *The mobile phone app*

The app for the project was developed in close collaboration with ScientificMed Tech AB (<http://www.scientificmed.com>). ScientificMed Tech has a solid track record with publications on similar platforms (30, 31). The digital platform includes several unique aspects in the data input logic, which contributes to immediate feedback on progress as well as tracking of personally tailored goals related to stroke risk in the context of everyday life. The app includes six domains for registering daily activities, experiences and behaviours: Goal achievements (questions on how well the person has achieved the three pre-set goals and self-efficacy), Physical activity (registering step counts, registering 24 hr time use in relation to exercise, moderate intense activities, sleep, sedentary activities and other activities), Engaging everyday activities (participating in EEAs and self-efficacy), Tobacco and alcohol use (registering consumption), Stress levels (questions about perceived time-pressure) and Dietary habits (registering consumption of fruits/vegetables, breakfast, fish and snacks). Registrations result in graphs and plots that inform the participant of current behaviours and which serve as feedback on habits. The six domains are based on modifiable risk factors for stroke as presented by the American Heart Association (3) with the addition of promoting EEAs and reducing stress. The purpose of the app is to support the participant's change process via registration, feedback and self-management of habits and behaviours that impact on health and risk of stroke. Novice technology users will have extra training in the use of the technology and the app.

The control group will be offered standard care by the PHCs. During baseline assessment, all participants will be informed of their stroke risk factors and given a leaflet with advice on how to manage modifiable risk factors.

### **Data collection**

All of the instruments measuring primary and secondary outcomes will be collected at baseline, at follow-up and at 6 and 12 months. Demographic data will be collected at baseline. All qualitative interviews will be semi-structured and an interview guide will be used. Interviews will be digitally recorded.

### *Background and demographic data*

Background data will include: weight, height (in order to calculate Body Mass Index) and blood pressure. Survey data will be gathered for health literacy of stroke risk (32), experiences of time pressure (stress), readiness and motivation for change (33), current mobile phone use and mapping out engaging everyday activities.

### *Feasibility data*

A combination of qualitative and quantitative data will be collected among the interventionists and the participants using surveys, log books and qualitative interviews. In order to investigate acceptability of the programme, there will be analysis of patient recruitment, data collection, assessment tools, digital platforms and procedures. Items from the System Usability Scale (34) will be used to investigate ease of use of the Active Lifestyle app. In addition, usage-tracking tools and usage analytics will be used to obtain indicators of the feasibility and acceptability of the app. Data will include participants' daily self-reports and check-ins for ratings (e.g. goal-achievements, daily activities and dietary habits). Semi-structured qualitative exit interviews will be conducted by a researcher not involved in developing and delivering the intervention programme in order to investigate the acceptability of the programme. Participants (persons at risk of stroke) and healthcare professionals delivering the programme will be invited to participate in individual and focus-group exit interviews.

### *Outcome data*

The primary outcome measures will be stroke risk, lifestyle habits and healthy activity patterns. Stroke risk is measured using the Stroke Risk Score card (26). The Stroke risk score card was developed as an easy to use self-assessment tool by the National Stroke Association in United Kingdom. The tool has been used in a few studies to detect risk factors for stroke (35, 36). The Stroke Risk Scorecard was chosen over other stroke risk screening tools as it includes modifiable risk factors for stroke and is easy to score for participants. Lifestyle habits will be measured using a lifestyle habits survey. The Swedish Lifestyle habits survey is based on guidelines for prevention by the National Board of Health and Welfare in Sweden (37), with the aim of registering and treating unhealthy lifestyle habits in primary healthcare. The survey includes questions in four domains: physical activity, alcohol consumption, tobacco use and dietary intake. Healthy activity patterns are measured using the Pleasure, Productivity and Restoration profile (38, 39) extended with a health domain and will map out the participants' everyday activity repertoire.

### *Secondary outcomes*

Secondary outcomes will measure life satisfaction, quality of life, activity balance and activity performance and satisfaction. LiSat-11 measures life satisfaction (40). EQ-5D will be used to measure quality of life (41). The participants' level of occupational balance will be measured with the Occupational Balance Questionnaire (OBQ), giving insight into yet another perspective of the implications of how activities of everyday life can impact health (42). The

1  
2  
3 Canadian Occupational Performance Measure (COPM) measures subjective performance  
4 and satisfaction with individually chosen activities (28). COPM will be used to measure EEAs  
5 that the participants find difficult to perform and will guide the formulation of lifestyle change  
6 goals. The COPM scores importance, performance and satisfaction in chosen activities and  
7 upholds psychometric properties of validity and reliability (43, 44). The 6 Minute Walk Test  
8 will be used to measure physical function (45).  
9  
10  
11  
12  
13

## 14 **Data Analysis Plan**

### 15 *Feasibility of the intervention*

16 Data collected from surveys, log books on recruitment and dropout, and logs from the app  
17 registrations will be entered, analysed and summarised. To promote data quality range  
18 checks for data values will be conducted. Descriptive statistical analyses will be conducted in  
19 order to report on feasibility of the study: recruitment, drop-outs, retention rate and  
20 adherence. Data from app registrations will be used to report on how the participants use the  
21 app, and on trends and goal achievements. Other app-related information of interest is the  
22 need for technical assistance. The investigators will assess patterns of app use over time.  
23 Conditions and events facilitating and/or hindering the delivery of the sessions and potential  
24 complications will be registered by the researchers and interventionists and presented.  
25 Qualitative interviews will be transcribed verbatim. All identifying factors will be removed (i.e.  
26 names) during transcription. Copies of the digital recordings will be destroyed after  
27 transcription is completed. Interview transcriptions will be stored in the university's database.  
28 Qualitative materials will be analysed using thematic qualitative analyses (46).  
29  
30  
31  
32  
33  
34  
35  
36  
37  
38

### 39 *Evaluation of outcomes*

40 The preliminary treatment effects will be analysed on an intention-to-treat basis, with  
41 randomised participants retaining their original allocated group, and measured as differences  
42 between groups at follow-up and at 12 months. The study data will be examined for outliers,  
43 normality and missing data. Analyses of covariance will be used for continuous outcomes  
44 with baseline values as covariates. Logistic regression analyses will be used for dichotomous  
45 outcomes. The level of significance will be set at  $p \leq 0.05$  and the confidence level at 95%.  
46 We will use the SPSS (Version 22.0) to analyse the data. These analyses will provide  
47 preliminary results for the relative effectiveness of the intervention programme and will inform  
48 subsequent randomised controlled trials. Data from participants lost to follow-up will be used  
49 for descriptive purposes to describe the group, but removed from analysis of preliminary  
50 treatment effects.  
51  
52  
53  
54  
55  
56  
57  
58  
59  
60

## **Patient and Public Involvement**

A previous case study including six persons following transient ischemic attack (TIA) and at risk of stroke was conducted in order to test the intervention model and to identify the needs and experiences of the participants. The content of the current intervention is based on the feasibility of the intervention given to the TIA group and adjusted in relation to the participants' experiences, needs and preferences. Experiences of the participants in the proposed pilot study of managing the app (e.g. challenges, suggested changes, layout, and period of utilisation) and their experiences of the research protocol and procedures will be used to inform and redesign any future version of the app and the study protocol (before a full scale RCT). The qualitative data from the interviews will report the participants' experiences of taking part in the programme.

## **Discussion**

The theoretical base of the protocol is strong and based on EEA's as the mediator and goal for decreasing the risk of stroke and living a healthy life. Mobile phone technology is enabling the change process by offering individual feedback and an increasing awareness of current lifestyle and registration of new habits. This pilot study will provide preliminary data on the effects and feasibility of the Active Lifestyle prevention programme and its measures and procedures. Rich data on the impact and experiences of the programme will be provided from semi-structured interviews, log books, app registrations, outcome measures and surveys. The strength of the study lies in the robustness of the RCT design. The small sample size will limit the study's ability to determine effects of the protocol, however the main aim of the pilot study is not just to determine effects, but also to investigate procedures and feasibility, and so the sample size is considered to be sufficient in order to test the protocol in the primary healthcare setting.

## **ETHICS AND DISSEMINATION**

The project invites and includes people at risk of stroke who, in different ways, may be faced with vulnerable situations due to their health and lifestyle. This invitation may be perceived as both an unwanted reminder of potential health complications such as stroke, while at the same time offering participation in developing a preventive programme with the aim of reducing the risk. The strength is that study participation is offered to the individual, who may or may not choose to respond. The potential participant will be informed both verbally and in writing and given a chance to ask questions before the researcher asks for written informed consent. An approval from the Regional Ethical Review Board in Stockholm, Sweden has been granted (Ref. Nos. 2015/834-31, 2016/2203-32 and 2019/01444). In accordance with the general data protection regulation, GDPR, the participants will be informed of their right

1  
2  
3 to withdraw at any time and of how their data will be managed. All data will be stored  
4 securely and all participant information will be stored and locked with limited access. All  
5 records will be identified by a coded number. The code number will be stored separately. All  
6 local databases will be password-protected. To ensure confidentiality, data shared to project  
7 team members will be blinded of any identifying participant information. Study participation is  
8 not expected to lead to risks or complications, although stroke risk factors will be monitored  
9 and possible health consequences will be transferred to the regional primary healthcare, it is  
10 expected to support the participating person's health self-management. The findings will be  
11 published in peer-reviewed journals. The results will also be presented to participants, staff  
12 and decision-makers involved in the study, other healthcare professionals and the general  
13 public through national and international conferences.  
14  
15  
16  
17  
18  
19  
20  
21

### 22 **AUTHOR CONTRIBUTIONS**

23 AHP, EA and SG conceived the original idea and outline of the study. EM is implementing  
24 the protocol in primary healthcare settings, with oversight and review by AHP, EA and SG.  
25 AK, AB, CE and EÅ contributed to the design of the study. AHP wrote the study protocol  
26 together with EA, SG and AB. All authors discussed and commented on draft versions and  
27 approved the final version. The group would also like to acknowledge Professor Kerstin  
28 Tham, Malmö University for initiating the project and for developing the conceptual ideas of  
29 EEA in stroke prevention.  
30  
31  
32  
33  
34  
35

### 36 **FUNDING STATEMENT**

37 This work was funded by grants from Vårdal Foundation, grant nr 2014-0108 and from the  
38 research school of Health Care Science, Karolinska Institutet. This funding source had no  
39 role in the design of this study and will not have any role during its execution, analyses,  
40 interpretation of the data, or decision to submit results.  
41  
42  
43  
44

### 45 **COMPETING INTERESTS**

46 The authors declare that they have no competing interests.  
47  
48  
49  
50  
51  
52  
53  
54  
55  
56  
57  
58  
59  
60



## REFERENCES

1. Habner J. Preventing stroke: Uneven progress. A global policy research programme. 2017.
2. Bergstrom AL, Eriksson G, von Koch L, Tham K. Combined life satisfaction of persons with stroke and their caregivers: associations with caregiver burden and the impact of stroke. *Health and quality of life outcomes*. 2011;9:1.
3. Goldstein LB, Bushnell CD, Adams RJ, Appel LJ, Braun LT, Chaturvedi S, et al. Guidelines for the primary prevention of stroke: a guideline for healthcare professionals from the American Heart Association/American Stroke Association. *Stroke*. 2011;42(2):517-84.
4. Poulain M, Herm A, Pes G. The Blue Zones: areas of exceptional longevity around the world. *Vienna Yearbook of Population Research*. 2013;11(1):87.
5. Steptoe A, Deaton A, Stone AA. Psychological wellbeing, health and ageing. *Lancet (London, England)*. 2015;385(9968):640.
6. Patomella A-H, Mickols G, Asaba E, Nilsson G, Fridén C, Kottorp A, et al. General practitioners' reasoning on risk screening and primary prevention of stroke – a focus group study. *BMC family practice*. 2018;19(1):190.
7. Craig P, Dieppe P, Macintyre S, Michie S, Nazareth I, Petticrew M, et al. Developing and evaluating complex interventions: the new Medical Research Council guidance. *BMJ*. 2008;337:a1655.
8. Clark F, Azen SP, Zemke R, Jackson J, Carlson M, Mandel D, et al. Occupational therapy for independent-living older adults: A randomized controlled trial. *Jama*. 1997;278(16):1321-6.
9. Asaba E, Patomella A-H, Guidetti S, Kottorp A, Tham K. Att främja hälsa och förebygga ohälsa genom engagerande aktiviteter: Ett exempel från prevention av stroke. In: Kroksmark U, editor. *Hälsa och Aktivitet i Vardagen - ur ett arbetsterapeutiskt perspektiv*. Nacka: Sveriges Arbetsterapeuter; 2018.
10. Bandura A. Self-efficacy: toward a unifying theory of behavioral change. *Psychol Rev*. 1977;84(2):191-215.
11. Michie S, Johnston M. Theories and techniques of behaviour change: Developing a cumulative science of behaviour change. *Health Psychology Review*. 2012;6(1):1-6.
12. Chiuve SE, Rexrode KM, Spiegelman D, Logroscino G, Manson JE, Rimm EB. Primary prevention of stroke by healthy lifestyle. *Circulation*. 2008;118(9):947.
13. Taylor AH, Cable NT, Faulkner G, Hillsdon M, Narici M, Van Der Bij AK. Physical activity and older adults: a review of health benefits and the effectiveness of interventions. *Journal of Sports Sciences*. 2004;22(8):703-25.
14. Eakin EG, Glasgow RE, Riley KM. Review of primary care-based physical activity intervention studies. *Journal of Family Practice*. 2000;49(2):158-.
15. Müller-Riemenschneider F, Reinhold T, Nocon M, Willich SN. Long-term effectiveness of interventions promoting physical activity: a systematic review. *Preventive medicine*. 2008;47(4):354-68.
16. Weiss EC, Galuska DA, Khan LK, Gillespie C, Serdula MK. Weight regain in US adults who experienced substantial weight loss, 1999–2002. *American journal of preventive medicine*. 2007;33(1):34-40.
17. Hillsdon M, Thorogood M, White I, Foster C. Advising people to take more exercise is ineffective: a randomized controlled trial of physical activity promotion in primary care. *International journal of epidemiology*. 2002;31(4):808-15.
18. Jackson J, Carlson M, Mandel D, Zemke R, Clark F. Occupation in lifestyle redesign: The well elderly study occupational therapy program. *The American Journal of Occupational Therapy*. 1998;52(5):326-36.
19. Jonsson H. A new direction in the conceptualization and categorization of occupation. *Journal of Occupational Science*. 2008;15(1):3-8.

- 1
  - 2
  - 3
  - 4
  - 5
  - 6
  - 7
  - 8
  - 9
  - 10
  - 11
  - 12
  - 13
  - 14
  - 15
  - 16
  - 17
  - 18
  - 19
  - 20
  - 21
  - 22
  - 23
  - 24
  - 25
  - 26
  - 27
  - 28
  - 29
  - 30
  - 31
  - 32
  - 33
  - 34
  - 35
  - 36
  - 37
  - 38
  - 39
  - 40
  - 41
  - 42
  - 43
  - 44
  - 45
  - 46
  - 47
  - 48
  - 49
  - 50
  - 51
  - 52
  - 53
  - 54
  - 55
  - 56
  - 57
  - 58
  - 59
  - 60
20. Asaba E, Bergstrom A, Patomella A-H, Guidetti S. Engaging occupations among persons at risk for stroke: A health paradox. Submitted.
21. Clark F, Jackson J, Carlson M, Chou C-P, Cherry BJ, Jordan-Marsh M, et al. Effectiveness of a lifestyle intervention in promoting the well-being of independently living older people: results of the Well Elderly 2 Randomised Controlled Trial. *Journal of epidemiology and community health*. 2012;66(9):782-90.
22. Mountain G, Windle G, Hind D, Walters S, Keertharuth A, Chatters R, et al. A preventative lifestyle intervention for older adults (lifestyle matters): a randomised controlled trial. *Age and ageing*. 2017;46(4):627-34.
23. Bryan RL, Kreuter MW, Brownson RC. Integrating adult learning principles into training for public health practice. *Health promotion practice*. 2009;10(4):557-63.
24. O’Cathain A, Hoddinott P, Lewin S, Thomas KJ, Young B, Adamson J, et al. Maximising the impact of qualitative research in feasibility studies for randomised controlled trials: guidance for researchers. *Pilot and feasibility studies*. 2015;1(1):32.
25. Sedgwick P. Block randomisation. *BMJ*. 2011;343:d7139.
26. Association NS. Stroke Risk Score Card 2018 [Available from: <https://www.stroke.org/stroke-risk-scorecard-2018/>].
27. Foundation WK. WK Kellogg Foundation logic model development guide: WK Kellogg Foundation; 2004.
28. Law M, Baptiste S, McColl M, Opzoomer A, Polatajko H, Pollock N. The Canadian occupational performance measure: an outcome measure for occupational therapy. *Canadian Journal of Occupational Therapy*. 1990;57(2):82-7.
29. Gardner B. A review and analysis of the use of ‘habit’ in understanding, predicting and influencing health-related behaviour. *Health Psychology Review*. 2015;9(3):277-95.
30. Nyström CD, Sandin S, Henriksson P, Henriksson H, Trolle-Lagerros Y, Larsson C, et al. Mobile-based intervention intended to stop obesity in preschool-aged children: the MINISTOP randomized controlled trial. *The American Journal of Clinical Nutrition*. 2017:1-7.
31. Johnston N, Bodegard J, Jerström S, Åkesson J, Brorsson H, Alfredsson J, et al. Effects of interactive patient smartphone support app on drug adherence and lifestyle changes in myocardial infarction patients: A randomized study. *American Heart Journal*. 2016;178:85-94.
32. Dearborn JL, McCullough LD. Perception of risk and knowledge of risk factors in women at high risk for stroke. *Stroke*. 2009;40(4):1181-6.
33. Prochaska JO, Redding CA, Evers KE. The transtheoretical model and stages of change. *Health behavior: Theory, research, and practice*. 2015:125-48.
34. Brooke J. SUS-A quick and dirty usability scale. *Usability evaluation in industry*. 1996;189(194):4-7.
35. Aycock DM, Kirkendoll KD, Coleman KC, Clark PC, Albright KC, Alexandrov AW. Family history of stroke among African Americans and its association with risk factors, knowledge, perceptions, and exercise. *The Journal of cardiovascular nursing*. 2015;30(2):E1.
36. Anderson J, Godwin KM, Petersen NJ, Willson P, Kent TA. A pilot test of videoconferencing to improve access to a stroke risk-reduction programme for Veterans. *Journal of telemedicine and telecare*. 2013;19(3):153-9.
37. Socialstyrelsen. Nationella riktlinjer för prevention och behandling vid ohälsosamma levnadsvanor. 2018.
38. Adler KE. User-perceived utility of the Daily Experiences of Pleasure, Productivity, and Restoration Profile. *Can J Occup Ther*. 2015;82(4):235-44.
39. Adler KE, Barney L, Moravec A, Sample PL, Fruhauf CA. The Daily Experiences of Pleasure, Productivity, and Restoration Profile: A case study: Etude de cas sur l'utilite du Daily Experiences of Pleasure, Productivity, and Restoration Profile. *Can J Occup Ther*. 2017;84(4-5):262-72.

- 1  
2  
3 40. Fugl-Meyer AR, Melin R, Fugl-Meyer KS. Life satisfaction in 18-to 64-year-old Swedes:  
4 in relation to gender, age, partner and immigrant status. *Journal of rehabilitation medicine*.  
5 2002;34(5):239-46.  
6 41. Burström K, Johannesson M, Diderichsen F. Swedish population health-related quality  
7 of life results using the EQ-5D. *Quality of life research*. 2001;10(7):621-35.  
8 42. Wagman P, Håkansson C. Introducing the occupational balance questionnaire (OBQ).  
9 *Scandinavian journal of occupational therapy*. 2014;21(3):227-31.  
10 43. Dedding C, Cardol M, Eyssen ICJM, Beelen A. Validity of the Canadian Occupational  
11 Performance Measure: a client-centred outcome measurement. *Clinical Rehabilitation*.  
12 2004;18(6):660-7.  
13 44. Cup EH, op Reimer WS, Thijssen MC, van Kuyk-Minis M. Reliability and validity of the  
14 Canadian Occupational Performance Measure in stroke patients. *Clinical rehabilitation*.  
15 2003;17(4):402.  
16 45. Enright PL, Sherrill DL. Reference equations for the six-minute walk in healthy adults.  
17 *American journal of respiratory and critical care medicine*. 1998;158(5):1384-7.  
18 46. Charmaz K. *Constructing grounded theory: A practical guide through qualitative*  
19 *analysis*: Sage; 2006.  
20  
21  
22  
23  
24  
25  
26  
27  
28  
29  
30  
31  
32  
33  
34  
35  
36  
37  
38  
39  
40  
41  
42  
43  
44  
45  
46  
47  
48  
49  
50  
51  
52  
53  
54  
55  
56  
57  
58  
59  
60

# Reporting checklist for protocol of a clinical trial.

Based on the SPIRIT guidelines.

## Instructions to authors

Complete this checklist by entering the page numbers from your manuscript where readers will find each of the items listed below.

Your article may not currently address all the items on the checklist. Please modify your text to include the missing information. If you are certain that an item does not apply, please write "n/a" and provide a short explanation.

Upload your completed checklist as an extra file when you submit to a journal.

In your methods section, say that you used the SPIRIT reporting guidelines, and cite them as:

Chan A-W, Tetzlaff JM, Altman DG, Laupacis A, Gøtzsche PC, Krleža-Jerić K, Hróbjartsson A, Mann H, Dickersin K, Berlin J, Doré C, Parulekar W, Summerskill W, Groves T, Schulz K, Sox H, Rockhold FW, Rennie D, Moher D. SPIRIT 2013 Statement: Defining standard protocol items for clinical trials. *Ann Intern Med.* 2013;158(3):200-207

|                                   |                     | Reporting Item                                                                                               | Page Number                          |
|-----------------------------------|---------------------|--------------------------------------------------------------------------------------------------------------|--------------------------------------|
| <b>Administrative information</b> |                     |                                                                                                              |                                      |
| Title                             | <a href="#">#1</a>  | Descriptive title identifying the study design, population, interventions, and, if applicable, trial acronym | 1                                    |
| Trial registration                | <a href="#">#2a</a> | Trial identifier and registry name. If not yet registered, name of intended registry                         | 2                                    |
| Trial registration: data set      | <a href="#">#2b</a> | All items from the World Health Organization Trial Registration Data Set                                     | N/A a registration has not been done |
| Protocol version                  | <a href="#">#3</a>  | Date and version identifier                                                                                  | 2                                    |
| Funding                           | <a href="#">#4</a>  | Sources and types of financial, material, and other support                                                  | 13                                   |

|    |                      |                     |                                                     |               |
|----|----------------------|---------------------|-----------------------------------------------------|---------------|
| 1  | Roles and            | <a href="#">#5a</a> | Names, affiliations, and roles of protocol          | 13            |
| 2  | responsibilities:    |                     | contributors                                        |               |
| 3  | contributorship      |                     |                                                     |               |
| 4  |                      |                     |                                                     |               |
| 5  |                      |                     |                                                     |               |
| 6  | Roles and            | <a href="#">#5b</a> | Name and contact information for the trial          | N/A, no trial |
| 7  | responsibilities:    |                     | sponsor                                             | sponsor       |
| 8  | sponsor contact      |                     |                                                     |               |
| 9  | information          |                     |                                                     |               |
| 10 |                      |                     |                                                     |               |
| 11 |                      |                     |                                                     |               |
| 12 |                      |                     |                                                     |               |
| 13 | Roles and            | <a href="#">#5c</a> | Role of study sponsor and funders, if any, in       | N/A           |
| 14 | responsibilities:    |                     | study design; collection, management, analysis,     |               |
| 15 | sponsor and funder   |                     | and interpretation of data; writing of the report;  |               |
| 16 |                      |                     | and the decision to submit the report for           |               |
| 17 |                      |                     | publication, including whether they will have       |               |
| 18 |                      |                     | ultimate authority over any of these activities     |               |
| 19 |                      |                     |                                                     |               |
| 20 |                      |                     |                                                     |               |
| 21 |                      |                     |                                                     |               |
| 22 |                      |                     |                                                     |               |
| 23 | Roles and            | <a href="#">#5d</a> | Composition, roles, and responsibilities of the     | N/A           |
| 24 | responsibilities:    |                     | coordinating centre, steering committee,            |               |
| 25 | committees           |                     | endpoint adjudication committee, data               |               |
| 26 |                      |                     | management team, and other individuals or           |               |
| 27 |                      |                     | groups overseeing the trial, if applicable (see     |               |
| 28 |                      |                     | Item 21a for data monitoring committee)             |               |
| 29 |                      |                     |                                                     |               |
| 30 |                      |                     |                                                     |               |
| 31 |                      |                     |                                                     |               |
| 32 |                      |                     |                                                     |               |
| 33 | <b>Introduction</b>  |                     |                                                     |               |
| 34 |                      |                     |                                                     |               |
| 35 | Background and       | <a href="#">#6a</a> | Description of research question and justification  | 4-5           |
| 36 | rationale            |                     | for undertaking the trial, including summary of     |               |
| 37 |                      |                     | relevant studies (published and unpublished)        |               |
| 38 |                      |                     | examining benefits and harms for each               |               |
| 39 |                      |                     | intervention                                        |               |
| 40 |                      |                     |                                                     |               |
| 41 |                      |                     |                                                     |               |
| 42 |                      |                     |                                                     |               |
| 43 | Background and       | <a href="#">#6b</a> | Explanation for choice of comparators               | 9             |
| 44 | rationale: choice of |                     |                                                     |               |
| 45 | comparators          |                     |                                                     |               |
| 46 |                      |                     |                                                     |               |
| 47 |                      |                     |                                                     |               |
| 48 | Objectives           | <a href="#">#7</a>  | Specific objectives or hypotheses                   | 5             |
| 49 |                      |                     |                                                     |               |
| 50 |                      |                     |                                                     |               |
| 51 | Trial design         | <a href="#">#8</a>  | Description of trial design including type of trial |               |
| 52 |                      |                     | (eg, parallel group, crossover, factorial, single   |               |
| 53 |                      |                     | group), allocation ratio, and framework (eg,        |               |
| 54 |                      |                     | superiority, equivalence, non-inferiority,          |               |
| 55 |                      |                     | exploratory)                                        |               |
| 56 |                      |                     |                                                     |               |
| 57 |                      |                     |                                                     |               |
| 58 |                      |                     |                                                     |               |
| 59 |                      |                     |                                                     |               |
| 60 |                      |                     |                                                     |               |

1 **Methods:**

2 **Participants,**

3 **interventions, and**

4 **outcomes**

|    |                                 |                      |                                                                                                                                                                                                                                                                                                                                                                                |
|----|---------------------------------|----------------------|--------------------------------------------------------------------------------------------------------------------------------------------------------------------------------------------------------------------------------------------------------------------------------------------------------------------------------------------------------------------------------|
| 5  |                                 |                      |                                                                                                                                                                                                                                                                                                                                                                                |
| 6  |                                 |                      |                                                                                                                                                                                                                                                                                                                                                                                |
| 7  |                                 |                      |                                                                                                                                                                                                                                                                                                                                                                                |
| 8  | Study setting                   | <a href="#">#9</a>   | Description of study settings (eg, community clinic, academic hospital) and list of countries where data will be collected. Reference to where list of study sites can be obtained                                                                                                                                                                                             |
| 9  |                                 |                      | 6                                                                                                                                                                                                                                                                                                                                                                              |
| 10 |                                 |                      |                                                                                                                                                                                                                                                                                                                                                                                |
| 11 |                                 |                      |                                                                                                                                                                                                                                                                                                                                                                                |
| 12 |                                 |                      |                                                                                                                                                                                                                                                                                                                                                                                |
| 13 |                                 |                      |                                                                                                                                                                                                                                                                                                                                                                                |
| 14 | Eligibility criteria            | <a href="#">#10</a>  | Inclusion and exclusion criteria for participants. If applicable, eligibility criteria for study centres and individuals who will perform the interventions (eg, surgeons, psychotherapists)                                                                                                                                                                                   |
| 15 |                                 |                      | 6                                                                                                                                                                                                                                                                                                                                                                              |
| 16 |                                 |                      |                                                                                                                                                                                                                                                                                                                                                                                |
| 17 |                                 |                      |                                                                                                                                                                                                                                                                                                                                                                                |
| 18 |                                 |                      |                                                                                                                                                                                                                                                                                                                                                                                |
| 19 |                                 |                      |                                                                                                                                                                                                                                                                                                                                                                                |
| 20 |                                 |                      |                                                                                                                                                                                                                                                                                                                                                                                |
| 21 | Interventions: description      | <a href="#">#11a</a> | Interventions for each group with sufficient detail to allow replication, including how and when they will be administered                                                                                                                                                                                                                                                     |
| 22 |                                 |                      | 7-8                                                                                                                                                                                                                                                                                                                                                                            |
| 23 |                                 |                      |                                                                                                                                                                                                                                                                                                                                                                                |
| 24 |                                 |                      |                                                                                                                                                                                                                                                                                                                                                                                |
| 25 |                                 |                      |                                                                                                                                                                                                                                                                                                                                                                                |
| 26 | Interventions: modifications    | <a href="#">#11b</a> | Criteria for discontinuing or modifying allocated interventions for a given trial participant (eg, drug dose change in response to harms, participant request, or improving / worsening disease)                                                                                                                                                                               |
| 27 |                                 |                      | N/A                                                                                                                                                                                                                                                                                                                                                                            |
| 28 |                                 |                      |                                                                                                                                                                                                                                                                                                                                                                                |
| 29 |                                 |                      |                                                                                                                                                                                                                                                                                                                                                                                |
| 30 |                                 |                      |                                                                                                                                                                                                                                                                                                                                                                                |
| 31 |                                 |                      |                                                                                                                                                                                                                                                                                                                                                                                |
| 32 |                                 |                      |                                                                                                                                                                                                                                                                                                                                                                                |
| 33 |                                 |                      |                                                                                                                                                                                                                                                                                                                                                                                |
| 34 |                                 |                      |                                                                                                                                                                                                                                                                                                                                                                                |
| 35 | Interventions: adherence        | <a href="#">#11c</a> | Strategies to improve adherence to intervention protocols, and any procedures for monitoring adherence (eg, drug tablet return; laboratory tests)                                                                                                                                                                                                                              |
| 36 |                                 |                      | N/A                                                                                                                                                                                                                                                                                                                                                                            |
| 37 |                                 |                      |                                                                                                                                                                                                                                                                                                                                                                                |
| 38 |                                 |                      |                                                                                                                                                                                                                                                                                                                                                                                |
| 39 |                                 |                      |                                                                                                                                                                                                                                                                                                                                                                                |
| 40 |                                 |                      |                                                                                                                                                                                                                                                                                                                                                                                |
| 41 |                                 |                      |                                                                                                                                                                                                                                                                                                                                                                                |
| 42 | Interventions: concomitant care | <a href="#">#11d</a> | Relevant concomitant care and interventions that are permitted or prohibited during the trial                                                                                                                                                                                                                                                                                  |
| 43 |                                 |                      | N/A                                                                                                                                                                                                                                                                                                                                                                            |
| 44 |                                 |                      |                                                                                                                                                                                                                                                                                                                                                                                |
| 45 |                                 |                      |                                                                                                                                                                                                                                                                                                                                                                                |
| 46 | Outcomes                        | <a href="#">#12</a>  | Primary, secondary, and other outcomes, including the specific measurement variable (eg, systolic blood pressure), analysis metric (eg, change from baseline, final value, time to event), method of aggregation (eg, median, proportion), and time point for each outcome. Explanation of the clinical relevance of chosen efficacy and harm outcomes is strongly recommended |
| 47 |                                 |                      | 10                                                                                                                                                                                                                                                                                                                                                                             |
| 48 |                                 |                      |                                                                                                                                                                                                                                                                                                                                                                                |
| 49 |                                 |                      |                                                                                                                                                                                                                                                                                                                                                                                |
| 50 |                                 |                      |                                                                                                                                                                                                                                                                                                                                                                                |
| 51 |                                 |                      |                                                                                                                                                                                                                                                                                                                                                                                |
| 52 |                                 |                      |                                                                                                                                                                                                                                                                                                                                                                                |
| 53 |                                 |                      |                                                                                                                                                                                                                                                                                                                                                                                |
| 54 |                                 |                      |                                                                                                                                                                                                                                                                                                                                                                                |
| 55 |                                 |                      |                                                                                                                                                                                                                                                                                                                                                                                |
| 56 |                                 |                      |                                                                                                                                                                                                                                                                                                                                                                                |
| 57 |                                 |                      |                                                                                                                                                                                                                                                                                                                                                                                |
| 58 |                                 |                      |                                                                                                                                                                                                                                                                                                                                                                                |
| 59 |                                 |                      |                                                                                                                                                                                                                                                                                                                                                                                |
| 60 |                                 |                      |                                                                                                                                                                                                                                                                                                                                                                                |

|    |                                  |                      |                                                                                                                                                                                                                                                                                                                                                          |                      |
|----|----------------------------------|----------------------|----------------------------------------------------------------------------------------------------------------------------------------------------------------------------------------------------------------------------------------------------------------------------------------------------------------------------------------------------------|----------------------|
| 1  | Participant timeline             | <a href="#">#13</a>  | Time schedule of enrolment, interventions (including any run-ins and washouts), assessments, and visits for participants. A schematic diagram is highly recommended (see Figure)                                                                                                                                                                         | 6                    |
| 2  |                                  |                      |                                                                                                                                                                                                                                                                                                                                                          |                      |
| 3  |                                  |                      |                                                                                                                                                                                                                                                                                                                                                          |                      |
| 4  |                                  |                      |                                                                                                                                                                                                                                                                                                                                                          |                      |
| 5  |                                  |                      |                                                                                                                                                                                                                                                                                                                                                          |                      |
| 6  |                                  |                      |                                                                                                                                                                                                                                                                                                                                                          |                      |
| 7  |                                  |                      |                                                                                                                                                                                                                                                                                                                                                          |                      |
| 8  |                                  |                      |                                                                                                                                                                                                                                                                                                                                                          |                      |
| 9  | Sample size                      | <a href="#">#14</a>  | Estimated number of participants needed to achieve study objectives and how it was determined, including clinical and statistical assumptions supporting any sample size calculations                                                                                                                                                                    | 6                    |
| 10 |                                  |                      |                                                                                                                                                                                                                                                                                                                                                          |                      |
| 11 |                                  |                      |                                                                                                                                                                                                                                                                                                                                                          |                      |
| 12 |                                  |                      |                                                                                                                                                                                                                                                                                                                                                          |                      |
| 13 |                                  |                      |                                                                                                                                                                                                                                                                                                                                                          |                      |
| 14 |                                  |                      |                                                                                                                                                                                                                                                                                                                                                          |                      |
| 15 |                                  |                      |                                                                                                                                                                                                                                                                                                                                                          |                      |
| 16 |                                  |                      |                                                                                                                                                                                                                                                                                                                                                          |                      |
| 17 | Recruitment                      | <a href="#">#15</a>  | Strategies for achieving adequate participant enrolment to reach target sample size                                                                                                                                                                                                                                                                      | 6                    |
| 18 |                                  |                      |                                                                                                                                                                                                                                                                                                                                                          |                      |
| 19 |                                  |                      |                                                                                                                                                                                                                                                                                                                                                          |                      |
| 20 |                                  |                      |                                                                                                                                                                                                                                                                                                                                                          |                      |
| 21 | <b>Methods:</b>                  |                      |                                                                                                                                                                                                                                                                                                                                                          |                      |
| 22 | <b>Assignment of</b>             |                      |                                                                                                                                                                                                                                                                                                                                                          |                      |
| 23 | <b>interventions (for</b>        |                      |                                                                                                                                                                                                                                                                                                                                                          |                      |
| 24 | <b>controlled trials)</b>        |                      |                                                                                                                                                                                                                                                                                                                                                          |                      |
| 25 |                                  |                      |                                                                                                                                                                                                                                                                                                                                                          |                      |
| 26 |                                  |                      |                                                                                                                                                                                                                                                                                                                                                          |                      |
| 27 |                                  |                      |                                                                                                                                                                                                                                                                                                                                                          |                      |
| 28 | Allocation: sequence generation  | <a href="#">#16a</a> | Method of generating the allocation sequence (eg, computer-generated random numbers), and list of any factors for stratification. To reduce predictability of a random sequence, details of any planned restriction (eg, blocking) should be provided in a separate document that is unavailable to those who enrol participants or assign interventions | 6                    |
| 29 |                                  |                      |                                                                                                                                                                                                                                                                                                                                                          |                      |
| 30 |                                  |                      |                                                                                                                                                                                                                                                                                                                                                          |                      |
| 31 |                                  |                      |                                                                                                                                                                                                                                                                                                                                                          |                      |
| 32 |                                  |                      |                                                                                                                                                                                                                                                                                                                                                          |                      |
| 33 |                                  |                      |                                                                                                                                                                                                                                                                                                                                                          |                      |
| 34 |                                  |                      |                                                                                                                                                                                                                                                                                                                                                          |                      |
| 35 |                                  |                      |                                                                                                                                                                                                                                                                                                                                                          |                      |
| 36 |                                  |                      |                                                                                                                                                                                                                                                                                                                                                          |                      |
| 37 |                                  |                      |                                                                                                                                                                                                                                                                                                                                                          |                      |
| 38 |                                  |                      |                                                                                                                                                                                                                                                                                                                                                          |                      |
| 39 |                                  |                      |                                                                                                                                                                                                                                                                                                                                                          |                      |
| 40 |                                  |                      |                                                                                                                                                                                                                                                                                                                                                          |                      |
| 41 | Allocation concealment mechanism | <a href="#">#16b</a> | Mechanism of implementing the allocation sequence (eg, central telephone; sequentially numbered, opaque, sealed envelopes), describing any steps to conceal the sequence until interventions are assigned                                                                                                                                                | 6                    |
| 42 |                                  |                      |                                                                                                                                                                                                                                                                                                                                                          |                      |
| 43 |                                  |                      |                                                                                                                                                                                                                                                                                                                                                          |                      |
| 44 |                                  |                      |                                                                                                                                                                                                                                                                                                                                                          |                      |
| 45 |                                  |                      |                                                                                                                                                                                                                                                                                                                                                          |                      |
| 46 |                                  |                      |                                                                                                                                                                                                                                                                                                                                                          |                      |
| 47 |                                  |                      |                                                                                                                                                                                                                                                                                                                                                          |                      |
| 48 |                                  |                      |                                                                                                                                                                                                                                                                                                                                                          |                      |
| 49 | Allocation: implementation       | <a href="#">#16c</a> | Who will generate the allocation sequence, who will enrol participants, and who will assign participants to interventions                                                                                                                                                                                                                                | N/A not been decided |
| 50 |                                  |                      |                                                                                                                                                                                                                                                                                                                                                          |                      |
| 51 |                                  |                      |                                                                                                                                                                                                                                                                                                                                                          |                      |
| 52 |                                  |                      |                                                                                                                                                                                                                                                                                                                                                          |                      |
| 53 |                                  |                      |                                                                                                                                                                                                                                                                                                                                                          |                      |
| 54 | Blinding (masking)               | <a href="#">#17a</a> | Who will be blinded after assignment to interventions (eg, trial participants, care                                                                                                                                                                                                                                                                      | 6                    |
| 55 |                                  |                      |                                                                                                                                                                                                                                                                                                                                                          |                      |
| 56 |                                  |                      |                                                                                                                                                                                                                                                                                                                                                          |                      |
| 57 |                                  |                      |                                                                                                                                                                                                                                                                                                                                                          |                      |
| 58 |                                  |                      |                                                                                                                                                                                                                                                                                                                                                          |                      |
| 59 |                                  |                      |                                                                                                                                                                                                                                                                                                                                                          |                      |
| 60 |                                  |                      |                                                                                                                                                                                                                                                                                                                                                          |                      |

providers, outcome assessors, data analysts),  
and how

Blinding (masking): [#17b](#) If blinded, circumstances under which unblinding is permissible, and procedure for revealing a participant's allocated intervention during the trial

**Methods: Data collection, management, and analysis**

Data collection plan [#18a](#) Plans for assessment and collection of outcome, baseline, and other trial data, including any related processes to promote data quality (eg, duplicate 6measurements, training of assessors) and a description of study instruments (eg, questionnaires, laboratory tests) along with their reliability and validity, if known. Reference to where data collection forms can be found, if not in the protocol

Data collection plan: retention [#18b](#) Plans to promote participant retention and complete follow-up, including list of any outcome data to be collected for participants who discontinue or deviate from intervention protocols

Data management [#19](#) Plans for data entry, coding, security, and storage, including any related processes to promote data quality (eg, double data entry; range checks for data values). Reference to where details of data management procedures can be found, if not in the protocol

Statistics: outcomes [#20a](#) Statistical methods for analysing primary and secondary outcomes. Reference to where other details of the statistical analysis plan can be found, if not in the protocol

Statistics: additional analyses [#20b](#) Methods for any additional analyses (eg, subgroup and adjusted analyses)



|    |                      |                      |                                                      |       |
|----|----------------------|----------------------|------------------------------------------------------|-------|
| 1  | Statistics: analysis | <a href="#">#20c</a> | Definition of analysis population relating to        | 11    |
| 2  | population and       |                      | protocol non-adherence (eg, as randomised            |       |
| 3  | missing data         |                      | analysis), and any statistical methods to handle     |       |
| 4  |                      |                      | missing data (eg, multiple imputation)               |       |
| 5  |                      |                      |                                                      |       |
| 6  |                      |                      |                                                      |       |
| 7  |                      |                      |                                                      |       |
| 8  | <b>Methods:</b>      |                      |                                                      |       |
| 9  | <b>Monitoring</b>    |                      |                                                      |       |
| 10 |                      |                      |                                                      |       |
| 11 | Data monitoring:     | <a href="#">#21a</a> | Composition of data monitoring committee             | N/A   |
| 12 | formal committee     |                      | (DMC); summary of its role and reporting             |       |
| 13 |                      |                      | structure; statement of whether it is independent    |       |
| 14 |                      |                      | from the sponsor and competing interests; and        |       |
| 15 |                      |                      | reference to where further details about its         |       |
| 16 |                      |                      | charter can be found, if not in the protocol.        |       |
| 17 |                      |                      | Alternatively, an explanation of why a DMC is        |       |
| 18 |                      |                      | not needed                                           |       |
| 19 |                      |                      |                                                      |       |
| 20 | Data monitoring:     | <a href="#">#21b</a> | Description of any interim analyses and stopping     |       |
| 21 | interim analysis     |                      | guidelines, including who will have access to        |       |
| 22 |                      |                      | these interim results and make the final decision    |       |
| 23 |                      |                      | to terminate the trial                               |       |
| 24 |                      |                      |                                                      |       |
| 25 |                      |                      |                                                      |       |
| 26 |                      |                      |                                                      |       |
| 27 |                      |                      |                                                      |       |
| 28 |                      |                      |                                                      |       |
| 29 |                      |                      |                                                      |       |
| 30 |                      |                      |                                                      |       |
| 31 | Harms                | <a href="#">#22</a>  | Plans for collecting, assessing, reporting, and      |       |
| 32 |                      |                      | managing solicited and spontaneously reported        |       |
| 33 |                      |                      | adverse events and other unintended effects of       |       |
| 34 |                      |                      | trial interventions or trial conduct                 |       |
| 35 |                      |                      |                                                      |       |
| 36 |                      |                      |                                                      |       |
| 37 |                      |                      |                                                      |       |
| 38 | Auditing             | <a href="#">#23</a>  | Frequency and procedures for auditing trial          |       |
| 39 |                      |                      | conduct, if any, and whether the process will be     |       |
| 40 |                      |                      | independent from investigators and the sponsor       |       |
| 41 |                      |                      |                                                      |       |
| 42 |                      |                      |                                                      |       |
| 43 | <b>Ethics and</b>    |                      |                                                      |       |
| 44 | <b>dissemination</b> |                      |                                                      |       |
| 45 |                      |                      |                                                      |       |
| 46 |                      |                      |                                                      |       |
| 47 | Research ethics      | <a href="#">#24</a>  | Plans for seeking research ethics committee /        | 12-13 |
| 48 | approval             |                      | institutional review board (REC / IRB) approval      |       |
| 49 |                      |                      |                                                      |       |
| 50 |                      |                      |                                                      |       |
| 51 | Protocol             | <a href="#">#25</a>  | Plans for communicating important protocol           | N/A   |
| 52 | amendments           |                      | modifications (eg, changes to eligibility criteria,  |       |
| 53 |                      |                      | outcomes, analyses) to relevant parties (eg,         |       |
| 54 |                      |                      | investigators, REC / IRBs, trial participants, trial |       |
| 55 |                      |                      | registries, journals, regulators)                    |       |
| 56 |                      |                      |                                                      |       |
| 57 |                      |                      |                                                      |       |
| 58 |                      |                      |                                                      |       |
| 59 |                      |                      |                                                      |       |
| 60 |                      |                      |                                                      |       |

|    |                       |                      |                                                    |       |
|----|-----------------------|----------------------|----------------------------------------------------|-------|
| 1  | Consent or assent     | <a href="#">#26a</a> | Who will obtain informed consent or assent from    | 12    |
| 2  |                       |                      | potential trial participants or authorised         |       |
| 3  |                       |                      | surrogates, and how (see Item 32)                  |       |
| 4  |                       |                      |                                                    |       |
| 5  |                       |                      |                                                    |       |
| 6  | Consent or assent:    | <a href="#">#26b</a> | Additional consent provisions for collection and   | N/A   |
| 7  | ancillary studies     |                      | use of participant data and biological specimens   |       |
| 8  |                       |                      | in ancillary studies, if applicable                |       |
| 9  |                       |                      |                                                    |       |
| 10 |                       |                      |                                                    |       |
| 11 | Confidentiality       | <a href="#">#27</a>  | How personal information about potential and       | 12-13 |
| 12 |                       |                      | enrolled participants will be collected, shared,   |       |
| 13 |                       |                      | and maintained in order to protect confidentiality |       |
| 14 |                       |                      | before, during, and after the trial                |       |
| 15 |                       |                      |                                                    |       |
| 16 |                       |                      |                                                    |       |
| 17 |                       |                      |                                                    |       |
| 18 | Declaration of        | <a href="#">#28</a>  | Financial and other competing interests for        | 13    |
| 19 | interests             |                      | principal investigators for the overall trial and  |       |
| 20 |                       |                      | each study site                                    |       |
| 21 |                       |                      |                                                    |       |
| 22 |                       |                      |                                                    |       |
| 23 |                       |                      |                                                    |       |
| 24 | Data access           | <a href="#">#29</a>  | Statement of who will have access to the final     | 13    |
| 25 |                       |                      | trial dataset, and disclosure of contractual       |       |
| 26 |                       |                      | agreements that limit such access for              |       |
| 27 |                       |                      | investigators                                      |       |
| 28 |                       |                      |                                                    |       |
| 29 |                       |                      |                                                    |       |
| 30 | Ancillary and post    | <a href="#">#30</a>  | Provisions, if any, for ancillary and post-trial   | None  |
| 31 | trial care            |                      | care, and for compensation to those who suffer     |       |
| 32 |                       |                      | harm from trial participation                      |       |
| 33 |                       |                      |                                                    |       |
| 34 |                       |                      |                                                    |       |
| 35 |                       |                      |                                                    |       |
| 36 | Dissemination         | <a href="#">#31a</a> | Plans for investigators and sponsor to             | 13    |
| 37 | policy: trial results |                      | communicate trial results to participants,         |       |
| 38 |                       |                      | healthcare professionals, the public, and other    |       |
| 39 |                       |                      | relevant groups (eg, via publication, reporting in |       |
| 40 |                       |                      | results databases, or other data sharing           |       |
| 41 |                       |                      | arrangements), including any publication           |       |
| 42 |                       |                      | restrictions                                       |       |
| 43 |                       |                      |                                                    |       |
| 44 |                       |                      |                                                    |       |
| 45 |                       |                      |                                                    |       |
| 46 |                       |                      |                                                    |       |
| 47 | Dissemination         | <a href="#">#31b</a> | Authorship eligibility guidelines and any intended | 13    |
| 48 | policy: authorship    |                      | use of professional writers                        |       |
| 49 |                       |                      |                                                    |       |
| 50 |                       |                      |                                                    |       |
| 51 | Dissemination         | <a href="#">#31c</a> | Plans, if any, for granting public access to the   | None  |
| 52 | policy: reproducible  |                      | full protocol, participant-level dataset, and      |       |
| 53 | research              |                      | statistical code                                   |       |
| 54 |                       |                      |                                                    |       |
| 55 |                       |                      |                                                    |       |

## Appendices

|    |                      |                     |                                                  |                   |
|----|----------------------|---------------------|--------------------------------------------------|-------------------|
| 1  | Informed consent     | <a href="#">#32</a> | Model consent form and other related             | N/A the study was |
| 2  | materials            |                     | documentation given to participants and          | granted including |
| 3  |                      |                     | authorised surrogates                            | consent forms, by |
| 4  |                      |                     |                                                  | national review   |
| 5  |                      |                     |                                                  | board             |
| 6  |                      |                     |                                                  |                   |
| 7  |                      |                     |                                                  |                   |
| 8  |                      |                     |                                                  |                   |
| 9  | Biological specimens | <a href="#">#33</a> | Plans for collection, laboratory evaluation, and | N/A               |
| 10 |                      |                     | storage of biological specimens for genetic or   |                   |
| 11 |                      |                     | molecular analysis in the current trial and for  |                   |
| 12 |                      |                     | future use in ancillary studies, if applicable   |                   |
| 13 |                      |                     |                                                  |                   |
| 14 |                      |                     |                                                  |                   |
| 15 |                      |                     |                                                  |                   |

16 None The SPIRIT checklist is distributed under the terms of the Creative Commons Attribution  
17 License CC-BY-ND 3.0. This checklist can be completed online using <https://www.goodreports.org/>, a  
18 tool made by the [EQUATOR Network](#) in collaboration with [Penelope.ai](#)  
19  
20  
21  
22  
23  
24  
25  
26  
27  
28  
29  
30  
31  
32  
33  
34  
35  
36  
37  
38  
39  
40  
41  
42  
43  
44  
45  
46  
47  
48  
49  
50  
51  
52  
53  
54  
55  
56  
57  
58  
59  
60

# BMJ Open

## Primary prevention of stroke: engaging everyday activities promoting health – a randomised controlled pilot trial protocol

|                                 |                                                                                                                                                                                                                                                                                                                                                                                                                                                                                                                                                                                                                                                                                                                                |
|---------------------------------|--------------------------------------------------------------------------------------------------------------------------------------------------------------------------------------------------------------------------------------------------------------------------------------------------------------------------------------------------------------------------------------------------------------------------------------------------------------------------------------------------------------------------------------------------------------------------------------------------------------------------------------------------------------------------------------------------------------------------------|
| Journal:                        | <i>BMJ Open</i>                                                                                                                                                                                                                                                                                                                                                                                                                                                                                                                                                                                                                                                                                                                |
| Manuscript ID                   | bmjopen-2019-031984.R1                                                                                                                                                                                                                                                                                                                                                                                                                                                                                                                                                                                                                                                                                                         |
| Article Type:                   | Protocol                                                                                                                                                                                                                                                                                                                                                                                                                                                                                                                                                                                                                                                                                                                       |
| Date Submitted by the Author:   | 30-Jul-2019                                                                                                                                                                                                                                                                                                                                                                                                                                                                                                                                                                                                                                                                                                                    |
| Complete List of Authors:       | Patomella, Ann-Helen; Karolinska Institute, Department of Neurobiology, Care Sciences and Society<br>Guidetti, Susanne; Karolinska Institutet, Neurobiology, Care Science and Society<br>Mälstam, Emelie; Karolinska Institute, Department of Neurobiology, Care Sciences and Society<br>Eriksson, Christina; Karolinska Institute, Department of Neurobiology, Care Sciences and Society<br>Bergström, Aileen; Karolinska Institutet Department of Neurobiology Care Sciences and Society<br>Åkesson, Elisabet; Karolinska Institute, Department of Neurobiology, Care Sciences and Society<br>Kottorp, Anders; Malmö Universitet<br>Asaba, Eric; Karolinska Institute, Department of Neurobiology, Care Sciences and Society |
| <b>Primary Subject Heading</b>: | Health services research                                                                                                                                                                                                                                                                                                                                                                                                                                                                                                                                                                                                                                                                                                       |
| Secondary Subject Heading:      | Rehabilitation medicine                                                                                                                                                                                                                                                                                                                                                                                                                                                                                                                                                                                                                                                                                                        |
| Keywords:                       | Stroke < NEUROLOGY, Prevention, Mhealth, PRIMARY CARE, stroke risk, occupational therapy                                                                                                                                                                                                                                                                                                                                                                                                                                                                                                                                                                                                                                       |
|                                 |                                                                                                                                                                                                                                                                                                                                                                                                                                                                                                                                                                                                                                                                                                                                |

SCHOLARONE™  
Manuscripts

1  
2  
3  
4 **Primary prevention of stroke: engaging everyday activities promoting health – a**  
5 **randomised controlled pilot trial protocol**  
6  
7  
8

9 Patomella AH (ORCID 0000-0003-2667-4073)<sup>1</sup>, Guidetti S ( ORCID 0000-0001-6878-6394) <sup>1</sup>,  
10 Mälstam E (ORCID 0000-0002-0840-6342)<sup>1, 2</sup>, Eriksson C (ORCID 0000-0002-0546-1151)<sup>1, 3</sup>,  
11 Bergström A (ORCID 0000-0002-7091-7514)<sup>1</sup> , Åkesson E (ORCID 0000-0002-8227-  
12 9118)<sup>5,6</sup>, Kottorp A (ORCID 0000-0002-8976-2612)<sup>4</sup>, and Asaba E (ORCID 0000-0002-6910-  
13 3468)<sup>1</sup> .  
14  
15  
16

17  
18 <sup>1</sup>Department of Neurobiology, Care Sciences and Society, Division of Occupational Therapy,  
19 Karolinska Institutet, Stockholm, Sweden  
20

21 <sup>2</sup>Faculty of Health and Occupational studies, Department of Public health and Sport  
22 sciences, University of Gävle, Sweden  
23

24 <sup>3</sup> Academic Primary Healthcare Centre, Stockholm  
25

26 <sup>4</sup>University of Malmö  
27

28 <sup>5</sup>Department of Neurobiology, Care Sciences and Society, Division of Neurogeriatrics,  
29 Karolinska Institutet, Stockholm, Sweden  
30

31 <sup>6</sup>R&D Unit, Stockholms Sjukhem, Stockholm, Sweden  
32  
33  
34  
35  
36  
37  
38  
39  
40  
41  
42  
43  
44  
45  
46  
47  
48  
49  
50  
51  
52  
53  
54  
55  
56  
57  
58  
59  
60

**Corresponding author:**

Ann-Helen Patomella, Department of Neurobiology, Care Sciences and Society, Division of Occupational Therapy, Karolinska Institutet, Stockholm, Sweden

Email address: ann-helen.patomella@ki.se

Phone number: +46 852483726

\* I, the Submitting Author has the right to grant and does grant on behalf of all authors of the Work (as defined in the below author licence), an exclusive licence and/or a non-exclusive licence for contributions from authors who are: i) UK Crown employees; ii) where BMJ has agreed a CC-BY licence shall apply, and/or iii) in accordance with the terms applicable for US Federal Government officers or employees acting as part of their official duties; on a worldwide, perpetual, irrevocable, royalty-free basis to BMJ Publishing Group Ltd ("BMJ") its licensees and where the relevant Journal is co-owned by BMJ to the co-owners of the Journal, to publish the Work in BMJ Open and any other BMJ products and to exploit all rights, as set out in our licence.

The Submitting Author accepts and understands that any supply made under these terms is made by BMJ to the Submitting Author unless you are acting as an employee on behalf of your employer or a postgraduate student of an affiliated institution which is paying any applicable article publishing charge ("APC") for Open Access articles. Where the Submitting Author wishes to make the Work available on an Open Access basis (and intends to pay the relevant APC), the terms of reuse of such Open Access shall be governed by a Creative Commons licence – details of these licences and which Creative Commons licence will apply to this Work are set out in our licence referred to above.

**Word count:** 4121 (excluding title page, abstract and references).

**Protocol version:** 4<sup>th</sup> of July 2019. Version 2.0

**Trial Registration number:** ClinicalTrials.gov Identifier: NCT03730701

## **Abstract**

### Introduction

Stroke is a globally common disease that has detrimental effects on the individual and, more broadly, on society. Lifestyle change can contribute to reducing risk factors for stroke.

Although there are direct benefits of a healthy lifestyle, sustaining and incorporating healthy activities into everyday life is a challenge. Engaging everyday activities have the potential to support lifestyle change and promote sustainable activity patterns. Current healthcare is failing to reduce modifiable risk factors in people at risk, and in addition to current practice, there is a need for systematic and efficient non-pharmacological and non-surgical stroke prevention strategies. The aim of the pilot study is to increase knowledge about the effects of a prevention programme and its feasibility to promote sustainable and healthy activity patterns among persons at risk for stroke.

### Methods and analysis

The proposed pilot study will be a two-armed randomised, assessor-blinded, parallel pilot trial. The study will include feasibility data, investigating acceptability and delivery of the intervention. Persons at risk of stroke (n=60) will be included in a mobile phone-supported prevention programme. The 10-week programme will be conducted at primary healthcare clinics, combining group meetings and online resources to support self-management of lifestyle change. Main outcomes are stroke risk, lifestyle habits and healthy activity pattern. Assessments will be performed at baseline and at follow-up (immediately following the end of the programme and at 6 and 12 months). Effects of the programme will be analysed using inferential statistics. Feasibility will be analysed using both qualitative and quantitative methods.

### Ethics and dissemination

The study has been approved by the Regional Ethical Review Board in Stockholm, Sweden, being granted Ref. Nos. 2015/834-31, 2016/2203-32 and 2019/01444. Study results will be disseminated through peer-review journals and presentations to mixed audiences at regional and international conferences.

## Article Summary

### Strengths and limitations of this study

- A major strength of the proposed study is the utilisation of engaging everyday activities as a mediator for sustainable lifestyle change.
- The study is designed as a randomised controlled trial and will provide preliminary data on the effects of a prevention programme for persons at risk of stroke.
- Mobile phone technology will be used to support lifestyle change processes among participants.
- The combination of qualitative and quantitative data systematically collected before and after the intervention period will provide rich data, which is useful for analysing the feasibility of the programme and its impact on the health and well-being of persons at risk of stroke.
- A limitation of the study is a relatively small sample size, which can result in insufficient power to determine effects.



## INTRODUCTION

Stroke is the second leading cause of death globally and the disease burden based on disability-adjusted life years (DALYs), which is a measure of years lost due to death, poor health or disability has risen(1). The residual effects of stroke detrimentally impact on quality of life in terms of limiting physical, social, and emotional health both for persons with stroke and their caregivers (2). Subsequently, the economic impact of stroke in Sweden is estimated at 76,000 Euros for the first 2 years after the event, not including indirect costs such as loss of income and family burden (1). The magnitude of the problem can be put into context, considering evidence that suggests that many of the risk factors for stroke and other cardiovascular events are modifiable: tobacco use, excessive alcohol consumption, type 2 diabetes, hypertension, physical inactivity and dietary intake leading to high cholesterol and/or obesity (1, 3). Meaningful and purposeful everyday activities combined with moderate physical activities and a healthy diet has been found to be strongly related to well-being and longevity (4, 5). However, a recent focus-group study with general practitioners in a Swedish primary healthcare context revealed that there was a lack of systematic screening of stroke risk and adherence to risk factor modification was rare (6).

### **Theoretical concept of the prevention program**

The prevention program in this study is a theoretically grounded, complex intervention (7). The programme is based on activities in people's everyday lives and integrates health and well-being with what people do, as well as with what they want or need to do, in order to thrive and live well (8, 9).

In this protocol, the term lifestyle is used to conceptualize and define activity patterns (individual actions and behaviour) in everyday life that may or may not contribute to health. Lifestyle change refers to a conscious change of behaviour and everyday activities in order to promote health. The process of changing behaviour results from an interaction between the person (e.g. self-efficacy), the environment (support and material) and the action (10). In the project, the key behavioural change technique (11), is incorporating engaging everyday activities (EEA) that contribute to a healthy lifestyle. This might include changing the form of current EEAs or finding new health-promoting EEAs.

### *Engaging everyday activity – a game-changer*

Although the benefits of healthy lifestyle are clear (3, 12) the long-term effect and maintenance of healthy lifestyle are not (13-16). The effectiveness of primary healthcare-based physical activity's interventions are inconclusive (17). There is evidence for short-term improvements, but there is a lack of evidence for long-term effects (14). Successfully and

1  
2  
3 sustainably incorporating healthy lifestyle patterns into everyday life is a challenge for many  
4 people. Engaging everyday activities (EEA) are seen as the means and goal for changing  
5 and sustaining a healthy lifestyle. EEAs occur in the interaction between the individual and  
6 the sociocultural setting (18). The concept of EEA refers to an individual perception of  
7 personal activities that are valuable, meaningful and purposeful, as well as providing an  
8 intense sense of participation, EEAs are activities are done regularly and part of a person's  
9 life (19). EEAs can go beyond personal pleasure and can have a higher level of importance  
10 due to meaning for others such as family, friends or society at large. EEAs are the things that  
11 people do that make life worth living and that can contribute to well-being (9, 19, 20). Studies  
12 have shown that promoting EEAs can have positive health impacts for older adults (8, 18, 21,  
13 22). Example of how EEAs can be modified to increase health is for example to change a  
14 sedentary EEA to a more physically demanding activity e.g. a person who engage in listening  
15 to music, to regularly go out to dance or listening to music while taking a walk or run.  
16 However, EEAs can also lead to ill health in cases where the EEA to the sedimentation of  
17 risk factors in everyday life such as sedentary behaviours or an unhealthy diet. Although  
18 EEAs can be a key to incorporating positive change and sustainable healthy lifestyle choices  
19 to reduce the risk for stroke, there is a need to systematically explore this further.  
20  
21  
22  
23  
24  
25  
26  
27  
28  
29  
30

### 31 *Sharing personal experiences as part of a change process*

32  
33 The intervention in the present study espouses the idea that personal experiences should be  
34 the point of departure for a person-centred prevention programme, enabling individual  
35 autonomy in decisions regarding lifestyle change. Sharing experiences, shared activities and  
36 reflections lead to learning about one's own stroke risk, activity patterns and habits. Bryan  
37 and colleagues (23) have used theories to summarise five central principles for adult  
38 learning: a) adults need to know why they are learning; b) adults need to be motivated to  
39 learn by the need to solve problems; c) adults' previous experiences must be respected and  
40 built upon; d) learning approaches should match adults' backgrounds and diversity; e) adults  
41 need to be actively involved in the learning process. The programme will be tailored to match  
42 needs and competences of the individual and build on participants' previous experiences. In  
43 addition to increase literacy with regard to stroke risk and change, there is a need to learn  
44 how to use digital support systems efficiently. Participants in the study will be actively  
45 involved in setting their own goals because this is important in order to manage their health  
46 while following the programme.  
47  
48  
49  
50  
51  
52  
53  
54

### 55 **Objectives of the proposed study**

56  
57  
58 The aim is to gain knowledge concerning the effectiveness of a prevention programme in  
59 promoting sustainable and healthy activity patterns and enabling lifestyle change together  
60

1  
2  
3 with and among people at risk of stroke. The study's aim is also to gain knowledge about the  
4 feasibility and usefulness of a research protocol that includes a mobile phone application  
5 (app).  
6  
7  
8  
9

## 10 **METHODS AND ANALYSIS**

### 11 **Design**

12  
13  
14 The pilot study will be a two-armed randomised, assessor-blinded, parallel pilot trial. The  
15 protocol also includes a feasibility study combining qualitative interviews and descriptive  
16 quantitative data, investigating the acceptability and delivery of the intervention (24).  
17  
18

### 19 **Study setting**

20  
21 The study will be conducted in close collaboration with Primary healthcare clinics (PHC) in  
22 the Stockholm area (different parts of Stockholm in order to reach a diverse population of  
23 healthcare seekers) and in PHCs in both urban and rural areas in the County Council of  
24 Gävleborg.  
25  
26  
27

### 28 **Sample size and power considerations**

29  
30 This study is an explorative pilot and feasibility study; no statistical power analyses have  
31 been calculated. A total sample of 60 participants will be enrolled of which 30 will be  
32 randomized to intervention group. It is estimated that a total of four PHCs will participate and  
33 deliver the intervention, (two from rural and urban Stockholm, two from rural and urban  
34 Gävleborg) each running an intervention group with 8-10 participants. A drop-out rate of 20%  
35 is expected, resulting in a total of n= 26 in the intervention and control groups, respectively.  
36  
37  
38  
39  
40

### 41 **Participant timeline**

42  
43 Participant enrolment will be started in June 2019 and the last qualitative interview is  
44 scheduled for before June 2020. During this period, 60 participants are expected to be  
45 enrolled in the study (30 controls and 30 in the intervention group).  
46  
47  
48

### 49 **Participants: Eligibility criteria**

50  
51 Persons at risk of stroke will be included in the project and recruitment will be by means of  
52 advertisements in local newspapers, webpage and at PHCs. A stroke risk screening survey  
53 (potential participants are either self-screened online or screened by a professional at their  
54 PHC) will be used to find eligible participants. A total sample of n=60 participants (persons at  
55 risk of stroke), divided into two arms (30+30) intervention and controls is estimated. Block  
56 randomisation will be utilised with a block size of four (2 control=A and 2 intervention=B, with  
57  
58  
59  
60

1  
2  
3 blocks of 4 having random block orders: AABB, ABAB, ABBA, BABA, BAAB, and BBAA) to  
4 allocate patients to either the intervention or the control group (25). Inclusion criteria are that  
5 the participants a) have a high risk for stroke according to the Stroke Risk Score card (26), b)  
6 are motivated for lifestyle change (asked about their motivation to take part in a lifestyle  
7 program) c) motivated for participating in a digital lifestyle prevention (including user of a  
8 smart phone or tablet), d) are between 45-70 years old and without a diagnosis of dementia  
9 or cognitive impairment hindering participation. Exclusion criteria are having previously had a  
10 Stroke or TIA diagnosis and lack of understanding the Swedish language.  
11  
12  
13  
14  
15

16 The researchers will encourage and guide any participant who experiences health-related  
17 problems during the programme to get in contact with his or her general practitioner, GP.  
18 Participants may choose to interrupt their participation in the study at any time. The  
19 researcher can also discontinue a participant's participation based on health issues or  
20 reasons that might jeopardize that person's safety. Reasons for interruption will be recorded.  
21  
22  
23  
24

### 25 **Active Lifestyle – a stroke-prevention programme**

26 The prevention programme is based on earlier research evidence and theoretical  
27 underpinnings as presented, and on preliminary studies conducted by the research group  
28 (6). The inter-professional research group together with health professionals and technicians  
29 had a total of four workshops during 2015-2017 with the aim of modelling the components  
30 and themes of the programme. A logic model (27) was created in order to plan and organise  
31 the intervention. The logic model was used to visualise possible conflicts, barriers,  
32 contradictions, needed resources, activities, outputs and impacts of the research process.  
33  
34  
35  
36  
37

38 The Active Lifestyle prevention programme enables healthy activity patterns and aims to  
39 reduce the risk of stroke by means of four strategies: a) the incorporation of health-promoting  
40 EEAs, b) the use of mobile phone technology to increase health literacy and awareness of  
41 current habits and to foster self-management c) forming new habits that prompt conscious  
42 decisions to make healthy choices, and d) setting realistic goals and sharing experience in a  
43 learning environment.  
44  
45  
46  
47

### 48 *Duration and specific content of the intervention programme*

49 The Active Lifestyle stroke-prevention programme is a 10-week programme. The intervention  
50 will include 5 sessions over 5 weeks with a booster session 5 weeks later. The programme  
51 starts with an individual meeting (baseline) and with a follow-up meeting one week after the  
52 last group session. The participants in the intervention group will set three self-chosen goals  
53 for lifestyle change formulated as daily goals based on an interview done at baseline using  
54 the Canadian Occupational Performance Measure (28). During the intervention, participants  
55  
56  
57  
58  
59  
60

will work actively with both EEAs and habits in order to change behaviour and lifestyle. For example, a person may have reading as an EEA, an activity that is relatively neutral on a continuum of health-promotion. The activity might be experienced as engaging and meaningful, and contribute to psychological wellbeing, but a redesign of the activity could be walking or exercising at the gym while listening to an audio book, leading to health benefits which could be accepted and incorporated into the individual's activity patterns. During the programme, the participants will become aware of their current lifestyle habits as well as new habits that are formed by the participants themselves. New habits may be cued by situations (such as seeing an escalator) prompting a health-promoting behaviour and making a conscious decision (e.g. to take the stairs) (29). The program is expected to foster self-management skills and the continuation a change process following the program period.

Each module has a theme and relevant activities. Group dynamics are used to reflect on experiences, doing and future goals. The modules, presented in table 1, are delivered by an interventionist/researcher together with a trained health professional (training during two half-days), for example an occupational therapist, physiotherapist or dietician. To avoid contamination, the health professionals are instructed to not deliver the program to other patients during the research period. The program is new to the PHCs and has not been delivered before.

Table 1: Summary of module themes, concepts and activities supporting a change process

| Module theme                                        | Concepts                                                                                  | Activity                                                                                                  |
|-----------------------------------------------------|-------------------------------------------------------------------------------------------|-----------------------------------------------------------------------------------------------------------|
| 1: Risk factors for stroke and engaging activities  | Health literacy concerning stroke risk, engaging activities, change process, expectations | Peer interview on engaging activities. Learn how to register in the app. Set three lifestyle change goals |
| 2: Physical activity                                | Physical activity, physical inactivity                                                    | Try a physical group exercise class at a gym                                                              |
| 3: Diet and health                                  | Dietary routines and change                                                               | Prepare and test a healthy sandwich                                                                       |
| 4: Balanced everyday life                           | Activity balance, stress                                                                  | Relaxation, for example medical yoga                                                                      |
| 5: Sustained health: routines and activity patterns | Current and desired routines and activity patterns, revisiting goals                      | Walking session                                                                                           |

|                                                                                                     |                                                   |                                                            |
|-----------------------------------------------------------------------------------------------------|---------------------------------------------------|------------------------------------------------------------|
| Booster session: “Future horizon”, identity, self-management of health and social aspects of health | Self-management, view of the self, social support | Preparing healthy snacks and walking and talking in a park |
|-----------------------------------------------------------------------------------------------------|---------------------------------------------------|------------------------------------------------------------|

### *The mobile phone app*

The app for the project was developed in close collaboration with ScientificMed Tech AB (<http://www.scientificmed.com>). ScientificMed Tech has a solid track record with publications on similar platforms (30, 31). The digital platform includes several unique aspects in the data input logic, which contributes to immediate feedback on progress as well as tracking of personally tailored goals related to stroke risk in the context of everyday life. The app includes six domains for registering daily activities, experiences and behaviours: Goal achievements (questions on how well the person has achieved the three pre-set goals and self-efficacy), Physical activity (registering step counts, registering 24 hr time use in relation to exercise, moderate intense activities, sleep, sedentary activities and other activities), Engaging everyday activities (participating in EEAs and self-efficacy), Tobacco and alcohol use (registering consumption), Stress levels (questions about perceived time-pressure) and Dietary habits (registering consumption of fruits/vegetables, breakfast, fish and snacks). Registrations result in graphs and plots that inform the participant of current behaviours and which serve as feedback on habits. The six domains are based on modifiable risk factors for stroke as presented by the American Heart Association (3) with the addition of promoting EEAs and reducing stress. The purpose of the app is to support the participant’s change process via registration, feedback and self-management of habits and behaviours that impact on health and risk of stroke. Novice technology users will have extra training in the use of the technology and the app.

The control group will be offered standard care by the PHCs. During baseline assessment, all participants will be informed of their stroke risk factors and given a leaflet with advice on how to manage modifiable risk factors.

### **Data collection**

All of the instruments measuring primary and secondary outcomes will be collected at baseline, at follow-up and at 6 and 12 months. Demographic data will be collected at baseline. All qualitative interviews will be semi-structured and an interview guide will be used. Interviews will be digitally recorded.

### *Background and demographic data*

1  
2  
3 Background data will include: weight, height (in order to calculate Body Mass Index) and  
4 blood pressure. Survey data will be gathered for health literacy of stroke risk (32),  
5 experiences of time pressure (stress), readiness and motivation for change (33), current  
6 mobile phone use and mapping out engaging everyday activities.  
7  
8

#### 9 *Feasibility data*

10  
11 A combination of qualitative and quantitative data will be collected among the interventionists  
12 and the participants using surveys, log books and qualitative interviews. In order to  
13 investigate acceptability of the programme, there will be analysis of patient recruitment, data  
14 collection, assessment tools, digital platforms and procedures. Items from the System  
15 Usability Scale (34) will be used to investigate ease of use of the Active Lifestyle app. In  
16 addition, usage-tracking tools and usage analytics will be used to obtain indicators of the  
17 feasibility and acceptability of the app. Data will include participants' daily self-reports and  
18 check-ins for ratings (e.g. goal-achievements, daily activities and dietary habits). Semi-  
19 structured qualitative exit interviews will be conducted by a researcher not involved in  
20 developing and delivering the intervention programme in order to investigate the acceptability  
21 of the programme. Participants (persons at risk of stroke) and healthcare professionals  
22 delivering the programme will be invited to participate in individual and focus-group exit  
23 interviews.  
24  
25  
26  
27  
28  
29  
30  
31  
32  
33

#### 34 *Outcome data*

35 The primary outcome measures will be stroke risk, lifestyle habits and healthy activity  
36 patterns. Stroke risk is measured using the Stroke Risk Score card (26). The Stroke risk  
37 score card was developed as an easy to use self-assessment tool by the National Stroke  
38 Association in United Kingdom. The tool has been used in a few studies to detect risk factors  
39 for stroke (35, 36). The Stroke Risk Scorecard was chosen over other stroke risk screening  
40 tools as it includes modifiable risk factors for stroke and is easy to score for participants, also  
41 for those that have limited English language skills as the questions and answers are easy to  
42 understand. Lifestyle habits will be measured using a lifestyle habits survey. The Swedish  
43 Lifestyle habits survey is based on guidelines for prevention by the National Board of Health  
44 and Welfare in Sweden (37), with the aim of registering and treating unhealthy lifestyle habits  
45 in primary healthcare. The survey includes questions in four domains: physical activity,  
46 alcohol consumption, tobacco use and dietary intake. Healthy activity patterns are measured  
47 using the Pleasure, Productivity and Restoration profile (38, 39) extended with a health  
48 domain and will map out the participants' everyday activity repertoire.  
49  
50  
51  
52  
53  
54  
55  
56  
57  
58

#### 59 *Secondary outcomes*

1  
2  
3 Secondary outcomes will measure life satisfaction, quality of life, activity balance and activity  
4 performance and satisfaction. LiSat-11 measures life satisfaction (40). EQ-5D will be used to  
5 measure quality of life (41). The participants' level of occupational balance will be measured  
6 with the Occupational Balance Questionnaire (OBQ), giving insight into yet another  
7 perspective of the implications of how activities of everyday life can impact health (42). The  
8 Canadian Occupational Performance Measure (COPM) measures subjective performance  
9 and satisfaction with individually chosen activities (28). COPM will be used to measure EEAs  
10 that the participants find difficult to perform and will guide the formulation of lifestyle change  
11 goals. The COPM scores importance, performance and satisfaction in chosen activities and  
12 upholds psychometric properties of validity and reliability (43, 44). The 6 Minute Walk Test  
13 will be used to measure physical function (45).  
14  
15  
16  
17  
18  
19  
20  
21  
22

## 23 **Data Analysis Plan**

### 24 *Feasibility of the intervention*

25 Data collected from surveys, log books on recruitment and dropout, and logs from the app  
26 registrations will be entered, analysed and summarised. To promote data quality range  
27 checks for data values will be conducted. Descriptive statistical analyses will be conducted in  
28 order to report on feasibility of the study: recruitment, drop-outs, retention rate and  
29 adherence. Data from app registrations will be used to report on how the participants use the  
30 app, and on trends and goal achievements. Other app-related information of interest is the  
31 need for technical assistance. The investigators will assess patterns of app use over time.  
32 Conditions and events facilitating and/or hindering the delivery of the sessions and potential  
33 complications will be registered by the researchers and interventionists and presented.  
34 Qualitative interviews will be transcribed verbatim. All identifying factors will be removed (i.e.  
35 names) during transcription. Copies of the digital recordings will be destroyed after  
36 transcription is completed. Interview transcriptions will be stored in the university's database.  
37 Qualitative materials will be analysed using thematic qualitative analyses (46).  
38  
39  
40  
41  
42  
43  
44  
45  
46

### 47 *Evaluation of outcomes*

48  
49 The preliminary treatment effects will be analysed on an intention-to-treat basis, with  
50 randomised participants retaining their original allocated group, and measured as differences  
51 between groups at follow-up and at 12 months. The study data will be examined for outliers,  
52 normality and missing data. Analyses of covariance will be used for continuous outcomes  
53 with baseline values as covariates. Logistic regression analyses will be used for dichotomous  
54 outcomes. The level of significance will be set at  $p \leq 0.05$  and the confidence level at 95%.  
55 We will use the SPSS (Version 22.0) to analyse the data. These analyses will provide  
56  
57  
58  
59  
60



1  
2  
3 preliminary results for the relative effectiveness of the intervention programme and will inform  
4 subsequent randomised controlled trials.  
5  
6  
7

### 8 **Patient and Public Involvement**

9  
10 A previous case study including six persons following transient ischemic attack (TIA) and at  
11 risk of stroke was conducted in order to test the intervention model and to identify the needs  
12 and experiences of the participants. The content of the current intervention is based on the  
13 feasibility of the intervention given to the TIA group and adjusted in relation to the  
14 participants' experiences, needs and preferences. For example in the TIA study, the  
15 preliminary results suggests that the participants highly valued the group meetings. Physical  
16 activities such as walking in the nature and dancing were experienced as EEA. Experiences  
17 of the participants in the proposed pilot study of managing the app (e.g. challenges,  
18 suggested changes, layout, and period of utilisation) and their experiences of the research  
19 protocol and procedures will be used to inform and redesign any future version of the app  
20 and the study protocol (before a full scale RCT). The qualitative data from the interviews will  
21 report the participants' experiences of taking part in the programme.  
22  
23  
24  
25  
26  
27  
28  
29

### 30 **Discussion**

31  
32 The theoretical base of the protocol is strong and based on EEA's as the mediator and goal  
33 for decreasing the risk of stroke and living a healthy life. Mobile phone technology is enabling  
34 the change process by offering individual feedback and an increasing awareness of current  
35 lifestyle and registration of new habits. This pilot study will provide preliminary data on the  
36 effects and feasibility of the Active Lifestyle prevention programme and its measures and  
37 procedures. Rich data on the impact and experiences of the programme will be provided  
38 from semi-structured interviews, log books, app registrations, outcome measures and  
39 surveys. The strength of the study lies in the robustness of the RCT design. The small  
40 sample size will limit the study's ability to determine effects of the protocol, however the main  
41 aim of the pilot study is not just to determine effects, but also to investigate procedures and  
42 feasibility, and so the sample size is considered to be sufficient in order to test the protocol in  
43 the primary healthcare setting. A potential limitation is the risk for too small samples that  
44 does not provide sufficient diversity of the study population in relation to age, sex, rurality and  
45 socio-economic status (SES), therefore we have chosen to include PHCs from different  
46 areas (rural and urban and from different SES diverse areas) and to set the time for the  
47 group meetings to late in the afternoon to also facilitate participation from persons that work  
48 fulltime.  
49  
50  
51  
52  
53  
54  
55  
56  
57  
58  
59  
60

### **ETHICS AND DISSEMINATION**

1  
2  
3 The project invites and includes people at risk of stroke who, in different ways, may be faced  
4 with vulnerable situations due to their health and lifestyle. This invitation may be perceived as  
5 both an unwanted reminder of potential health complications such as stroke, while at the  
6 same time offering participation in developing a preventive programme with the aim of  
7 reducing the risk. The strength is that study participation is offered to the individual, who may  
8 or may not choose to respond. The potential participant will be informed both verbally and in  
9 writing and given a chance to ask questions before the researcher asks for written informed  
10 consent. An approval from the Regional Ethical Review Board in Stockholm, Sweden has  
11 been granted (Ref. Nos. 2015/834-31, 2016/2203-32 and 2019/01444). In accordance with  
12 the general data protection regulation, GDPR, the participants will be informed of their right  
13 to withdraw at any time and of how their data will be managed. All data will be stored  
14 securely and all participant information will be stored and locked with limited access. All  
15 records will be identified by a coded number. The code number will be stored separately. All  
16 local databases will be password-protected. To ensure confidentiality, data shared to project  
17 team members will be blinded of any identifying participant information. Study participation is  
18 not expected to lead to risks or complications, although stroke risk factors will be monitored  
19 and possible health consequences will be transferred to the regional primary healthcare, it is  
20 expected to support the participating person's health self-management. The findings will be  
21 published in peer-reviewed journals. The results will also be presented to participants, staff  
22 and decision-makers involved in the study, other healthcare professionals and the general  
23 public through national and international conferences.

### 37 38 **AUTHOR CONTRIBUTIONS**

39 AHP, EA and SG conceived the original idea and outline of the study. EM is implementing  
40 the protocol in primary healthcare settings, with oversight and review by AHP, EA and SG.  
41 AK, AB, CE and EÅ contributed to the design of the study. AHP wrote the study protocol  
42 together with EA, SG and AB. All authors discussed and commented on draft versions and  
43 approved the final version. The group would also like to acknowledge Professor Kerstin  
44 Tham, Malmö University for initiating the project and for developing the conceptual ideas of  
45 EEA in stroke prevention.

### 51 52 **FUNDING STATEMENT**

53 This work was funded by grants from Vårdal Foundation, grant nr 2014-0108 and from the  
54 research school of Health Care Science, Karolinska Institutet. This funding source had no  
55 role in the design of this study and will not have any role during its execution, analyses,  
56 interpretation of the data, or decision to submit results.

1  
2  
3  
4  
5  
6  
7  
8  
9  
10  
11  
12  
13  
14  
15  
16  
17  
18  
19  
20  
21  
22  
23  
24  
25  
26  
27  
28  
29  
30  
31  
32  
33  
34  
35  
36  
37  
38  
39  
40  
41  
42  
43  
44  
45  
46  
47  
48  
49  
50  
51  
52  
53  
54  
55  
56  
57  
58  
59  
60

**COMPETING INTERESTS**

The authors declare that they have no competing interests.

For peer review only

## REFERENCES

1. Habner J. Preventing stroke: Uneven progress. A global policy research programme. 2017.
2. Bergstrom AL, Eriksson G, von Koch L, Tham K. Combined life satisfaction of persons with stroke and their caregivers: associations with caregiver burden and the impact of stroke. *Health and quality of life outcomes*. 2011;9:1.
3. Goldstein LB, Bushnell CD, Adams RJ, Appel LJ, Braun LT, Chaturvedi S, et al. Guidelines for the primary prevention of stroke: a guideline for healthcare professionals from the American Heart Association/American Stroke Association. *Stroke*. 2011;42(2):517-84.
4. Poulain M, Herm A, Pes G. The Blue Zones: areas of exceptional longevity around the world. *Vienna Yearbook of Population Research*. 2013;11(1):87.
5. Steptoe A, Deaton A, Stone AA. Psychological wellbeing, health and ageing. *Lancet (London, England)*. 2015;385(9968):640.
6. Patomella A-H, Mickols G, Asaba E, Nilsson G, Fridén C, Kottorp A, et al. General practitioners' reasoning on risk screening and primary prevention of stroke – a focus group study. *BMC family practice*. 2018;19(1):190.
7. Craig P, Dieppe P, Macintyre S, Michie S, Nazareth I, Petticrew M, et al. Developing and evaluating complex interventions: the new Medical Research Council guidance. *BMJ*. 2008;337:a1655.
8. Clark F, Azen SP, Zemke R, Jackson J, Carlson M, Mandel D, et al. Occupational therapy for independent-living older adults: A randomized controlled trial. *Jama*. 1997;278(16):1321-6.
9. Asaba E, Patomella A-H, Guidetti S, Kottorp A, Tham K. Att främja hälsa och förebygga ohälsa genom engagerande aktiviteter: Ett exempel från prevention av stroke. In: Kroksmark U, editor. *Hälsa och Aktivitet i Vardagen - ur ett arbetsterapeutiskt perspektiv*. Nacka: Sveriges Arbetsterapeuter; 2018.
10. Bandura A. Self-efficacy: toward a unifying theory of behavioral change. *Psychol Rev*. 1977;84(2):191-215.
11. Michie S, Johnston M. Theories and techniques of behaviour change: Developing a cumulative science of behaviour change. *Health Psychology Review*. 2012;6(1):1-6.
12. Chiuve SE, Rexrode KM, Spiegelman D, Logroscino G, Manson JE, Rimm EB. Primary prevention of stroke by healthy lifestyle. *Circulation*. 2008;118(9):947.
13. Taylor AH, Cable NT, Faulkner G, Hillsdon M, Narici M, Van Der Bij AK. Physical activity and older adults: a review of health benefits and the effectiveness of interventions. *Journal of Sports Sciences*. 2004;22(8):703-25.
14. Eakin EG, Glasgow RE, Riley KM. Review of primary care-based physical activity intervention studies. *Journal of Family Practice*. 2000;49(2):158-.
15. Müller-Riemenschneider F, Reinhold T, Nocon M, Willich SN. Long-term effectiveness of interventions promoting physical activity: a systematic review. *Preventive medicine*. 2008;47(4):354-68.
16. Weiss EC, Galuska DA, Khan LK, Gillespie C, Serdula MK. Weight regain in US adults who experienced substantial weight loss, 1999–2002. *American journal of preventive medicine*. 2007;33(1):34-40.
17. Hillsdon M, Thorogood M, White I, Foster C. Advising people to take more exercise is ineffective: a randomized controlled trial of physical activity promotion in primary care. *International journal of epidemiology*. 2002;31(4):808-15.
18. Jackson J, Carlson M, Mandel D, Zemke R, Clark F. Occupation in lifestyle redesign: The well elderly study occupational therapy program. *The American Journal of Occupational Therapy*. 1998;52(5):326-36.
19. Jonsson H. A new direction in the conceptualization and categorization of occupation. *Journal of Occupational Science*. 2008;15(1):3-8.

- 1
  - 2
  - 3
  - 4
  - 5
  - 6
  - 7
  - 8
  - 9
  - 10
  - 11
  - 12
  - 13
  - 14
  - 15
  - 16
  - 17
  - 18
  - 19
  - 20
  - 21
  - 22
  - 23
  - 24
  - 25
  - 26
  - 27
  - 28
  - 29
  - 30
  - 31
  - 32
  - 33
  - 34
  - 35
  - 36
  - 37
  - 38
  - 39
  - 40
  - 41
  - 42
  - 43
  - 44
  - 45
  - 46
  - 47
  - 48
  - 49
  - 50
  - 51
  - 52
  - 53
  - 54
  - 55
  - 56
  - 57
  - 58
  - 59
  - 60
20. Asaba E, Bergstrom A, Patomella A-H, Guidetti S. Engaging occupations among persons at risk for stroke: A health paradox. Submitted.
21. Clark F, Jackson J, Carlson M, Chou C-P, Cherry BJ, Jordan-Marsh M, et al. Effectiveness of a lifestyle intervention in promoting the well-being of independently living older people: results of the Well Elderly 2 Randomised Controlled Trial. *Journal of epidemiology and community health*. 2012;66(9):782-90.
22. Mountain G, Windle G, Hind D, Walters S, Keertharuth A, Chatters R, et al. A preventative lifestyle intervention for older adults (lifestyle matters): a randomised controlled trial. *Age and ageing*. 2017;46(4):627-34.
23. Bryan RL, Kreuter MW, Brownson RC. Integrating adult learning principles into training for public health practice. *Health promotion practice*. 2009;10(4):557-63.
24. O’Cathain A, Hoddinott P, Lewin S, Thomas KJ, Young B, Adamson J, et al. Maximising the impact of qualitative research in feasibility studies for randomised controlled trials: guidance for researchers. *Pilot and feasibility studies*. 2015;1(1):32.
25. Sedgwick P. Block randomisation. *BMJ*. 2011;343:d7139.
26. Association NS. Stroke Risk Score Card 2018 [Available from: <https://www.stroke.org/stroke-risk-scorecard-2018/>].
27. Foundation WK. WK Kellogg Foundation logic model development guide: WK Kellogg Foundation; 2004.
28. Law M, Baptiste S, McColl M, Opzoomer A, Polatajko H, Pollock N. The Canadian occupational performance measure: an outcome measure for occupational therapy. *Canadian Journal of Occupational Therapy*. 1990;57(2):82-7.
29. Gardner B. A review and analysis of the use of ‘habit’ in understanding, predicting and influencing health-related behaviour. *Health Psychology Review*. 2015;9(3):277-95.
30. Nyström CD, Sandin S, Henriksson P, Henriksson H, Trolle-Lagerros Y, Larsson C, et al. Mobile-based intervention intended to stop obesity in preschool-aged children: the MINISTOP randomized controlled trial. *The American Journal of Clinical Nutrition*. 2017:1-7.
31. Johnston N, Bodegard J, Jerström S, Åkesson J, Brorsson H, Alfredsson J, et al. Effects of interactive patient smartphone support app on drug adherence and lifestyle changes in myocardial infarction patients: A randomized study. *American Heart Journal*. 2016;178:85-94.
32. Dearborn JL, McCullough LD. Perception of risk and knowledge of risk factors in women at high risk for stroke. *Stroke*. 2009;40(4):1181-6.
33. Prochaska JO, Redding CA, Evers KE. The transtheoretical model and stages of change. *Health behavior: Theory, research, and practice*. 2015:125-48.
34. Brooke J. SUS-A quick and dirty usability scale. *Usability evaluation in industry*. 1996;189(194):4-7.
35. Aycock DM, Kirkendoll KD, Coleman KC, Clark PC, Albright KC, Alexandrov AW. Family history of stroke among African Americans and its association with risk factors, knowledge, perceptions, and exercise. *The Journal of cardiovascular nursing*. 2015;30(2):E1.
36. Anderson J, Godwin KM, Petersen NJ, Willson P, Kent TA. A pilot test of videoconferencing to improve access to a stroke risk-reduction programme for Veterans. *Journal of telemedicine and telecare*. 2013;19(3):153-9.
37. Socialstyrelsen. Nationella riktlinjer för prevention och behandling vid ohälsosamma levnadsvanor. 2018.
38. Adler KE. User-perceived utility of the Daily Experiences of Pleasure, Productivity, and Restoration Profile. *Can J Occup Ther*. 2015;82(4):235-44.
39. Adler KE, Barney L, Moravec A, Sample PL, Fruhauf CA. The Daily Experiences of Pleasure, Productivity, and Restoration Profile: A case study: Etude de cas sur l'utilite du Daily Experiences of Pleasure, Productivity, and Restoration Profile. *Can J Occup Ther*. 2017;84(4-5):262-72.

- 1  
2  
3 40. Fugl-Meyer AR, Melin R, Fugl-Meyer KS. Life satisfaction in 18-to 64-year-old Swedes:  
4 in relation to gender, age, partner and immigrant status. *Journal of rehabilitation medicine*.  
5 2002;34(5):239-46.  
6 41. Burström K, Johannesson M, Diderichsen F. Swedish population health-related quality  
7 of life results using the EQ-5D. *Quality of life research*. 2001;10(7):621-35.  
8 42. Wagman P, Håkansson C. Introducing the occupational balance questionnaire (OBQ).  
9 *Scandinavian journal of occupational therapy*. 2014;21(3):227-31.  
10 43. Dedding C, Cardol M, Eyssen ICJM, Beelen A. Validity of the Canadian Occupational  
11 Performance Measure: a client-centred outcome measurement. *Clinical Rehabilitation*.  
12 2004;18(6):660-7.  
13 44. Cup EH, op Reimer WS, Thijssen MC, van Kuyk-Minis M. Reliability and validity of the  
14 Canadian Occupational Performance Measure in stroke patients. *Clinical rehabilitation*.  
15 2003;17(4):402.  
16 45. Enright PL, Sherrill DL. Reference equations for the six-minute walk in healthy adults.  
17 *American journal of respiratory and critical care medicine*. 1998;158(5):1384-7.  
18 46. Charmaz K. *Constructing grounded theory: A practical guide through qualitative*  
19 *analysis*: Sage; 2006.  
20  
21  
22  
23  
24  
25  
26  
27  
28  
29  
30  
31  
32  
33  
34  
35  
36  
37  
38  
39  
40  
41  
42  
43  
44  
45  
46  
47  
48  
49  
50  
51  
52  
53  
54  
55  
56  
57  
58  
59  
60

# Reporting checklist for protocol of a clinical trial.

Based on the SPIRIT guidelines.

## Instructions to authors

Complete this checklist by entering the page numbers from your manuscript where readers will find each of the items listed below.

Your article may not currently address all the items on the checklist. Please modify your text to include the missing information. If you are certain that an item does not apply, please write "n/a" and provide a short explanation.

Upload your completed checklist as an extra file when you submit to a journal.

In your methods section, say that you used the SPIRIT reporting guidelines, and cite them as:

Chan A-W, Tetzlaff JM, Altman DG, Laupacis A, Gøtzsche PC, Krleža-Jerić K, Hróbjartsson A, Mann H, Dickersin K, Berlin J, Doré C, Parulekar W, Summerskill W, Groves T, Schulz K, Sox H, Rockhold FW, Rennie D, Moher D. SPIRIT 2013 Statement: Defining standard protocol items for clinical trials. *Ann Intern Med.* 2013;158(3):200-207

|                                   |                     | Reporting Item                                                                                               | Page Number                          |
|-----------------------------------|---------------------|--------------------------------------------------------------------------------------------------------------|--------------------------------------|
| <b>Administrative information</b> |                     |                                                                                                              |                                      |
| Title                             | <a href="#">#1</a>  | Descriptive title identifying the study design, population, interventions, and, if applicable, trial acronym | 1                                    |
| Trial registration                | <a href="#">#2a</a> | Trial identifier and registry name. If not yet registered, name of intended registry                         | 2                                    |
| Trial registration: data set      | <a href="#">#2b</a> | All items from the World Health Organization Trial Registration Data Set                                     | N/A a registration has not been done |
| Protocol version                  | <a href="#">#3</a>  | Date and version identifier                                                                                  | 2                                    |
| Funding                           | <a href="#">#4</a>  | Sources and types of financial, material, and other support                                                  | 13                                   |

|    |                      |                     |                                                     |               |
|----|----------------------|---------------------|-----------------------------------------------------|---------------|
| 1  | Roles and            | <a href="#">#5a</a> | Names, affiliations, and roles of protocol          | 13            |
| 2  | responsibilities:    |                     | contributors                                        |               |
| 3  | contributorship      |                     |                                                     |               |
| 4  |                      |                     |                                                     |               |
| 5  |                      |                     |                                                     |               |
| 6  | Roles and            | <a href="#">#5b</a> | Name and contact information for the trial          | N/A, no trial |
| 7  | responsibilities:    |                     | sponsor                                             | sponsor       |
| 8  | sponsor contact      |                     |                                                     |               |
| 9  | information          |                     |                                                     |               |
| 10 |                      |                     |                                                     |               |
| 11 |                      |                     |                                                     |               |
| 12 |                      |                     |                                                     |               |
| 13 | Roles and            | <a href="#">#5c</a> | Role of study sponsor and funders, if any, in       | N/A           |
| 14 | responsibilities:    |                     | study design; collection, management, analysis,     |               |
| 15 | sponsor and funder   |                     | and interpretation of data; writing of the report;  |               |
| 16 |                      |                     | and the decision to submit the report for           |               |
| 17 |                      |                     | publication, including whether they will have       |               |
| 18 |                      |                     | ultimate authority over any of these activities     |               |
| 19 |                      |                     |                                                     |               |
| 20 |                      |                     |                                                     |               |
| 21 |                      |                     |                                                     |               |
| 22 |                      |                     |                                                     |               |
| 23 | Roles and            | <a href="#">#5d</a> | Composition, roles, and responsibilities of the     | N/A           |
| 24 | responsibilities:    |                     | coordinating centre, steering committee,            |               |
| 25 | committees           |                     | endpoint adjudication committee, data               |               |
| 26 |                      |                     | management team, and other individuals or           |               |
| 27 |                      |                     | groups overseeing the trial, if applicable (see     |               |
| 28 |                      |                     | Item 21a for data monitoring committee)             |               |
| 29 |                      |                     |                                                     |               |
| 30 |                      |                     |                                                     |               |
| 31 |                      |                     |                                                     |               |
| 32 |                      |                     |                                                     |               |
| 33 | <b>Introduction</b>  |                     |                                                     |               |
| 34 |                      |                     |                                                     |               |
| 35 | Background and       | <a href="#">#6a</a> | Description of research question and justification  | 4-5           |
| 36 | rationale            |                     | for undertaking the trial, including summary of     |               |
| 37 |                      |                     | relevant studies (published and unpublished)        |               |
| 38 |                      |                     | examining benefits and harms for each               |               |
| 39 |                      |                     | intervention                                        |               |
| 40 |                      |                     |                                                     |               |
| 41 |                      |                     |                                                     |               |
| 42 |                      |                     |                                                     |               |
| 43 | Background and       | <a href="#">#6b</a> | Explanation for choice of comparators               | 9             |
| 44 | rationale: choice of |                     |                                                     |               |
| 45 | comparators          |                     |                                                     |               |
| 46 |                      |                     |                                                     |               |
| 47 |                      |                     |                                                     |               |
| 48 | Objectives           | <a href="#">#7</a>  | Specific objectives or hypotheses                   | 5             |
| 49 |                      |                     |                                                     |               |
| 50 |                      |                     |                                                     |               |
| 51 | Trial design         | <a href="#">#8</a>  | Description of trial design including type of trial |               |
| 52 |                      |                     | (eg, parallel group, crossover, factorial, single   |               |
| 53 |                      |                     | group), allocation ratio, and framework (eg,        |               |
| 54 |                      |                     | superiority, equivalence, non-inferiority,          |               |
| 55 |                      |                     | exploratory)                                        |               |
| 56 |                      |                     |                                                     |               |
| 57 |                      |                     |                                                     |               |
| 58 |                      |                     |                                                     |               |
| 59 |                      |                     |                                                     |               |
| 60 |                      |                     |                                                     |               |



**Methods:****Participants,  
interventions, and  
outcomes**

|                                 |                      |                                                                                                                                                                                                                                                                                                                                                                                |     |
|---------------------------------|----------------------|--------------------------------------------------------------------------------------------------------------------------------------------------------------------------------------------------------------------------------------------------------------------------------------------------------------------------------------------------------------------------------|-----|
| Study setting                   | <a href="#">#9</a>   | Description of study settings (eg, community clinic, academic hospital) and list of countries where data will be collected. Reference to where list of study sites can be obtained                                                                                                                                                                                             | 6   |
| Eligibility criteria            | <a href="#">#10</a>  | Inclusion and exclusion criteria for participants. If applicable, eligibility criteria for study centres and individuals who will perform the interventions (eg, surgeons, psychotherapists)                                                                                                                                                                                   | 6   |
| Interventions: description      | <a href="#">#11a</a> | Interventions for each group with sufficient detail to allow replication, including how and when they will be administered                                                                                                                                                                                                                                                     | 7-8 |
| Interventions: modifications    | <a href="#">#11b</a> | Criteria for discontinuing or modifying allocated interventions for a given trial participant (eg, drug dose change in response to harms, participant request, or improving / worsening disease)                                                                                                                                                                               | N/A |
| Interventions: adherence        | <a href="#">#11c</a> | Strategies to improve adherence to intervention protocols, and any procedures for monitoring adherence (eg, drug tablet return; laboratory tests)                                                                                                                                                                                                                              | N/A |
| Interventions: concomitant care | <a href="#">#11d</a> | Relevant concomitant care and interventions that are permitted or prohibited during the trial                                                                                                                                                                                                                                                                                  | N/A |
| Outcomes                        | <a href="#">#12</a>  | Primary, secondary, and other outcomes, including the specific measurement variable (eg, systolic blood pressure), analysis metric (eg, change from baseline, final value, time to event), method of aggregation (eg, median, proportion), and time point for each outcome. Explanation of the clinical relevance of chosen efficacy and harm outcomes is strongly recommended | 10  |

|    |                                  |                      |                                                                                                                                                                                                                                                                                                                                                          |                      |
|----|----------------------------------|----------------------|----------------------------------------------------------------------------------------------------------------------------------------------------------------------------------------------------------------------------------------------------------------------------------------------------------------------------------------------------------|----------------------|
| 1  | Participant timeline             | <a href="#">#13</a>  | Time schedule of enrolment, interventions (including any run-ins and washouts), assessments, and visits for participants. A schematic diagram is highly recommended (see Figure)                                                                                                                                                                         | 6                    |
| 2  |                                  |                      |                                                                                                                                                                                                                                                                                                                                                          |                      |
| 3  |                                  |                      |                                                                                                                                                                                                                                                                                                                                                          |                      |
| 4  |                                  |                      |                                                                                                                                                                                                                                                                                                                                                          |                      |
| 5  |                                  |                      |                                                                                                                                                                                                                                                                                                                                                          |                      |
| 6  |                                  |                      |                                                                                                                                                                                                                                                                                                                                                          |                      |
| 7  |                                  |                      |                                                                                                                                                                                                                                                                                                                                                          |                      |
| 8  |                                  |                      |                                                                                                                                                                                                                                                                                                                                                          |                      |
| 9  | Sample size                      | <a href="#">#14</a>  | Estimated number of participants needed to achieve study objectives and how it was determined, including clinical and statistical assumptions supporting any sample size calculations                                                                                                                                                                    | 6                    |
| 10 |                                  |                      |                                                                                                                                                                                                                                                                                                                                                          |                      |
| 11 |                                  |                      |                                                                                                                                                                                                                                                                                                                                                          |                      |
| 12 |                                  |                      |                                                                                                                                                                                                                                                                                                                                                          |                      |
| 13 |                                  |                      |                                                                                                                                                                                                                                                                                                                                                          |                      |
| 14 |                                  |                      |                                                                                                                                                                                                                                                                                                                                                          |                      |
| 15 |                                  |                      |                                                                                                                                                                                                                                                                                                                                                          |                      |
| 16 |                                  |                      |                                                                                                                                                                                                                                                                                                                                                          |                      |
| 17 | Recruitment                      | <a href="#">#15</a>  | Strategies for achieving adequate participant enrolment to reach target sample size                                                                                                                                                                                                                                                                      | 6                    |
| 18 |                                  |                      |                                                                                                                                                                                                                                                                                                                                                          |                      |
| 19 |                                  |                      |                                                                                                                                                                                                                                                                                                                                                          |                      |
| 20 |                                  |                      |                                                                                                                                                                                                                                                                                                                                                          |                      |
| 21 | <b>Methods:</b>                  |                      |                                                                                                                                                                                                                                                                                                                                                          |                      |
| 22 | <b>Assignment of</b>             |                      |                                                                                                                                                                                                                                                                                                                                                          |                      |
| 23 | <b>interventions (for</b>        |                      |                                                                                                                                                                                                                                                                                                                                                          |                      |
| 24 | <b>controlled trials)</b>        |                      |                                                                                                                                                                                                                                                                                                                                                          |                      |
| 25 |                                  |                      |                                                                                                                                                                                                                                                                                                                                                          |                      |
| 26 |                                  |                      |                                                                                                                                                                                                                                                                                                                                                          |                      |
| 27 |                                  |                      |                                                                                                                                                                                                                                                                                                                                                          |                      |
| 28 | Allocation: sequence generation  | <a href="#">#16a</a> | Method of generating the allocation sequence (eg, computer-generated random numbers), and list of any factors for stratification. To reduce predictability of a random sequence, details of any planned restriction (eg, blocking) should be provided in a separate document that is unavailable to those who enrol participants or assign interventions | 6                    |
| 29 |                                  |                      |                                                                                                                                                                                                                                                                                                                                                          |                      |
| 30 |                                  |                      |                                                                                                                                                                                                                                                                                                                                                          |                      |
| 31 |                                  |                      |                                                                                                                                                                                                                                                                                                                                                          |                      |
| 32 |                                  |                      |                                                                                                                                                                                                                                                                                                                                                          |                      |
| 33 |                                  |                      |                                                                                                                                                                                                                                                                                                                                                          |                      |
| 34 |                                  |                      |                                                                                                                                                                                                                                                                                                                                                          |                      |
| 35 |                                  |                      |                                                                                                                                                                                                                                                                                                                                                          |                      |
| 36 |                                  |                      |                                                                                                                                                                                                                                                                                                                                                          |                      |
| 37 |                                  |                      |                                                                                                                                                                                                                                                                                                                                                          |                      |
| 38 |                                  |                      |                                                                                                                                                                                                                                                                                                                                                          |                      |
| 39 |                                  |                      |                                                                                                                                                                                                                                                                                                                                                          |                      |
| 40 |                                  |                      |                                                                                                                                                                                                                                                                                                                                                          |                      |
| 41 | Allocation concealment mechanism | <a href="#">#16b</a> | Mechanism of implementing the allocation sequence (eg, central telephone; sequentially numbered, opaque, sealed envelopes), describing any steps to conceal the sequence until interventions are assigned                                                                                                                                                | 6                    |
| 42 |                                  |                      |                                                                                                                                                                                                                                                                                                                                                          |                      |
| 43 |                                  |                      |                                                                                                                                                                                                                                                                                                                                                          |                      |
| 44 |                                  |                      |                                                                                                                                                                                                                                                                                                                                                          |                      |
| 45 |                                  |                      |                                                                                                                                                                                                                                                                                                                                                          |                      |
| 46 |                                  |                      |                                                                                                                                                                                                                                                                                                                                                          |                      |
| 47 |                                  |                      |                                                                                                                                                                                                                                                                                                                                                          |                      |
| 48 |                                  |                      |                                                                                                                                                                                                                                                                                                                                                          |                      |
| 49 | Allocation: implementation       | <a href="#">#16c</a> | Who will generate the allocation sequence, who will enrol participants, and who will assign participants to interventions                                                                                                                                                                                                                                | N/A not been decided |
| 50 |                                  |                      |                                                                                                                                                                                                                                                                                                                                                          |                      |
| 51 |                                  |                      |                                                                                                                                                                                                                                                                                                                                                          |                      |
| 52 |                                  |                      |                                                                                                                                                                                                                                                                                                                                                          |                      |
| 53 |                                  |                      |                                                                                                                                                                                                                                                                                                                                                          |                      |
| 54 | Blinding (masking)               | <a href="#">#17a</a> | Who will be blinded after assignment to interventions (eg, trial participants, care                                                                                                                                                                                                                                                                      | 6                    |
| 55 |                                  |                      |                                                                                                                                                                                                                                                                                                                                                          |                      |
| 56 |                                  |                      |                                                                                                                                                                                                                                                                                                                                                          |                      |
| 57 |                                  |                      |                                                                                                                                                                                                                                                                                                                                                          |                      |
| 58 |                                  |                      |                                                                                                                                                                                                                                                                                                                                                          |                      |
| 59 |                                  |                      |                                                                                                                                                                                                                                                                                                                                                          |                      |
| 60 |                                  |                      |                                                                                                                                                                                                                                                                                                                                                          |                      |

providers, outcome assessors, data analysts),  
and how

Blinding (masking): [#17b](#) If blinded, circumstances under which unblinding is permissible, and procedure for revealing a participant's allocated intervention during the trial

**Methods: Data collection, management, and analysis**

Data collection plan [#18a](#) Plans for assessment and collection of outcome, baseline, and other trial data, including any related processes to promote data quality (eg, duplicate 6measurements, training of assessors) and a description of study instruments (eg, questionnaires, laboratory tests) along with their reliability and validity, if known. Reference to where data collection forms can be found, if not in the protocol

Data collection plan: [#18b](#) Plans to promote participant retention and complete follow-up, including list of any outcome data to be collected for participants who discontinue or deviate from intervention protocols

Data management [#19](#) Plans for data entry, coding, security, and storage, including any related processes to promote data quality (eg, double data entry; range checks for data values). Reference to where details of data management procedures can be found, if not in the protocol

Statistics: outcomes [#20a](#) Statistical methods for analysing primary and secondary outcomes. Reference to where other details of the statistical analysis plan can be found, if not in the protocol

Statistics: additional analyses [#20b](#) Methods for any additional analyses (eg, subgroup and adjusted analyses)

|    |                      |                      |                                                      |       |
|----|----------------------|----------------------|------------------------------------------------------|-------|
| 1  | Statistics: analysis | <a href="#">#20c</a> | Definition of analysis population relating to        | 11    |
| 2  | population and       |                      | protocol non-adherence (eg, as randomised            |       |
| 3  | missing data         |                      | analysis), and any statistical methods to handle     |       |
| 4  |                      |                      | missing data (eg, multiple imputation)               |       |
| 5  |                      |                      |                                                      |       |
| 6  |                      |                      |                                                      |       |
| 7  |                      |                      |                                                      |       |
| 8  | <b>Methods:</b>      |                      |                                                      |       |
| 9  | <b>Monitoring</b>    |                      |                                                      |       |
| 10 |                      |                      |                                                      |       |
| 11 | Data monitoring:     | <a href="#">#21a</a> | Composition of data monitoring committee             | N/A   |
| 12 | formal committee     |                      | (DMC); summary of its role and reporting             |       |
| 13 |                      |                      | structure; statement of whether it is independent    |       |
| 14 |                      |                      | from the sponsor and competing interests; and        |       |
| 15 |                      |                      | reference to where further details about its         |       |
| 16 |                      |                      | charter can be found, if not in the protocol.        |       |
| 17 |                      |                      | Alternatively, an explanation of why a DMC is        |       |
| 18 |                      |                      | not needed                                           |       |
| 19 |                      |                      |                                                      |       |
| 20 | Data monitoring:     | <a href="#">#21b</a> | Description of any interim analyses and stopping     |       |
| 21 | interim analysis     |                      | guidelines, including who will have access to        |       |
| 22 |                      |                      | these interim results and make the final decision    |       |
| 23 |                      |                      | to terminate the trial                               |       |
| 24 |                      |                      |                                                      |       |
| 25 |                      |                      |                                                      |       |
| 26 |                      |                      |                                                      |       |
| 27 |                      |                      |                                                      |       |
| 28 |                      |                      |                                                      |       |
| 29 |                      |                      |                                                      |       |
| 30 |                      |                      |                                                      |       |
| 31 | Harms                | <a href="#">#22</a>  | Plans for collecting, assessing, reporting, and      |       |
| 32 |                      |                      | managing solicited and spontaneously reported        |       |
| 33 |                      |                      | adverse events and other unintended effects of       |       |
| 34 |                      |                      | trial interventions or trial conduct                 |       |
| 35 |                      |                      |                                                      |       |
| 36 |                      |                      |                                                      |       |
| 37 |                      |                      |                                                      |       |
| 38 | Auditing             | <a href="#">#23</a>  | Frequency and procedures for auditing trial          |       |
| 39 |                      |                      | conduct, if any, and whether the process will be     |       |
| 40 |                      |                      | independent from investigators and the sponsor       |       |
| 41 |                      |                      |                                                      |       |
| 42 |                      |                      |                                                      |       |
| 43 | <b>Ethics and</b>    |                      |                                                      |       |
| 44 | <b>dissemination</b> |                      |                                                      |       |
| 45 |                      |                      |                                                      |       |
| 46 |                      |                      |                                                      |       |
| 47 | Research ethics      | <a href="#">#24</a>  | Plans for seeking research ethics committee /        | 12-13 |
| 48 | approval             |                      | institutional review board (REC / IRB) approval      |       |
| 49 |                      |                      |                                                      |       |
| 50 |                      |                      |                                                      |       |
| 51 | Protocol             | <a href="#">#25</a>  | Plans for communicating important protocol           | N/A   |
| 52 | amendments           |                      | modifications (eg, changes to eligibility criteria,  |       |
| 53 |                      |                      | outcomes, analyses) to relevant parties (eg,         |       |
| 54 |                      |                      | investigators, REC / IRBs, trial participants, trial |       |
| 55 |                      |                      | registries, journals, regulators)                    |       |
| 56 |                      |                      |                                                      |       |
| 57 |                      |                      |                                                      |       |
| 58 |                      |                      |                                                      |       |
| 59 |                      |                      |                                                      |       |
| 60 |                      |                      |                                                      |       |

|    |                       |                      |                                                    |       |
|----|-----------------------|----------------------|----------------------------------------------------|-------|
| 1  | Consent or assent     | <a href="#">#26a</a> | Who will obtain informed consent or assent from    | 12    |
| 2  |                       |                      | potential trial participants or authorised         |       |
| 3  |                       |                      | surrogates, and how (see Item 32)                  |       |
| 4  |                       |                      |                                                    |       |
| 5  |                       |                      |                                                    |       |
| 6  | Consent or assent:    | <a href="#">#26b</a> | Additional consent provisions for collection and   | N/A   |
| 7  | ancillary studies     |                      | use of participant data and biological specimens   |       |
| 8  |                       |                      | in ancillary studies, if applicable                |       |
| 9  |                       |                      |                                                    |       |
| 10 |                       |                      |                                                    |       |
| 11 | Confidentiality       | <a href="#">#27</a>  | How personal information about potential and       | 12-13 |
| 12 |                       |                      | enrolled participants will be collected, shared,   |       |
| 13 |                       |                      | and maintained in order to protect confidentiality |       |
| 14 |                       |                      | before, during, and after the trial                |       |
| 15 |                       |                      |                                                    |       |
| 16 |                       |                      |                                                    |       |
| 17 |                       |                      |                                                    |       |
| 18 | Declaration of        | <a href="#">#28</a>  | Financial and other competing interests for        | 13    |
| 19 | interests             |                      | principal investigators for the overall trial and  |       |
| 20 |                       |                      | each study site                                    |       |
| 21 |                       |                      |                                                    |       |
| 22 |                       |                      |                                                    |       |
| 23 |                       |                      |                                                    |       |
| 24 | Data access           | <a href="#">#29</a>  | Statement of who will have access to the final     | 13    |
| 25 |                       |                      | trial dataset, and disclosure of contractual       |       |
| 26 |                       |                      | agreements that limit such access for              |       |
| 27 |                       |                      | investigators                                      |       |
| 28 |                       |                      |                                                    |       |
| 29 |                       |                      |                                                    |       |
| 30 | Ancillary and post    | <a href="#">#30</a>  | Provisions, if any, for ancillary and post-trial   | None  |
| 31 | trial care            |                      | care, and for compensation to those who suffer     |       |
| 32 |                       |                      | harm from trial participation                      |       |
| 33 |                       |                      |                                                    |       |
| 34 |                       |                      |                                                    |       |
| 35 |                       |                      |                                                    |       |
| 36 | Dissemination         | <a href="#">#31a</a> | Plans for investigators and sponsor to             | 13    |
| 37 | policy: trial results |                      | communicate trial results to participants,         |       |
| 38 |                       |                      | healthcare professionals, the public, and other    |       |
| 39 |                       |                      | relevant groups (eg, via publication, reporting in |       |
| 40 |                       |                      | results databases, or other data sharing           |       |
| 41 |                       |                      | arrangements), including any publication           |       |
| 42 |                       |                      | restrictions                                       |       |
| 43 |                       |                      |                                                    |       |
| 44 |                       |                      |                                                    |       |
| 45 |                       |                      |                                                    |       |
| 46 |                       |                      |                                                    |       |
| 47 | Dissemination         | <a href="#">#31b</a> | Authorship eligibility guidelines and any intended | 13    |
| 48 | policy: authorship    |                      | use of professional writers                        |       |
| 49 |                       |                      |                                                    |       |
| 50 |                       |                      |                                                    |       |
| 51 | Dissemination         | <a href="#">#31c</a> | Plans, if any, for granting public access to the   | None  |
| 52 | policy: reproducible  |                      | full protocol, participant-level dataset, and      |       |
| 53 | research              |                      | statistical code                                   |       |
| 54 |                       |                      |                                                    |       |
| 55 |                       |                      |                                                    |       |
| 56 | <b>Appendices</b>     |                      |                                                    |       |
| 57 |                       |                      |                                                    |       |
| 58 |                       |                      |                                                    |       |
| 59 |                       |                      |                                                    |       |
| 60 |                       |                      |                                                    |       |

|                                       |                            |                     |                                                                                                                                                                                                |                                                                             |
|---------------------------------------|----------------------------|---------------------|------------------------------------------------------------------------------------------------------------------------------------------------------------------------------------------------|-----------------------------------------------------------------------------|
| 1<br>2<br>3<br>4<br>5<br>6<br>7<br>8  | Informed consent materials | <a href="#">#32</a> | Model consent form and other related documentation given to participants and authorised surrogates                                                                                             | N/A the study was granted including consent forms, by national review board |
| 9<br>10<br>11<br>12<br>13<br>14<br>15 | Biological specimens       | <a href="#">#33</a> | Plans for collection, laboratory evaluation, and storage of biological specimens for genetic or molecular analysis in the current trial and for future use in ancillary studies, if applicable | N/A                                                                         |

16 None The SPIRIT checklist is distributed under the terms of the Creative Commons Attribution  
17 License CC-BY-ND 3.0. This checklist can be completed online using <https://www.goodreports.org/>, a  
18 tool made by the [EQUATOR Network](#) in collaboration with [Penelope.ai](#)  
19  
20  
21  
22  
23  
24  
25  
26  
27  
28  
29  
30  
31  
32  
33  
34  
35  
36  
37  
38  
39  
40  
41  
42  
43  
44  
45  
46  
47  
48  
49  
50  
51  
52  
53  
54  
55  
56  
57  
58  
59  
60

# BMJ Open

## Primary prevention of stroke: engaging everyday activities promoting health – a randomised controlled pilot trial protocol

|                                 |                                                                                                                                                                                                                                                                                                                                                                                                                                                                                                                                                                                                                                                                                                                                |
|---------------------------------|--------------------------------------------------------------------------------------------------------------------------------------------------------------------------------------------------------------------------------------------------------------------------------------------------------------------------------------------------------------------------------------------------------------------------------------------------------------------------------------------------------------------------------------------------------------------------------------------------------------------------------------------------------------------------------------------------------------------------------|
| Journal:                        | <i>BMJ Open</i>                                                                                                                                                                                                                                                                                                                                                                                                                                                                                                                                                                                                                                                                                                                |
| Manuscript ID                   | bmjopen-2019-031984.R2                                                                                                                                                                                                                                                                                                                                                                                                                                                                                                                                                                                                                                                                                                         |
| Article Type:                   | Protocol                                                                                                                                                                                                                                                                                                                                                                                                                                                                                                                                                                                                                                                                                                                       |
| Date Submitted by the Author:   | 10-Sep-2019                                                                                                                                                                                                                                                                                                                                                                                                                                                                                                                                                                                                                                                                                                                    |
| Complete List of Authors:       | Patomella, Ann-Helen; Karolinska Institute, Department of Neurobiology, Care Sciences and Society<br>Guidetti, Susanne; Karolinska Institutet, Neurobiology, Care Science and Society<br>Mälstam, Emelie; Karolinska Institute, Department of Neurobiology, Care Sciences and Society<br>Eriksson, Christina; Karolinska Institute, Department of Neurobiology, Care Sciences and Society<br>Bergström, Aileen; Karolinska Institutet Department of Neurobiology Care Sciences and Society<br>Åkesson, Elisabet; Karolinska Institute, Department of Neurobiology, Care Sciences and Society<br>Kottorp, Anders; Malmö Universitet<br>Asaba, Eric; Karolinska Institute, Department of Neurobiology, Care Sciences and Society |
| <b>Primary Subject Heading</b>: | Health services research                                                                                                                                                                                                                                                                                                                                                                                                                                                                                                                                                                                                                                                                                                       |
| Secondary Subject Heading:      | Rehabilitation medicine                                                                                                                                                                                                                                                                                                                                                                                                                                                                                                                                                                                                                                                                                                        |
| Keywords:                       | Stroke < NEUROLOGY, Prevention, Mhealth, PRIMARY CARE, stroke risk, occupational therapy                                                                                                                                                                                                                                                                                                                                                                                                                                                                                                                                                                                                                                       |
|                                 |                                                                                                                                                                                                                                                                                                                                                                                                                                                                                                                                                                                                                                                                                                                                |

SCHOLARONE™  
Manuscripts

1  
2  
3  
4 **Primary prevention of stroke: engaging everyday activities promoting health – a**  
5 **randomised controlled pilot trial protocol**  
6  
7  
8

9 Patomella AH (ORCID 0000-0003-2667-4073)<sup>1</sup>, Guidetti S ( ORCID 0000-0001-6878-6394) <sup>1</sup>,  
10 Mälstam E (ORCID 0000-0002-0840-6342)<sup>1, 2</sup>, Eriksson C (ORCID 0000-0002-0546-1151)<sup>1, 3</sup>,  
11 Bergström A (ORCID 0000-0002-7091-7514)<sup>1</sup> , Åkesson E (ORCID 0000-0002-8227-  
12 9118)<sup>5,6</sup>, Kottorp A (ORCID 0000-0002-8976-2612)<sup>4</sup>, and Asaba E (ORCID 0000-0002-6910-  
13 3468)<sup>1</sup> .  
14  
15  
16

17  
18 <sup>1</sup>Department of Neurobiology, Care Sciences and Society, Division of Occupational Therapy,  
19 Karolinska Institutet, Stockholm, Sweden  
20

21 <sup>2</sup>Faculty of Health and Occupational studies, Department of Public health and Sport  
22 sciences, University of Gävle, Sweden  
23

24 <sup>3</sup> Academic Primary Healthcare Centre, Stockholm  
25

26 <sup>4</sup>University of Malmö  
27

28 <sup>5</sup>Department of Neurobiology, Care Sciences and Society, Division of Neurogeriatrics,  
29 Karolinska Institutet, Stockholm, Sweden  
30

31 <sup>6</sup>R&D Unit, Stockholms Sjukhem, Stockholm, Sweden  
32  
33  
34  
35  
36  
37  
38  
39  
40  
41  
42  
43  
44  
45  
46  
47  
48  
49  
50  
51  
52  
53  
54  
55  
56  
57  
58  
59  
60



**Corresponding author:**

Ann-Helen Patomella, Department of Neurobiology, Care Sciences and Society, Division of Occupational Therapy, Karolinska Institutet, Stockholm, Sweden

Email address: ann-helen.patomella@ki.se

Phone number: +46 852483726

\* I, the Submitting Author has the right to grant and does grant on behalf of all authors of the Work (as defined in the below author licence), an exclusive licence and/or a non-exclusive licence for contributions from authors who are: i) UK Crown employees; ii) where BMJ has agreed a CC-BY licence shall apply, and/or iii) in accordance with the terms applicable for US Federal Government officers or employees acting as part of their official duties; on a worldwide, perpetual, irrevocable, royalty-free basis to BMJ Publishing Group Ltd ("BMJ") its licensees and where the relevant Journal is co-owned by BMJ to the co-owners of the Journal, to publish the Work in BMJ Open and any other BMJ products and to exploit all rights, as set out in our licence.

The Submitting Author accepts and understands that any supply made under these terms is made by BMJ to the Submitting Author unless you are acting as an employee on behalf of your employer or a postgraduate student of an affiliated institution which is paying any applicable article publishing charge ("APC") for Open Access articles. Where the Submitting Author wishes to make the Work available on an Open Access basis (and intends to pay the relevant APC), the terms of reuse of such Open Access shall be governed by a Creative Commons licence – details of these licences and which Creative Commons licence will apply to this Work are set out in our licence referred to above.

**Word count:** 4121 (excluding title page, abstract and references).

**Protocol version:** 9<sup>th</sup> of September 2019. Version 3.0

**Trial Registration number:** ClinicalTrials.gov Identifier: NCT03730701

## **Abstract**

### Introduction

Stroke is a globally common disease that has detrimental effects on the individual and, more broadly, on society. Lifestyle change can contribute to reducing risk factors for stroke.

Although there are direct benefits of a healthy lifestyle, sustaining and incorporating healthy activities into everyday life is a challenge. Engaging everyday activities have the potential to support lifestyle change and promote sustainable activity patterns. Current healthcare is failing to reduce modifiable risk factors in people at risk, and in addition to current practice, there is a need for systematic and efficient non-pharmacological and non-surgical stroke prevention strategies. The aim of the pilot study is to increase knowledge about the effects of a prevention programme and its feasibility to promote sustainable and healthy activity patterns among persons at risk for stroke.

### Methods and analysis

The proposed pilot study will be a two-armed randomised, assessor-blinded, parallel pilot trial. The study will include feasibility data, investigating acceptability and delivery of the intervention. Persons at risk of stroke (n=60) will be included in a mobile phone-supported prevention programme. The 10-week programme will be conducted at primary healthcare clinics, combining group meetings and online resources to support self-management of lifestyle change. Main outcomes are stroke risk, lifestyle habits and healthy activity pattern. Assessments will be performed at baseline and at follow-up (immediately following the end of the programme and at 6 and 12 months). Effects of the programme will be analysed using inferential statistics. Feasibility will be analysed using both qualitative and quantitative methods.

### Ethics and dissemination

The study has been approved by the Regional Ethical Review Board in Stockholm, Sweden, being granted Ref. Nos. 2015/834-31, 2016/2203-32 and 2019/01444. Study results will be disseminated through peer-review journals and presentations to mixed audiences at regional and international conferences.

## Article Summary

### Strengths and limitations of this study

- A major strength of the proposed study is the utilisation of engaging everyday activities as a mediator for sustainable lifestyle change.
- The study is designed as a randomised controlled trial and will provide preliminary data on the effects of a prevention programme for persons at risk of stroke.
- Mobile phone technology will be used to support lifestyle change processes among participants.
- The combination of qualitative and quantitative data systematically collected before and after the intervention period will provide rich data, which is useful for analysing the feasibility of the programme and its impact on the health and well-being of persons at risk of stroke.
- A limitation of the study is a relatively small sample size, which can result in insufficient power to determine effects.

## INTRODUCTION

Stroke is the second leading cause of death globally and the disease burden based on disability-adjusted life years (DALYs), which is a measure of years lost due to death, poor health or disability has risen(1). The residual effects of stroke detrimentally impact on quality of life in terms of limiting physical, social, and emotional health both for persons with stroke and their caregivers (2). Subsequently, the economic impact of stroke in Sweden is estimated at 76,000 Euros per person for the first 2 years after the event, not including indirect costs such as loss of income and family burden (1). The magnitude of the problem can be put into context, considering evidence that suggests that many of the risk factors for stroke and other cardiovascular events are modifiable: tobacco use, excessive alcohol consumption, type 2 diabetes, hypertension, physical inactivity and dietary intake leading to high cholesterol and/or obesity (1, 3). Meaningful and purposeful everyday activities combined with moderate physical activities and a healthy diet has been found to be strongly related to well-being and longevity (4, 5). However, a recent focus-group study with general practitioners in a Swedish primary healthcare context revealed that there was a lack of systematic screening of stroke risk and adherence to risk factor modification was rare (6).

### **Theoretical concept of the prevention program**

The prevention program in this study is a theoretically grounded, complex intervention (7). The programme is based on activities in people's everyday lives and integrates health and well-being with what people do, as well as with what they want or need to do, in order to thrive and live well (8, 9).

In this protocol, the term lifestyle is used to conceptualize and define activity patterns (individual actions and behaviour) in everyday life that may or may not contribute to health. Lifestyle change refers to a conscious change of behaviour and everyday activities in order to promote health. The process of changing behaviour results from an interaction between the person (e.g. self-efficacy), the environment (support and material) and the action (10). In the project, the key behavioural change technique (11), is incorporating engaging everyday activities (EEA) that contribute to a healthy lifestyle. This might include changing the form of current EEAs or finding new health-promoting EEAs.

### *Engaging everyday activity – a game-changer*

Although the benefits of healthy lifestyle are clear (3, 12) the long-term effect and maintenance of healthy lifestyle are not (13-16). The effectiveness of primary healthcare-based physical activity's interventions are inconclusive (17). There is evidence for short-term improvements, but there is a lack of evidence for long-term effects (14). Successfully and

1  
2  
3 sustainably incorporating healthy lifestyle patterns into everyday life is a challenge for many  
4 people. Engaging everyday activities (EEA) are seen as the means and goal for changing  
5 and sustaining a healthy lifestyle. EEAs occur in the interaction between the individual and  
6 the sociocultural setting (18). The concept of EEA refers to an individual perception of  
7 personal activities that are valuable, meaningful and purposeful, as well as providing an  
8 intense sense of participation, EEAs are activities are done regularly and part of a person's  
9 life (19). EEAs can go beyond personal pleasure and can have a higher level of importance  
10 due to meaning for others such as family, friends or society at large. EEAs are the things that  
11 people do that make life worth living and that can contribute to well-being (9, 19, 20). Studies  
12 have shown that promoting EEAs can have positive health impacts for older adults (8, 18, 21,  
13 22). Example of how EEAs can be modified to increase health is for example to change a  
14 sedentary EEA to a more physically demanding activity e.g. a person who engage in listening  
15 to music, to regularly go out to dance or listening to music while taking a walk or run.  
16 However, EEAs can also lead to ill health in cases where the EEA to the sedimentation of  
17 risk factors in everyday life such as sedentary behaviours or an unhealthy diet. Although  
18 EEAs can be a key to incorporating positive change and sustainable healthy lifestyle choices  
19 to reduce the risk for stroke, there is a need to systematically explore this further.  
20  
21  
22  
23  
24  
25  
26  
27  
28  
29

### 30 *Sharing personal experiences as part of a change process*

31  
32  
33 The intervention in the present study espouses the idea that personal experiences should be  
34 the point of departure for a person-centred prevention programme, enabling individual  
35 autonomy in decisions regarding lifestyle change. Sharing experiences, shared activities and  
36 reflections lead to learning about one's own stroke risk, activity patterns and habits. Bryan  
37 and colleagues (23) have used theories to summarise five central principles for adult  
38 learning: a) adults need to know why they are learning; b) adults need to be motivated to  
39 learn by the need to solve problems; c) adults' previous experiences must be respected and  
40 built upon; d) learning approaches should match adults' backgrounds and diversity; e) adults  
41 need to be actively involved in the learning process. The programme will be tailored to match  
42 needs and competences of the individual and build on participants' previous experiences. In  
43 addition to increase literacy with regard to stroke risk and change, there is a need to learn  
44 how to use digital support systems efficiently. Participants in the study will be actively  
45 involved in setting their own goals because this is important in order to manage their health  
46 while following the programme.  
47  
48  
49  
50  
51  
52  
53  
54

### 55 **Objectives of the proposed study**

56  
57  
58 The aim is to gain knowledge concerning the effectiveness of a prevention programme in  
59 promoting sustainable and healthy activity patterns and enabling lifestyle change together  
60

1  
2  
3 with and among people at risk of stroke. The study's aim is also to gain knowledge about the  
4 feasibility and usefulness of a research protocol that includes a mobile phone application  
5 (app).  
6  
7  
8  
9

## 10 **METHODS AND ANALYSIS**

### 11 **Design**

12  
13  
14 The pilot study will be a two-armed randomised, assessor-blinded, parallel pilot trial. The  
15 protocol also includes a feasibility study combining qualitative interviews and descriptive  
16 quantitative data, investigating the acceptability and delivery of the intervention (24).  
17  
18

### 19 **Study setting**

20  
21 The study will be conducted in close collaboration with Primary healthcare clinics (PHC) in  
22 the Stockholm area (different parts of Stockholm in order to reach a diverse population of  
23 healthcare seekers) and in PHCs in both urban and rural areas in the County Council of  
24 Gävleborg.  
25  
26  
27

### 28 **Sample size and power considerations**

29  
30 This study is an explorative pilot and feasibility study; no statistical power analyses have  
31 been calculated. A total sample of 60 participants will be enrolled of which 30 will be  
32 randomized to intervention group. It is estimated that a total of four PHCs will participate and  
33 deliver the intervention, (two from rural and urban Stockholm, two from rural and urban  
34 Gävleborg) each running an intervention group with 8-10 participants. A drop-out rate of 20%  
35 is expected, resulting in a total of n= 26 in the intervention and control groups, respectively.  
36  
37  
38  
39  
40

### 41 **Participant timeline**

42  
43 Participant enrolment will be started in June 2019 and the last qualitative interview is  
44 scheduled for before June 2020. During this period, 60 participants are expected to be  
45 enrolled in the study (30 controls and 30 in the intervention group).  
46  
47  
48

### 49 **Participants: Eligibility criteria**

50  
51 Persons at risk of stroke will be included in the project and recruitment will be by means of  
52 advertisements in local newspapers, webpage and at PHCs. A stroke risk screening survey  
53 (potential participants are either self-screened online or screened by a professional at their  
54 PHC) will be used to find eligible participants. A total sample of n=60 participants (persons at  
55 risk of stroke), divided into two arms (30+30) intervention and controls is estimated. Block  
56 randomisation will be utilised with a block size of four (2 control=A and 2 intervention=B, with  
57  
58  
59  
60

1  
2  
3 blocks of 4 having random block orders: AABB, ABAB, ABBA, BABA, BAAB, and BBAA) to  
4 allocate patients to either the intervention or the control group (25). The intervention group  
5 will participate in a stroke-prevention programme- Active Lifestyle. The controls will be  
6 offered standard care by the PHCs. All participants will be given a leaflet with advice on how  
7 to manage modifiable risk factors. Allocation will be done following baseline assessment.  
8 Allocation sequence will be done by an independent researcher not involved in data  
9 collection nor intervention. The researchers who are assessors of outcomes will be blinded to  
10 allocation until end of the study. Inclusion criteria are that the participants a) have a high risk  
11 for stroke according to the Stroke Risk Score card (26) i.e. at least three risk factors scored  
12 as high risk. The Stroke risk score card was developed as an easy to use self-assessment  
13 tool by the National Stroke Association in United Kingdom. The tool has been used in a few  
14 studies to detect risk factors for stroke (27, 28). The Stroke Risk Scorecard was chosen over  
15 other stroke risk screening tools as it includes modifiable risk factors for stroke and is easy to  
16 score for participants, also for those that have limited English language skills as the  
17 questions and answers are easy to understand, b) are motivated for lifestyle change (asked  
18 about their motivation to take part in a lifestyle program) c) motivated for participating in a  
19 digital lifestyle prevention (including user of a smart phone or tablet), d) are between 45-70  
20 years old and without a diagnosis of dementia or cognitive impairment hindering  
21 participation. Exclusion criteria are having previously had a Stroke or TIA diagnosis and lack  
22 of understanding the Swedish language.

23  
24  
25  
26  
27  
28  
29  
30  
31  
32  
33  
34  
35  
36  
37  
38  
39  
40  
41  
42  
43  
44  
45  
46  
47  
48  
49  
50  
51  
52  
53  
54  
55  
56  
57  
58  
59  
60  
The researchers will encourage and guide any participant who experiences health-related  
problems during the programme (both intervention and control group) to get in contact with  
his or her general practitioner, GP. All participants may choose to interrupt their participation  
in the study at any time. The researcher can also discontinue a participant's participation  
based on health issues or reasons that might jeopardize that person's safety. Reasons for  
interruption will be recorded.

### **Active Lifestyle – a stroke-prevention programme**

The prevention programme is based on earlier research evidence and theoretical  
underpinnings as presented, and on preliminary studies conducted by the research group  
(6). The inter-professional research group together with health professionals and technicians  
had a total of four workshops during 2015-2017 with the aim of modelling the components  
and themes of the programme. A logic model (29) was created in order to plan and organise  
the intervention. The logic model was used to visualise possible conflicts, barriers,  
contradictions, needed resources, activities, outputs and impacts of the research process.

The Active Lifestyle prevention programme enables healthy activity patterns and aims to reduce the risk of stroke by means of four strategies: a) the incorporation of health-promoting EEAs, b) the use of mobile phone technology to increase health literacy and awareness of current habits and to foster self-management c) forming new habits that prompt conscious decisions to make healthy choices, and d) setting realistic goals and sharing experience in a learning environment.

#### *Duration and specific content of the intervention programme*

The Active Lifestyle stroke-prevention programme is an 11-week programme. The intervention will include 5 sessions over 5 weeks with a booster session 6 weeks later. The programme starts with an individual meeting (baseline) and with a follow-up assessment one week after the last group session. During the intervention, participants will work actively with their self-chosen both EEAs and habits in order to change behaviour and lifestyle. For example, a person may have reading as an EEA, an activity that is relatively neutral on a continuum of health-promotion. The activity might be experienced as engaging and meaningful, and contribute to psychological wellbeing, but a redesign of the activity could be walking or exercising at the gym while listening to an audio book, leading to health benefits which could be accepted and incorporated into the individual's activity patterns. During the programme, the participants will become aware of their current lifestyle habits as well as new habits that are formed by the participants themselves. New habits may be cued by situations (such as seeing an escalator) prompting a health-promoting behaviour and making a conscious decision (e.g. to take the stairs) (30). The program is expected to foster self-management skills and the continuation a change process following the program period.

Each module has a theme and relevant activities. Group dynamics are used to reflect on experiences, doing and future goals. The modules, presented in table 1, are delivered by an interventionist/researcher (not involved in assessment) together with a trained health professional (training during two half-days), for example an occupational therapist, physiotherapist or dietician. Each module will last 90 minutes and will be held at the participating PHCs, in their premises. To avoid contamination, the health professionals are instructed to not deliver the program to other patients during the research period. The program is new to the PHCs and has not been delivered before.

Table 1: Summary of module themes, concepts and activities supporting a change process

| Module theme                                       | Concepts                                         | Activity                                            |
|----------------------------------------------------|--------------------------------------------------|-----------------------------------------------------|
| 1: Risk factors for stroke and engaging activities | Health literacy concerning stroke risk, engaging | Peer interview on engaging activities. Learn how to |



|                                                                                                     |                                                                      |                                                            |
|-----------------------------------------------------------------------------------------------------|----------------------------------------------------------------------|------------------------------------------------------------|
|                                                                                                     | activities, change process, expectations                             | register in the app. Set three lifestyle change goals      |
| 2: Physical activity                                                                                | Physical activity, physical inactivity                               | Try a physical group exercise class at a gym               |
| 3: Diet and health                                                                                  | Dietary routines and change                                          | Prepare and test a healthy sandwich                        |
| 4: Balanced everyday life                                                                           | Activity balance, stress                                             | Relaxation, for example medical yoga                       |
| 5: Sustained health: routines and activity patterns                                                 | Current and desired routines and activity patterns, revisiting goals | Walking session                                            |
| Booster session: "Future horizon", identity, self-management of health and social aspects of health | Self-management, view of the self, social support                    | Preparing healthy snacks and walking and talking in a park |

### *The mobile phone app*

The app for the project was developed in close collaboration with ScientificMed Tech AB (<http://www.scientificmed.com>). ScientificMed Tech has a solid track record with publications on similar platforms (31, 32). The digital platform includes several unique aspects in the data input logic, which contributes to immediate feedback on progress as well as tracking of personally tailored goals related to stroke risk in the context of everyday life. The app includes six domains for registering daily activities, experiences and behaviours: Goal achievements (questions on how well the person has achieved the three pre-set goals and self-efficacy), Physical activity (registering step counts, registering 24 hr time use in relation to exercise, moderate intense activities, sleep, sedentary activities and other activities), Engaging everyday activities (participating in EEAs and self-efficacy), Tobacco and alcohol use (registering consumption), Stress levels (questions about perceived time-pressure) and Dietary habits (registering consumption of fruits/vegetables, breakfast, fish and snacks). Registrations result in graphs and plots that inform the participant of current behaviours and which serve as feedback on habits. The six domains are based on modifiable risk factors for stroke as presented by the American Heart Association (3) with the addition of promoting EEAs and reducing stress. The purpose of the app is to support the participant's change process via registration, feedback and self-management of habits and behaviours that impact on health and risk of stroke. Novice technology users will have extra training in the use of the technology and the app.

### **Data collection**

All of the instruments measuring primary and secondary outcomes will be collected at baseline, at follow-up and at 6 and 12 months. Demographic data will be collected at baseline. During baseline assessment, all participants will be informed of their stroke risk factors and motivational interviewing techniques will be used to identify problem areas in relation to lifestyle habits. All qualitative interviews will be semi-structured and an interview guide will be used. Interviews will be digitally recorded.

### *Background and demographic data*

Background data will include: weight, height (in order to calculate Body Mass Index) and blood pressure. Survey data will be gathered for health literacy of stroke risk (33), experiences of time pressure (stress), readiness and motivation for change (34), current mobile phone use and mapping out engaging everyday activities.

### *Feasibility data*

A combination of qualitative and quantitative data will be collected among the interventionists and the participants using surveys, log books and qualitative interviews. In order to investigate acceptability of the programme, there will be analysis of patient recruitment, data collection, assessment tools, digital platforms and procedures. Items from the System Usability Scale (35) will be used to investigate ease of use of the Active Lifestyle app. In addition, usage-tracking tools and usage analytics will be used to obtain indicators of the feasibility and acceptability of the app. Data will include participants' daily self-reports and check-ins for ratings (e.g. goal-achievements, daily activities and dietary habits). Semi-structured qualitative exit interviews will be conducted by a researcher not involved in developing and delivering the intervention programme in order to investigate the acceptability of the programme. Participants (persons at risk of stroke) and healthcare professionals delivering the programme will be invited to participate in individual and focus-group exit interviews.

### *Outcome data*

The primary outcome measures will be lifestyle habits and healthy activity patterns. Lifestyle habits will be measured using a lifestyle habits survey. *The Swedish Lifestyle habits survey* is based on guidelines for prevention by the National Board of Health and Welfare in Sweden (36), with the aim of registering and treating unhealthy lifestyle habits in primary healthcare. The survey includes questions in four domains: physical activity, alcohol consumption, tobacco use and dietary intake. Healthy activity patterns are measured using *the Pleasure, Productivity and Restoration profile (PPR)* (37, 38) extended with a health domain and will map out the participants' everyday activity repertoire.

### *Secondary outcomes*

Secondary outcomes will measure life satisfaction, quality of life, activity balance and activity performance and satisfaction. *LiSat-11* measures life satisfaction (39). *EQ-5D* will be used to measure quality of life (40). The participants' level of occupational balance will be measured with the *Occupational Balance Questionnaire (OBQ)*, giving insight into yet another perspective of the implications of how activities of everyday life can impact health (41). The *Canadian Occupational Performance Measure (COPM)* measures subjective performance and satisfaction with individually chosen activities (42). COPM will be used to measure EEAs that the participants find difficult to perform and will also guide the participants to formulate three self-chosen goals for lifestyle change based on identified problem areas in relation to

1  
2  
3 lifestyle habits. The COPM scores importance, performance and satisfaction in chosen  
4 activities and upholds psychometric properties of validity and reliability (43, 44). *The 6 Minute*  
5 *Walk Test* will be used to measure physical function (45).  
6  
7  
8  
9

## 10 **Data Analysis Plan**

### 11 *Feasibility of the intervention*

12  
13 Data collected from surveys, log books on recruitment and dropout, and logs from the app  
14 registrations will be entered, analysed and summarised. To promote data quality range  
15 checks for data values will be conducted. Descriptive statistical analyses will be conducted in  
16 order to report on feasibility of the study: recruitment, drop-outs, retention rate and  
17 adherence. Data from app registrations will be used to report on how the participants use the  
18 app, and on trends and goal achievements. Other app-related information of interest is the  
19 need for technical assistance. The investigators will assess patterns of app use over time.  
20 Conditions and events facilitating and/or hindering the delivery of the sessions and potential  
21 complications will be registered by the researchers and interventionists and presented.  
22 Qualitative interviews will be transcribed verbatim. All identifying factors will be removed (i.e.  
23 names) during transcription. Copies of the digital recordings will be destroyed after  
24 transcription is completed. Interview transcriptions will be stored in the university's database.  
25 Qualitative materials will be analysed using thematic qualitative analyses (46).  
26  
27  
28  
29  
30  
31  
32  
33

### 34 *Evaluation of outcomes*

35  
36 The preliminary treatment effects will be analysed on an intention-to-treat basis, with  
37 randomised participants retaining their original allocated group, and measured as differences  
38 between groups at follow-up and at 12 months. The study data will be examined for outliers,  
39 normality and missing data. Analyses of covariance will be used for continuous outcomes  
40 with baseline values as covariates. Logistic regression analyses will be used for dichotomous  
41 outcomes. The level of significance will be set at  $p \leq 0.05$  and the confidence level at 95%.  
42 We will use the SPSS (Version 22.0) to analyse the data. These analyses will provide  
43 preliminary results for the relative effectiveness of the intervention programme and will inform  
44 subsequent randomised controlled trials.  
45  
46  
47  
48  
49  
50  
51  
52

## 53 **Patient and Public Involvement**

54 A previous case study including six persons following transient ischemic attack (TIA) and at  
55 risk of stroke was conducted in order to test the intervention model and to identify the needs  
56 and experiences of the participants. The content of the current intervention is based on the  
57 feasibility of the intervention given to the TIA group and adjusted in relation to the  
58  
59  
60

1  
2  
3 participants' experiences, needs and preferences. For example in the TIA study, the  
4 preliminary results suggests that the participants highly valued the group meetings. Physical  
5 activities such as walking in the nature and dancing were experienced as EEA. Experiences  
6 of the participants in the proposed pilot study of managing the app (e.g. challenges,  
7 suggested changes, layout, and period of utilisation) and their experiences of the research  
8 protocol and procedures will be used to inform and redesign any future version of the app  
9 and the study protocol (before a full scale RCT). The qualitative data from the interviews will  
10 report the participants' experiences of taking part in the programme.  
11  
12  
13  
14  
15  
16

## 17 **Discussion**

18 The theoretical base of the protocol is strong and based on EEA's as the mediator and goal  
19 for decreasing the risk of stroke and living a healthy life. Mobile phone technology is enabling  
20 the change process by offering individual feedback and an increasing awareness of current  
21 lifestyle and registration of new habits. This pilot study will provide preliminary data on the  
22 effects and feasibility of the Active Lifestyle prevention programme and its measures and  
23 procedures. Rich data on the impact and experiences of the programme will be provided  
24 from semi-structured interviews, log books, app registrations, outcome measures and  
25 surveys. The limitation of the study is the lack of a validated outcome measure on stroke risk,  
26 and there is a need to translate and validate an assessment such as the Stroke Riskometer  
27 (47) to a Swedish population. Self-reported measures will be used in the study and there is a  
28 risk for bias since reporting might not be accurate, therefore observational measures such as  
29 BMI, the 6-minute walk test are used as outcomes. The strength of the study lies in the  
30 robustness of the RCT design. The small sample size will limit the study's ability to determine  
31 effects of the protocol, however the main aim of the pilot study is not just to determine  
32 effects, but also to investigate procedures and feasibility, and so the sample size is  
33 considered to be sufficient in order to test the protocol in the primary healthcare setting. A  
34 potential limitation is the risk for too small samples that does not provide sufficient diversity of  
35 the study population in relation to age, sex, rurality and socio-economic status (SES),  
36 therefore we have chosen to include PHCs from different areas (rural and urban and from  
37 different SES diverse areas) and to set the time for the group meetings to late in the  
38 afternoon to also facilitate participation from persons that work fulltime. The risk for  
39 contamination between groups are assessed to be minimal if any. Participants to the control  
40 and intervention groups are recruited via newspaper advertisement and PHCs in a large city.  
41 Interventionists do not have any intervention activities with controls. The study design does  
42 not include an attention-control group and the dosage of attention is higher for the  
43 intervention group than the controls, although both groups do receive an analysis of stroke  
44 risks and will set three self-chosen lifestyle change goals at baseline.  
45  
46  
47  
48  
49  
50  
51  
52  
53  
54  
55  
56  
57  
58  
59  
60

## ETHICS AND DISSEMINATION

The project invites and includes people at risk of stroke who, in different ways, may be faced with vulnerable situations due to their health and lifestyle. This invitation may be perceived as both an unwanted reminder of potential health complications such as stroke, while at the same time offering participation in developing a preventive programme with the aim of reducing the risk. The strength is that study participation is offered to the individual, who may or may not choose to respond. The potential participant will be informed both verbally and in writing and given a chance to ask questions before the researcher asks for written informed consent. An approval from the Regional Ethical Review Board in Stockholm, Sweden has been granted (Ref. Nos. 2015/834-31, 2016/2203-32 and 2019/01444). In accordance with the general data protection regulation, GDPR, the participants will be informed of their right to withdraw at any time and of how their data will be managed. All data will be stored securely and all participant information will be stored and locked with limited access. All records will be identified by a coded number. The code number will be stored separately. All local databases will be password-protected. To ensure confidentiality, data shared to project team members will be blinded of any identifying participant information. Study participation is not expected to lead to risks or complications, although stroke risk factors will be monitored and possible health consequences will be transferred to the regional primary healthcare, it is expected to support the participating person's health self-management. The findings will be published in peer-reviewed journals. The results will also be presented to participants, staff and decision-makers involved in the study, other healthcare professionals and the general public through national and international conferences.

## AUTHOR CONTRIBUTIONS

AHP, EA and SG conceived the original idea and outline of the study. EM is implementing the protocol in primary healthcare settings, with oversight and review by AHP, EA and SG. AK, AB, CE and EÅ contributed to the design of the study. AHP wrote the study protocol together with EA, SG and AB. All authors discussed and commented on draft versions and approved the final version. The group would also like to acknowledge Professor Kerstin Tham, Malmö University for initiating the project and for developing the conceptual ideas of EEA in stroke prevention.

## FUNDING STATEMENT

This work was funded by grants from Vårdal Foundation, grant nr 2014-0108 and from the research school of Health Care Science, Karolinska Institutet. This funding source had no

1  
2  
3 role in the design of this study and will not have any role during its execution, analyses,  
4 interpretation of the data, or decision to submit results.  
5  
6

7  
8 **COMPETING INTERESTS**

9 The authors declare that they have no competing interests.  
10  
11  
12  
13  
14  
15  
16  
17  
18  
19  
20  
21  
22  
23  
24  
25  
26  
27  
28  
29  
30  
31  
32  
33  
34  
35  
36  
37  
38  
39  
40  
41  
42  
43  
44  
45  
46  
47  
48  
49  
50  
51  
52  
53  
54  
55  
56  
57  
58  
59  
60

For peer review only

## REFERENCES

1. Habner J. Preventing stroke: Uneven progress. A global policy research programme. 2017.
2. Bergstrom AL, Eriksson G, von Koch L, Tham K. Combined life satisfaction of persons with stroke and their caregivers: associations with caregiver burden and the impact of stroke. *Health and quality of life outcomes*. 2011;9:1.
3. Goldstein LB, Bushnell CD, Adams RJ, Appel LJ, Braun LT, Chaturvedi S, et al. Guidelines for the primary prevention of stroke: a guideline for healthcare professionals from the American Heart Association/American Stroke Association. *Stroke*. 2011;42(2):517-84.
4. Poulain M, Herm A, Pes G. The Blue Zones: areas of exceptional longevity around the world. *Vienna Yearbook of Population Research*. 2013;11(1):87.
5. Steptoe A, Deaton A, Stone AA. Psychological wellbeing, health and ageing. *Lancet (London, England)*. 2015;385(9968):640.
6. Patomella A-H, Mickols G, Asaba E, Nilsson G, Fridén C, Kottorp A, et al. General practitioners' reasoning on risk screening and primary prevention of stroke – a focus group study. *BMC family practice*. 2018;19(1):190.
7. Craig P, Dieppe P, Macintyre S, Michie S, Nazareth I, Petticrew M, et al. Developing and evaluating complex interventions: the new Medical Research Council guidance. *BMJ*. 2008;337:a1655.
8. Clark F, Azen SP, Zemke R, Jackson J, Carlson M, Mandel D, et al. Occupational therapy for independent-living older adults: A randomized controlled trial. *Jama*. 1997;278(16):1321-6.
9. Asaba E, Patomella A-H, Guidetti S, Kottorp A, Tham K. Att främja hälsa och förebygga ohälsa genom engagerande aktiviteter: Ett exempel från prevention av stroke [Eng: Promoting health and prevention of ill-health through engaging activities]. In: Kroksmark U, editor. *Hälsa och Aktivitet i Vardagen - ur ett arbetsterapeutiskt perspektiv*. Nacka: Sveriges Arbetsterapeuter; 2018.
10. Bandura A. Self-efficacy: toward a unifying theory of behavioral change. *Psychol Rev*. 1977;84(2):191-215.
11. Michie S, Johnston M. Theories and techniques of behaviour change: Developing a cumulative science of behaviour change. *Health Psychology Review*. 2012;6(1):1-6.
12. Chiuve SE, Rexrode KM, Spiegelman D, Logroscino G, Manson JE, Rimm EB. Primary prevention of stroke by healthy lifestyle. *Circulation*. 2008;118(9):947.
13. Taylor AH, Cable NT, Faulkner G, Hillsdon M, Narici M, Van Der Bij AK. Physical activity and older adults: a review of health benefits and the effectiveness of interventions. *Journal of Sports Sciences*. 2004;22(8):703-25.
14. Eakin EG, Glasgow RE, Riley KM. Review of primary care-based physical activity intervention studies. *Journal of Family Practice*. 2000;49(2):158-.
15. Müller-Riemenschneider F, Reinhold T, Nocon M, Willich SN. Long-term effectiveness of interventions promoting physical activity: a systematic review. *Preventive medicine*. 2008;47(4):354-68.
16. Weiss EC, Galuska DA, Khan LK, Gillespie C, Serdula MK. Weight regain in US adults who experienced substantial weight loss, 1999–2002. *American journal of preventive medicine*. 2007;33(1):34-40.
17. Hillsdon M, Thorogood M, White I, Foster C. Advising people to take more exercise is ineffective: a randomized controlled trial of physical activity promotion in primary care. *International journal of epidemiology*. 2002;31(4):808-15.
18. Jackson J, Carlson M, Mandel D, Zemke R, Clark F. Occupation in lifestyle redesign: The well elderly study occupational therapy program. *The American Journal of Occupational Therapy*. 1998;52(5):326-36.
19. Jonsson H. A new direction in the conceptualization and categorization of occupation. *Journal of Occupational Science*. 2008;15(1):3-8.



- 1
- 2
- 3 20. Asaba E, Bergstrom A, Patomella A-H, Guidetti S. Engaging occupations among persons
- 4 at risk for stroke: A health paradox. Submitted.
- 5 21. Clark F, Jackson J, Carlson M, Chou C-P, Cherry BJ, Jordan-Marsh M, et al. Effectiveness
- 6 of a lifestyle intervention in promoting the well-being of independently living older people: results of
- 7 the Well Elderly 2 Randomised Controlled Trial. *Journal of epidemiology and community health*.
- 8 2012;66(9):782-90.
- 9 22. Mountain G, Windle G, Hind D, Walters S, Keertharuth A, Chatters R, et al. A
- 10 preventative lifestyle intervention for older adults (lifestyle matters): a randomised controlled trial.
- 11 *Age and ageing*. 2017;46(4):627-34.
- 12 23. Bryan RL, Kreuter MW, Brownson RC. Integrating adult learning principles into training
- 13 for public health practice. *Health promotion practice*. 2009;10(4):557-63.
- 14 24. O’Cathain A, Hoddinott P, Lewin S, Thomas KJ, Young B, Adamson J, et al. Maximising
- 15 the impact of qualitative research in feasibility studies for randomised controlled trials: guidance for
- 16 researchers. *Pilot and feasibility studies*. 2015;1(1):32.
- 17 25. Sedgwick P. Block randomisation. *BMJ*. 2011;343:d7139.
- 18 26. National Stroke Association. Stroke Risk Score Card 2018 Retrived 10<sup>th</sup> of August 2019
- 19 from: <https://www.stroke.org/stroke-risk-scorecard-2018/>.
- 20 27. Aycock DM, Kirkendoll KD, Coleman KC, Clark PC, Albright KC, Alexandrov AW. Family
- 21 history of stroke among African Americans and its association with risk factors, knowledge,
- 22 perceptions, and exercise. *The Journal of cardiovascular nursing*. 2015;30(2):E1.
- 23 28. Anderson J, Godwin KM, Petersen NJ, Willson P, Kent TA. A pilot test of
- 24 videoconferencing to improve access to a stroke risk-reduction programme for Veterans. *Journal of*
- 25 *telemedicine and telecare*. 2013;19(3):153-9.
- 26 29. WK Kellogg Foundation. WK Kellogg Foundation logic model development guide: WK
- 27 Kellogg Foundation; 2004.
- 28 30. Gardner B. A review and analysis of the use of ‘habit’ in understanding, predicting and
- 29 influencing health-related behaviour. *Health Psychology Review*. 2015;9(3):277-95.
- 30 31. Nyström CD, Sandin S, Henriksson P, Henriksson H, Trolle-Lagerros Y, Larsson C, et al.
- 31 Mobile-based intervention intended to stop obesity in preschool-aged children: the MINISTOP
- 32 randomized controlled trial. *The American Journal of Clinical Nutrition*. 2017:1-7.
- 33 32. Johnston N, Bodegard J, Jerström S, Åkesson J, Brorsson H, Alfredsson J, et al. Effects
- 34 of interactive patient smartphone support app on drug adherence and lifestyle changes in myocardial
- 35 infarction patients: A randomized study. *American Heart Journal*. 2016;178:85-94.
- 36 33. Dearborn JL, McCullough LD. Perception of risk and knowledge of risk factors in
- 37 women at high risk for stroke. *Stroke*. 2009;40(4):1181-6.
- 38 34. Prochaska JO, Redding CA, Evers KE. The transtheoretical model and stages of change.
- 39 *Health behavior: Theory, research, and practice*. 2015:125-48.
- 40 35. Brooke J. SUS-A quick and dirty usability scale. *Usability evaluation in industry*.
- 41 1996;189(194):4-7.
- 42 36. Socialstyrelsen. Nationella riktlinjer för prevention och behandling vid ohälsosamma
- 43 levnadsvanor [Eng: National Guidelines for prevention and treatment of un-healthy lifestyle habits].
- 44 2018.
- 45 37. Atler KE. User-perceived utility of the Daily Experiences of Pleasure, Productivity, and
- 46 Restoration Profile. *Can J Occup Ther*. 2015;82(4):235-44.
- 47 38. Atler KE, Barney L, Moravec A, Sample PL, Fruhauf CA. The Daily Experiences of
- 48 Pleasure, Productivity, and Restoration Profile: A case study: Etude de cas sur l'utilite du Daily
- 49 Experiences of Pleasure, Productivity, and Restoration Profile. *Can J Occup Ther*. 2017;84(4-5):262-
- 50 72.
- 51 39. Fugl-Meyer AR, Melin R, Fugl-Meyer KS. Life satisfaction in 18-to 64-year-old Swedes:
- 52 in relation to gender, age, partner and immigrant status. *Journal of rehabilitation medicine*.
- 53 2002;34(5):239-46.
- 54
- 55
- 56
- 57
- 58
- 59
- 60

- 1  
2  
3 40. Burström K, Johannesson M, Diderichsen F. Swedish population health-related quality  
4 of life results using the EQ-5D. *Quality of life research*. 2001;10(7):621-35.
- 5 41. Wagman P, Håkansson C. Introducing the occupational balance questionnaire (OBQ).  
6 *Scandinavian journal of occupational therapy*. 2014;21(3):227-31.
- 7 42. Law M, Baptiste S, McColl M, Opzoomer A, Polatajko H, Pollock N. The Canadian  
8 occupational performance measure: an outcome measure for occupational therapy. *Canadian*  
9 *Journal of Occupational Therapy*. 1990;57(2):82-7.
- 10 43. Dedding C, Cardol M, Eyssen ICJM, Beelen A. Validity of the Canadian Occupational  
11 Performance Measure: a client-centred outcome measurement. *Clinical Rehabilitation*.  
12 2004;18(6):660-7.
- 13 44. Cup EH, op Reimer WS, Thijssen MC, van Kuyk-Minis M. Reliability and validity of the  
14 Canadian Occupational Performance Measure in stroke patients. *Clinical rehabilitation*.  
15 2003;17(4):402.
- 16 45. Enright PL, Sherrill DL. Reference equations for the six-minute walk in healthy adults.  
17 *American journal of respiratory and critical care medicine*. 1998;158(5):1384-7.
- 18 46. Charmaz K. *Constructing grounded theory: A practical guide through qualitative*  
19 *analysis*: Sage; 2006.
- 20 47. Parmar P, Krishnamurthi R, Ikram MA, Hofman A, Mirza SS, Varakin Y, et al. The Stroke  
21 Riskometer TM App: Validation of a data collection tool and stroke risk predictor. *International*  
22 *Journal of Stroke*. 2015;10(2):231-44.
- 23  
24  
25  
26  
27  
28  
29  
30  
31  
32  
33  
34  
35  
36  
37  
38  
39  
40  
41  
42  
43  
44  
45  
46  
47  
48  
49  
50  
51  
52  
53  
54  
55  
56  
57  
58  
59  
60

# Reporting checklist for protocol of a clinical trial.

Based on the SPIRIT guidelines.

## Instructions to authors

Complete this checklist by entering the page numbers from your manuscript where readers will find each of the items listed below.

Your article may not currently address all the items on the checklist. Please modify your text to include the missing information. If you are certain that an item does not apply, please write "n/a" and provide a short explanation.

Upload your completed checklist as an extra file when you submit to a journal.

In your methods section, say that you used the SPIRIT reporting guidelines, and cite them as:

Chan A-W, Tetzlaff JM, Altman DG, Laupacis A, Gøtzsche PC, Krleža-Jerić K, Hróbjartsson A, Mann H, Dickersin K, Berlin J, Doré C, Parulekar W, Summerskill W, Groves T, Schulz K, Sox H, Rockhold FW, Rennie D, Moher D. SPIRIT 2013 Statement: Defining standard protocol items for clinical trials. *Ann Intern Med.* 2013;158(3):200-207

|                                   |                     | Reporting Item                                                                                               | Page Number                          |
|-----------------------------------|---------------------|--------------------------------------------------------------------------------------------------------------|--------------------------------------|
| <b>Administrative information</b> |                     |                                                                                                              |                                      |
| Title                             | <a href="#">#1</a>  | Descriptive title identifying the study design, population, interventions, and, if applicable, trial acronym | 1                                    |
| Trial registration                | <a href="#">#2a</a> | Trial identifier and registry name. If not yet registered, name of intended registry                         | 2                                    |
| Trial registration: data set      | <a href="#">#2b</a> | All items from the World Health Organization Trial Registration Data Set                                     | N/A a registration has not been done |
| Protocol version                  | <a href="#">#3</a>  | Date and version identifier                                                                                  | 2                                    |
| Funding                           | <a href="#">#4</a>  | Sources and types of financial, material, and other support                                                  | 13                                   |

|    |                      |                     |                                                     |               |
|----|----------------------|---------------------|-----------------------------------------------------|---------------|
| 1  | Roles and            | <a href="#">#5a</a> | Names, affiliations, and roles of protocol          | 13            |
| 2  | responsibilities:    |                     | contributors                                        |               |
| 3  | contributorship      |                     |                                                     |               |
| 4  |                      |                     |                                                     |               |
| 5  |                      |                     |                                                     |               |
| 6  | Roles and            | <a href="#">#5b</a> | Name and contact information for the trial          | N/A, no trial |
| 7  | responsibilities:    |                     | sponsor                                             | sponsor       |
| 8  | sponsor contact      |                     |                                                     |               |
| 9  | information          |                     |                                                     |               |
| 10 |                      |                     |                                                     |               |
| 11 |                      |                     |                                                     |               |
| 12 |                      |                     |                                                     |               |
| 13 | Roles and            | <a href="#">#5c</a> | Role of study sponsor and funders, if any, in       | N/A           |
| 14 | responsibilities:    |                     | study design; collection, management, analysis,     |               |
| 15 | sponsor and funder   |                     | and interpretation of data; writing of the report;  |               |
| 16 |                      |                     | and the decision to submit the report for           |               |
| 17 |                      |                     | publication, including whether they will have       |               |
| 18 |                      |                     | ultimate authority over any of these activities     |               |
| 19 |                      |                     |                                                     |               |
| 20 |                      |                     |                                                     |               |
| 21 |                      |                     |                                                     |               |
| 22 |                      |                     |                                                     |               |
| 23 | Roles and            | <a href="#">#5d</a> | Composition, roles, and responsibilities of the     | N/A           |
| 24 | responsibilities:    |                     | coordinating centre, steering committee,            |               |
| 25 | committees           |                     | endpoint adjudication committee, data               |               |
| 26 |                      |                     | management team, and other individuals or           |               |
| 27 |                      |                     | groups overseeing the trial, if applicable (see     |               |
| 28 |                      |                     | Item 21a for data monitoring committee)             |               |
| 29 |                      |                     |                                                     |               |
| 30 |                      |                     |                                                     |               |
| 31 |                      |                     |                                                     |               |
| 32 |                      |                     |                                                     |               |
| 33 | <b>Introduction</b>  |                     |                                                     |               |
| 34 |                      |                     |                                                     |               |
| 35 | Background and       | <a href="#">#6a</a> | Description of research question and justification  | 4-5           |
| 36 | rationale            |                     | for undertaking the trial, including summary of     |               |
| 37 |                      |                     | relevant studies (published and unpublished)        |               |
| 38 |                      |                     | examining benefits and harms for each               |               |
| 39 |                      |                     | intervention                                        |               |
| 40 |                      |                     |                                                     |               |
| 41 |                      |                     |                                                     |               |
| 42 |                      |                     |                                                     |               |
| 43 | Background and       | <a href="#">#6b</a> | Explanation for choice of comparators               | 9             |
| 44 | rationale: choice of |                     |                                                     |               |
| 45 | comparators          |                     |                                                     |               |
| 46 |                      |                     |                                                     |               |
| 47 |                      |                     |                                                     |               |
| 48 | Objectives           | <a href="#">#7</a>  | Specific objectives or hypotheses                   | 5             |
| 49 |                      |                     |                                                     |               |
| 50 |                      |                     |                                                     |               |
| 51 | Trial design         | <a href="#">#8</a>  | Description of trial design including type of trial |               |
| 52 |                      |                     | (eg, parallel group, crossover, factorial, single   |               |
| 53 |                      |                     | group), allocation ratio, and framework (eg,        |               |
| 54 |                      |                     | superiority, equivalence, non-inferiority,          |               |
| 55 |                      |                     | exploratory)                                        |               |
| 56 |                      |                     |                                                     |               |
| 57 |                      |                     |                                                     |               |
| 58 |                      |                     |                                                     |               |
| 59 |                      |                     |                                                     |               |
| 60 |                      |                     |                                                     |               |

1 **Methods:**

2 **Participants,**

3 **interventions, and**

4 **outcomes**

|    |                                 |                      |                                                                                                                                                                                                                                                                                                                                                                                |
|----|---------------------------------|----------------------|--------------------------------------------------------------------------------------------------------------------------------------------------------------------------------------------------------------------------------------------------------------------------------------------------------------------------------------------------------------------------------|
| 5  |                                 |                      |                                                                                                                                                                                                                                                                                                                                                                                |
| 6  |                                 |                      |                                                                                                                                                                                                                                                                                                                                                                                |
| 7  |                                 |                      |                                                                                                                                                                                                                                                                                                                                                                                |
| 8  | Study setting                   | <a href="#">#9</a>   | Description of study settings (eg, community clinic, academic hospital) and list of countries where data will be collected. Reference to where list of study sites can be obtained                                                                                                                                                                                             |
| 9  |                                 |                      | 6                                                                                                                                                                                                                                                                                                                                                                              |
| 10 |                                 |                      |                                                                                                                                                                                                                                                                                                                                                                                |
| 11 |                                 |                      |                                                                                                                                                                                                                                                                                                                                                                                |
| 12 |                                 |                      |                                                                                                                                                                                                                                                                                                                                                                                |
| 13 |                                 |                      |                                                                                                                                                                                                                                                                                                                                                                                |
| 14 | Eligibility criteria            | <a href="#">#10</a>  | Inclusion and exclusion criteria for participants. If applicable, eligibility criteria for study centres and individuals who will perform the interventions (eg, surgeons, psychotherapists)                                                                                                                                                                                   |
| 15 |                                 |                      | 6                                                                                                                                                                                                                                                                                                                                                                              |
| 16 |                                 |                      |                                                                                                                                                                                                                                                                                                                                                                                |
| 17 |                                 |                      |                                                                                                                                                                                                                                                                                                                                                                                |
| 18 |                                 |                      |                                                                                                                                                                                                                                                                                                                                                                                |
| 19 |                                 |                      |                                                                                                                                                                                                                                                                                                                                                                                |
| 20 |                                 |                      |                                                                                                                                                                                                                                                                                                                                                                                |
| 21 | Interventions: description      | <a href="#">#11a</a> | Interventions for each group with sufficient detail to allow replication, including how and when they will be administered                                                                                                                                                                                                                                                     |
| 22 |                                 |                      | 7-8                                                                                                                                                                                                                                                                                                                                                                            |
| 23 |                                 |                      |                                                                                                                                                                                                                                                                                                                                                                                |
| 24 |                                 |                      |                                                                                                                                                                                                                                                                                                                                                                                |
| 25 |                                 |                      |                                                                                                                                                                                                                                                                                                                                                                                |
| 26 | Interventions: modifications    | <a href="#">#11b</a> | Criteria for discontinuing or modifying allocated interventions for a given trial participant (eg, drug dose change in response to harms, participant request, or improving / worsening disease)                                                                                                                                                                               |
| 27 |                                 |                      | N/A                                                                                                                                                                                                                                                                                                                                                                            |
| 28 |                                 |                      |                                                                                                                                                                                                                                                                                                                                                                                |
| 29 |                                 |                      |                                                                                                                                                                                                                                                                                                                                                                                |
| 30 |                                 |                      |                                                                                                                                                                                                                                                                                                                                                                                |
| 31 |                                 |                      |                                                                                                                                                                                                                                                                                                                                                                                |
| 32 |                                 |                      |                                                                                                                                                                                                                                                                                                                                                                                |
| 33 |                                 |                      |                                                                                                                                                                                                                                                                                                                                                                                |
| 34 |                                 |                      |                                                                                                                                                                                                                                                                                                                                                                                |
| 35 | Interventions: adherence        | <a href="#">#11c</a> | Strategies to improve adherence to intervention protocols, and any procedures for monitoring adherence (eg, drug tablet return; laboratory tests)                                                                                                                                                                                                                              |
| 36 |                                 |                      | N/A                                                                                                                                                                                                                                                                                                                                                                            |
| 37 |                                 |                      |                                                                                                                                                                                                                                                                                                                                                                                |
| 38 |                                 |                      |                                                                                                                                                                                                                                                                                                                                                                                |
| 39 |                                 |                      |                                                                                                                                                                                                                                                                                                                                                                                |
| 40 |                                 |                      |                                                                                                                                                                                                                                                                                                                                                                                |
| 41 |                                 |                      |                                                                                                                                                                                                                                                                                                                                                                                |
| 42 | Interventions: concomitant care | <a href="#">#11d</a> | Relevant concomitant care and interventions that are permitted or prohibited during the trial                                                                                                                                                                                                                                                                                  |
| 43 |                                 |                      | N/A                                                                                                                                                                                                                                                                                                                                                                            |
| 44 |                                 |                      |                                                                                                                                                                                                                                                                                                                                                                                |
| 45 |                                 |                      |                                                                                                                                                                                                                                                                                                                                                                                |
| 46 | Outcomes                        | <a href="#">#12</a>  | Primary, secondary, and other outcomes, including the specific measurement variable (eg, systolic blood pressure), analysis metric (eg, change from baseline, final value, time to event), method of aggregation (eg, median, proportion), and time point for each outcome. Explanation of the clinical relevance of chosen efficacy and harm outcomes is strongly recommended |
| 47 |                                 |                      | 10                                                                                                                                                                                                                                                                                                                                                                             |
| 48 |                                 |                      |                                                                                                                                                                                                                                                                                                                                                                                |
| 49 |                                 |                      |                                                                                                                                                                                                                                                                                                                                                                                |
| 50 |                                 |                      |                                                                                                                                                                                                                                                                                                                                                                                |
| 51 |                                 |                      |                                                                                                                                                                                                                                                                                                                                                                                |
| 52 |                                 |                      |                                                                                                                                                                                                                                                                                                                                                                                |
| 53 |                                 |                      |                                                                                                                                                                                                                                                                                                                                                                                |
| 54 |                                 |                      |                                                                                                                                                                                                                                                                                                                                                                                |
| 55 |                                 |                      |                                                                                                                                                                                                                                                                                                                                                                                |
| 56 |                                 |                      |                                                                                                                                                                                                                                                                                                                                                                                |
| 57 |                                 |                      |                                                                                                                                                                                                                                                                                                                                                                                |
| 58 |                                 |                      |                                                                                                                                                                                                                                                                                                                                                                                |
| 59 |                                 |                      |                                                                                                                                                                                                                                                                                                                                                                                |
| 60 |                                 |                      |                                                                                                                                                                                                                                                                                                                                                                                |

|    |                           |                      |                                                                                                                                                                                                                                                                                                                                                                               |                         |
|----|---------------------------|----------------------|-------------------------------------------------------------------------------------------------------------------------------------------------------------------------------------------------------------------------------------------------------------------------------------------------------------------------------------------------------------------------------|-------------------------|
| 1  | Participant timeline      | <a href="#">#13</a>  | Time schedule of enrolment, interventions<br>(including any run-ins and washouts),<br>assessments, and visits for participants. A<br>schematic diagram is highly recommended (see<br>Figure)                                                                                                                                                                                  | 6                       |
| 2  |                           |                      |                                                                                                                                                                                                                                                                                                                                                                               |                         |
| 3  |                           |                      |                                                                                                                                                                                                                                                                                                                                                                               |                         |
| 4  |                           |                      |                                                                                                                                                                                                                                                                                                                                                                               |                         |
| 5  |                           |                      |                                                                                                                                                                                                                                                                                                                                                                               |                         |
| 6  |                           |                      |                                                                                                                                                                                                                                                                                                                                                                               |                         |
| 7  |                           |                      |                                                                                                                                                                                                                                                                                                                                                                               |                         |
| 8  |                           |                      |                                                                                                                                                                                                                                                                                                                                                                               |                         |
| 9  | Sample size               | <a href="#">#14</a>  | Estimated number of participants needed to<br>achieve study objectives and how it was<br>determined, including clinical and statistical<br>assumptions supporting any sample size<br>calculations                                                                                                                                                                             | 6                       |
| 10 |                           |                      |                                                                                                                                                                                                                                                                                                                                                                               |                         |
| 11 |                           |                      |                                                                                                                                                                                                                                                                                                                                                                               |                         |
| 12 |                           |                      |                                                                                                                                                                                                                                                                                                                                                                               |                         |
| 13 |                           |                      |                                                                                                                                                                                                                                                                                                                                                                               |                         |
| 14 |                           |                      |                                                                                                                                                                                                                                                                                                                                                                               |                         |
| 15 |                           |                      |                                                                                                                                                                                                                                                                                                                                                                               |                         |
| 16 |                           |                      |                                                                                                                                                                                                                                                                                                                                                                               |                         |
| 17 | Recruitment               | <a href="#">#15</a>  | Strategies for achieving adequate participant<br>enrolment to reach target sample size                                                                                                                                                                                                                                                                                        | 6                       |
| 18 |                           |                      |                                                                                                                                                                                                                                                                                                                                                                               |                         |
| 19 |                           |                      |                                                                                                                                                                                                                                                                                                                                                                               |                         |
| 20 |                           |                      |                                                                                                                                                                                                                                                                                                                                                                               |                         |
| 21 | <b>Methods:</b>           |                      |                                                                                                                                                                                                                                                                                                                                                                               |                         |
| 22 | <b>Assignment of</b>      |                      |                                                                                                                                                                                                                                                                                                                                                                               |                         |
| 23 | <b>interventions (for</b> |                      |                                                                                                                                                                                                                                                                                                                                                                               |                         |
| 24 | <b>controlled trials)</b> |                      |                                                                                                                                                                                                                                                                                                                                                                               |                         |
| 25 |                           |                      |                                                                                                                                                                                                                                                                                                                                                                               |                         |
| 26 |                           |                      |                                                                                                                                                                                                                                                                                                                                                                               |                         |
| 27 |                           |                      |                                                                                                                                                                                                                                                                                                                                                                               |                         |
| 28 | Allocation: sequence      | <a href="#">#16a</a> | Method of generating the allocation sequence<br>(eg, computer-generated random numbers), and<br>list of any factors for stratification. To reduce<br>predictability of a random sequence, details of<br>any planned restriction (eg, blocking) should be<br>provided in a separate document that is<br>unavailable to those who enrol participants or<br>assign interventions | 6                       |
| 29 | generation                |                      |                                                                                                                                                                                                                                                                                                                                                                               |                         |
| 30 |                           |                      |                                                                                                                                                                                                                                                                                                                                                                               |                         |
| 31 |                           |                      |                                                                                                                                                                                                                                                                                                                                                                               |                         |
| 32 |                           |                      |                                                                                                                                                                                                                                                                                                                                                                               |                         |
| 33 |                           |                      |                                                                                                                                                                                                                                                                                                                                                                               |                         |
| 34 |                           |                      |                                                                                                                                                                                                                                                                                                                                                                               |                         |
| 35 |                           |                      |                                                                                                                                                                                                                                                                                                                                                                               |                         |
| 36 |                           |                      |                                                                                                                                                                                                                                                                                                                                                                               |                         |
| 37 |                           |                      |                                                                                                                                                                                                                                                                                                                                                                               |                         |
| 38 |                           |                      |                                                                                                                                                                                                                                                                                                                                                                               |                         |
| 39 |                           |                      |                                                                                                                                                                                                                                                                                                                                                                               |                         |
| 40 |                           |                      |                                                                                                                                                                                                                                                                                                                                                                               |                         |
| 41 | Allocation                | <a href="#">#16b</a> | Mechanism of implementing the allocation<br>sequence (eg, central telephone; sequentially<br>numbered, opaque, sealed envelopes),<br>describing any steps to conceal the sequence<br>until interventions are assigned                                                                                                                                                         | 6                       |
| 42 | concealment               |                      |                                                                                                                                                                                                                                                                                                                                                                               |                         |
| 43 | mechanism                 |                      |                                                                                                                                                                                                                                                                                                                                                                               |                         |
| 44 |                           |                      |                                                                                                                                                                                                                                                                                                                                                                               |                         |
| 45 |                           |                      |                                                                                                                                                                                                                                                                                                                                                                               |                         |
| 46 |                           |                      |                                                                                                                                                                                                                                                                                                                                                                               |                         |
| 47 |                           |                      |                                                                                                                                                                                                                                                                                                                                                                               |                         |
| 48 |                           |                      |                                                                                                                                                                                                                                                                                                                                                                               |                         |
| 49 | Allocation:               | <a href="#">#16c</a> | Who will generate the allocation sequence, who<br>will enrol participants, and who will assign<br>participants to interventions                                                                                                                                                                                                                                               | N/A not been<br>decided |
| 50 | implementation            |                      |                                                                                                                                                                                                                                                                                                                                                                               |                         |
| 51 |                           |                      |                                                                                                                                                                                                                                                                                                                                                                               |                         |
| 52 |                           |                      |                                                                                                                                                                                                                                                                                                                                                                               |                         |
| 53 |                           |                      |                                                                                                                                                                                                                                                                                                                                                                               |                         |
| 54 | Blinding (masking)        | <a href="#">#17a</a> | Who will be blinded after assignment to<br>interventions (eg, trial participants, care                                                                                                                                                                                                                                                                                        | 6                       |
| 55 |                           |                      |                                                                                                                                                                                                                                                                                                                                                                               |                         |
| 56 |                           |                      |                                                                                                                                                                                                                                                                                                                                                                               |                         |
| 57 |                           |                      |                                                                                                                                                                                                                                                                                                                                                                               |                         |
| 58 |                           |                      |                                                                                                                                                                                                                                                                                                                                                                               |                         |
| 59 |                           |                      |                                                                                                                                                                                                                                                                                                                                                                               |                         |
| 60 |                           |                      |                                                                                                                                                                                                                                                                                                                                                                               |                         |

providers, outcome assessors, data analysts),  
and how

Blinding (masking): [#17b](#) If blinded, circumstances under which unblinding is permissible, and procedure for revealing a participant's allocated intervention during the trial

**Methods: Data collection, management, and analysis**

Data collection plan [#18a](#) Plans for assessment and collection of outcome, baseline, and other trial data, including any related processes to promote data quality (eg, duplicate 6measurements, training of assessors) and a description of study instruments (eg, questionnaires, laboratory tests) along with their reliability and validity, if known. Reference to where data collection forms can be found, if not in the protocol

Data collection plan: retention [#18b](#) Plans to promote participant retention and complete follow-up, including list of any outcome data to be collected for participants who discontinue or deviate from intervention protocols

Data management [#19](#) Plans for data entry, coding, security, and storage, including any related processes to promote data quality (eg, double data entry; range checks for data values). Reference to where details of data management procedures can be found, if not in the protocol

Statistics: outcomes [#20a](#) Statistical methods for analysing primary and secondary outcomes. Reference to where other details of the statistical analysis plan can be found, if not in the protocol

Statistics: additional analyses [#20b](#) Methods for any additional analyses (eg, subgroup and adjusted analyses)

|    |                      |                      |                                                      |       |
|----|----------------------|----------------------|------------------------------------------------------|-------|
| 1  | Statistics: analysis | <a href="#">#20c</a> | Definition of analysis population relating to        | 11    |
| 2  | population and       |                      | protocol non-adherence (eg, as randomised            |       |
| 3  | missing data         |                      | analysis), and any statistical methods to handle     |       |
| 4  |                      |                      | missing data (eg, multiple imputation)               |       |
| 5  |                      |                      |                                                      |       |
| 6  |                      |                      |                                                      |       |
| 7  |                      |                      |                                                      |       |
| 8  | <b>Methods:</b>      |                      |                                                      |       |
| 9  | <b>Monitoring</b>    |                      |                                                      |       |
| 10 |                      |                      |                                                      |       |
| 11 | Data monitoring:     | <a href="#">#21a</a> | Composition of data monitoring committee             | N/A   |
| 12 | formal committee     |                      | (DMC); summary of its role and reporting             |       |
| 13 |                      |                      | structure; statement of whether it is independent    |       |
| 14 |                      |                      | from the sponsor and competing interests; and        |       |
| 15 |                      |                      | reference to where further details about its         |       |
| 16 |                      |                      | charter can be found, if not in the protocol.        |       |
| 17 |                      |                      | Alternatively, an explanation of why a DMC is        |       |
| 18 |                      |                      | not needed                                           |       |
| 19 |                      |                      |                                                      |       |
| 20 | Data monitoring:     | <a href="#">#21b</a> | Description of any interim analyses and stopping     |       |
| 21 | interim analysis     |                      | guidelines, including who will have access to        |       |
| 22 |                      |                      | these interim results and make the final decision    |       |
| 23 |                      |                      | to terminate the trial                               |       |
| 24 |                      |                      |                                                      |       |
| 25 |                      |                      |                                                      |       |
| 26 |                      |                      |                                                      |       |
| 27 |                      |                      |                                                      |       |
| 28 |                      |                      |                                                      |       |
| 29 |                      |                      |                                                      |       |
| 30 |                      |                      |                                                      |       |
| 31 | Harms                | <a href="#">#22</a>  | Plans for collecting, assessing, reporting, and      |       |
| 32 |                      |                      | managing solicited and spontaneously reported        |       |
| 33 |                      |                      | adverse events and other unintended effects of       |       |
| 34 |                      |                      | trial interventions or trial conduct                 |       |
| 35 |                      |                      |                                                      |       |
| 36 |                      |                      |                                                      |       |
| 37 |                      |                      |                                                      |       |
| 38 | Auditing             | <a href="#">#23</a>  | Frequency and procedures for auditing trial          |       |
| 39 |                      |                      | conduct, if any, and whether the process will be     |       |
| 40 |                      |                      | independent from investigators and the sponsor       |       |
| 41 |                      |                      |                                                      |       |
| 42 |                      |                      |                                                      |       |
| 43 | <b>Ethics and</b>    |                      |                                                      |       |
| 44 | <b>dissemination</b> |                      |                                                      |       |
| 45 |                      |                      |                                                      |       |
| 46 |                      |                      |                                                      |       |
| 47 | Research ethics      | <a href="#">#24</a>  | Plans for seeking research ethics committee /        | 12-13 |
| 48 | approval             |                      | institutional review board (REC / IRB) approval      |       |
| 49 |                      |                      |                                                      |       |
| 50 |                      |                      |                                                      |       |
| 51 | Protocol             | <a href="#">#25</a>  | Plans for communicating important protocol           | N/A   |
| 52 | amendments           |                      | modifications (eg, changes to eligibility criteria,  |       |
| 53 |                      |                      | outcomes, analyses) to relevant parties (eg,         |       |
| 54 |                      |                      | investigators, REC / IRBs, trial participants, trial |       |
| 55 |                      |                      | registries, journals, regulators)                    |       |
| 56 |                      |                      |                                                      |       |
| 57 |                      |                      |                                                      |       |
| 58 |                      |                      |                                                      |       |
| 59 |                      |                      |                                                      |       |
| 60 |                      |                      |                                                      |       |



|    |                       |                      |                                                    |       |
|----|-----------------------|----------------------|----------------------------------------------------|-------|
| 1  | Consent or assent     | <a href="#">#26a</a> | Who will obtain informed consent or assent from    | 12    |
| 2  |                       |                      | potential trial participants or authorised         |       |
| 3  |                       |                      | surrogates, and how (see Item 32)                  |       |
| 4  |                       |                      |                                                    |       |
| 5  |                       |                      |                                                    |       |
| 6  | Consent or assent:    | <a href="#">#26b</a> | Additional consent provisions for collection and   | N/A   |
| 7  | ancillary studies     |                      | use of participant data and biological specimens   |       |
| 8  |                       |                      | in ancillary studies, if applicable                |       |
| 9  |                       |                      |                                                    |       |
| 10 |                       |                      |                                                    |       |
| 11 | Confidentiality       | <a href="#">#27</a>  | How personal information about potential and       | 12-13 |
| 12 |                       |                      | enrolled participants will be collected, shared,   |       |
| 13 |                       |                      | and maintained in order to protect confidentiality |       |
| 14 |                       |                      | before, during, and after the trial                |       |
| 15 |                       |                      |                                                    |       |
| 16 |                       |                      |                                                    |       |
| 17 |                       |                      |                                                    |       |
| 18 | Declaration of        | <a href="#">#28</a>  | Financial and other competing interests for        | 13    |
| 19 | interests             |                      | principal investigators for the overall trial and  |       |
| 20 |                       |                      | each study site                                    |       |
| 21 |                       |                      |                                                    |       |
| 22 |                       |                      |                                                    |       |
| 23 |                       |                      |                                                    |       |
| 24 | Data access           | <a href="#">#29</a>  | Statement of who will have access to the final     | 13    |
| 25 |                       |                      | trial dataset, and disclosure of contractual       |       |
| 26 |                       |                      | agreements that limit such access for              |       |
| 27 |                       |                      | investigators                                      |       |
| 28 |                       |                      |                                                    |       |
| 29 |                       |                      |                                                    |       |
| 30 | Ancillary and post    | <a href="#">#30</a>  | Provisions, if any, for ancillary and post-trial   | None  |
| 31 | trial care            |                      | care, and for compensation to those who suffer     |       |
| 32 |                       |                      | harm from trial participation                      |       |
| 33 |                       |                      |                                                    |       |
| 34 |                       |                      |                                                    |       |
| 35 |                       |                      |                                                    |       |
| 36 | Dissemination         | <a href="#">#31a</a> | Plans for investigators and sponsor to             | 13    |
| 37 | policy: trial results |                      | communicate trial results to participants,         |       |
| 38 |                       |                      | healthcare professionals, the public, and other    |       |
| 39 |                       |                      | relevant groups (eg, via publication, reporting in |       |
| 40 |                       |                      | results databases, or other data sharing           |       |
| 41 |                       |                      | arrangements), including any publication           |       |
| 42 |                       |                      | restrictions                                       |       |
| 43 |                       |                      |                                                    |       |
| 44 |                       |                      |                                                    |       |
| 45 |                       |                      |                                                    |       |
| 46 |                       |                      |                                                    |       |
| 47 | Dissemination         | <a href="#">#31b</a> | Authorship eligibility guidelines and any intended | 13    |
| 48 | policy: authorship    |                      | use of professional writers                        |       |
| 49 |                       |                      |                                                    |       |
| 50 |                       |                      |                                                    |       |
| 51 | Dissemination         | <a href="#">#31c</a> | Plans, if any, for granting public access to the   | None  |
| 52 | policy: reproducible  |                      | full protocol, participant-level dataset, and      |       |
| 53 | research              |                      | statistical code                                   |       |
| 54 |                       |                      |                                                    |       |
| 55 |                       |                      |                                                    |       |

## Appendices

|    |                      |                     |                                                  |                   |
|----|----------------------|---------------------|--------------------------------------------------|-------------------|
| 1  | Informed consent     | <a href="#">#32</a> | Model consent form and other related             | N/A the study was |
| 2  | materials            |                     | documentation given to participants and          | granted including |
| 3  |                      |                     | authorised surrogates                            | consent forms, by |
| 4  |                      |                     |                                                  | national review   |
| 5  |                      |                     |                                                  | board             |
| 6  |                      |                     |                                                  |                   |
| 7  |                      |                     |                                                  |                   |
| 8  |                      |                     |                                                  |                   |
| 9  | Biological specimens | <a href="#">#33</a> | Plans for collection, laboratory evaluation, and | N/A               |
| 10 |                      |                     | storage of biological specimens for genetic or   |                   |
| 11 |                      |                     | molecular analysis in the current trial and for  |                   |
| 12 |                      |                     | future use in ancillary studies, if applicable   |                   |
| 13 |                      |                     |                                                  |                   |
| 14 |                      |                     |                                                  |                   |
| 15 |                      |                     |                                                  |                   |

16 None The SPIRIT checklist is distributed under the terms of the Creative Commons Attribution  
17 License CC-BY-ND 3.0. This checklist can be completed online using <https://www.goodreports.org/>, a  
18 tool made by the [EQUATOR Network](#) in collaboration with [Penelope.ai](#)  
19  
20  
21  
22  
23  
24  
25  
26  
27  
28  
29  
30  
31  
32  
33  
34  
35  
36  
37  
38  
39  
40  
41  
42  
43  
44  
45  
46  
47  
48  
49  
50  
51  
52  
53  
54  
55  
56  
57  
58  
59  
60
